# Supplementary material
Source: Research Square preprint supplement (doi:10.21203/rs.3.rs-8904859/v1)
Supplement: Supplementary file 1 [file 1c80f8649f6d1f4e110ad7b3.docx]

**Extended data**

**Title:**

Assessment of characteristic orthologs in Ascomycota and Basidiomycota and their　implications for fungal taxonomy

**Authors:**

Masako Takashima1,2,8, Ri-ichiroh Manabe3,8, Keita Aoki1,8, Masahiro Yuki2, Gen Okada2, Yuuki Kobayashi1, Takashi Sugita4, Junta Sugiyama5,6,9, Moriya Ohkuma2, Naoto Tanaka7

**Corresponding Authors:**

Masako Takashima (mt207623@nodai.ac.jp) and Naoto Tanaka (n3tanaka@nodai.ac.jp)

**This word file includes:**

Extended Data Figures 1 to 6

Extended Data Table 1


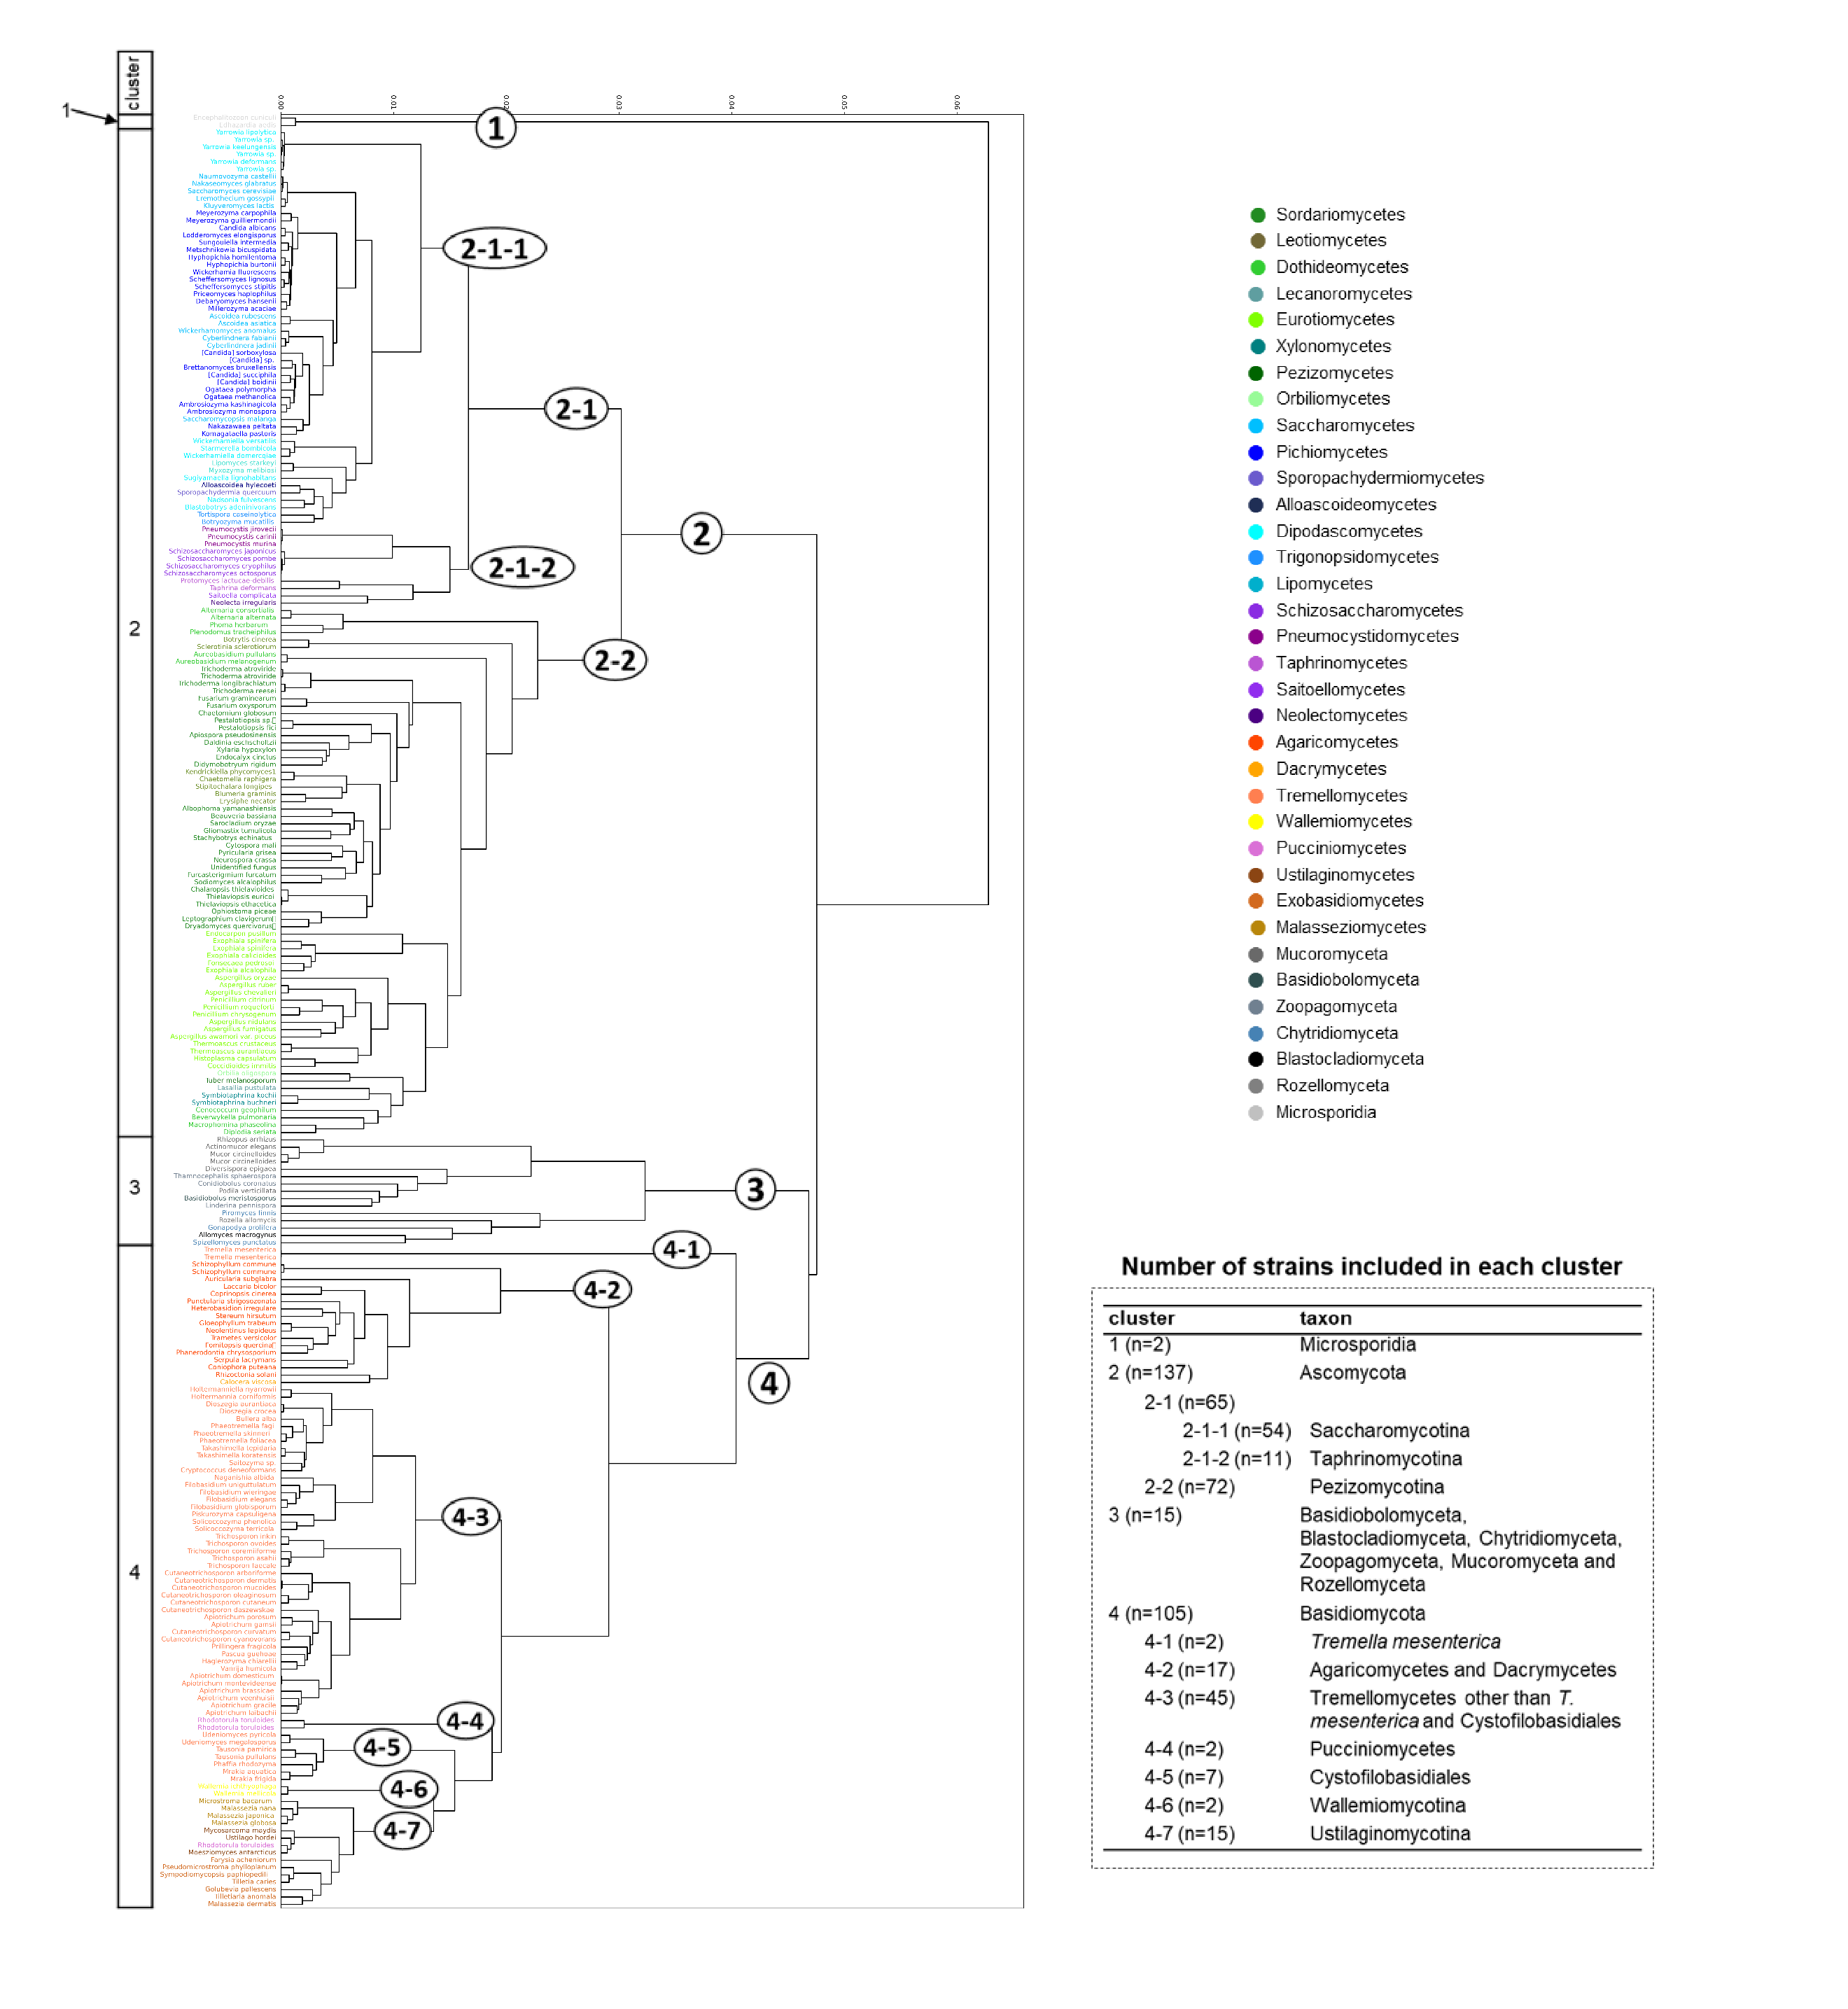


**Extended Data Fig. 1.** Cluster analysis of a presence/absence matrix of orthologue groups (OGs), excluding genomes belonging to subcluster 4-8 in Figure 2. Colours of scientific names represent classes within Dikarya or subkingdoms among early-diverging lineages, as shown in Figure 1.

**
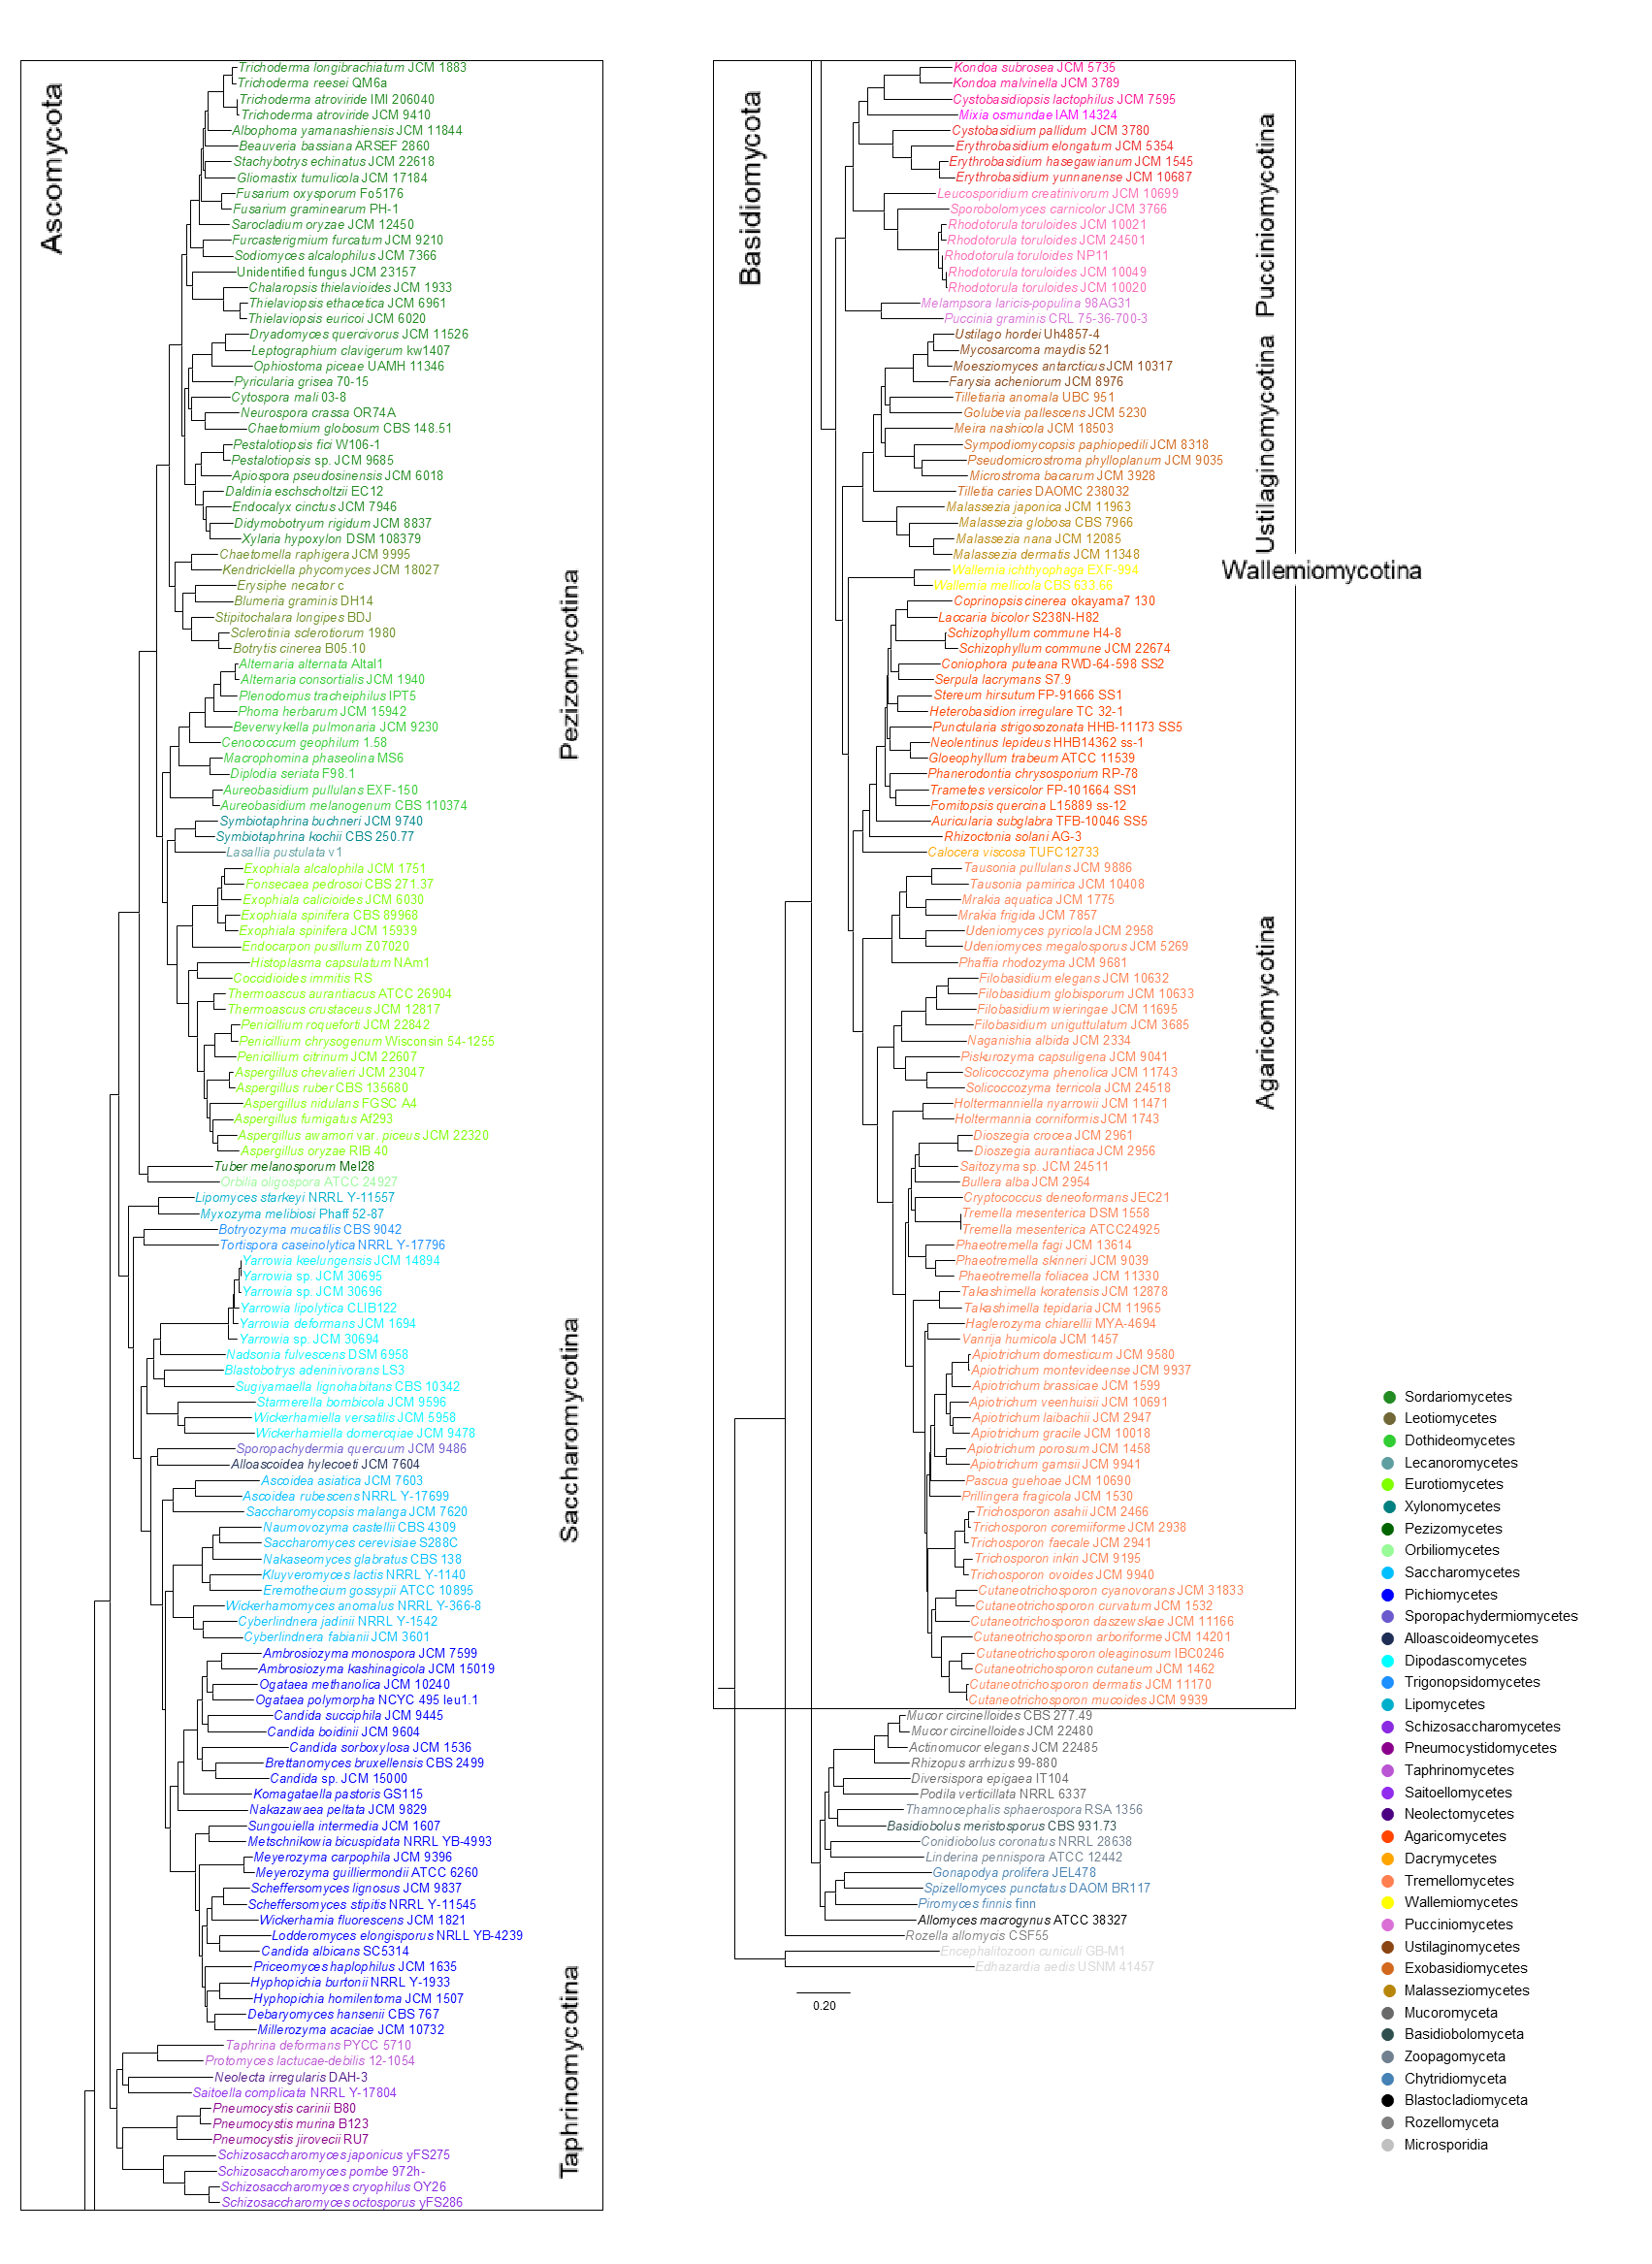
Extended Data Fig. 2.** Phylogenetic tree of 259 fungal genomes used for FastOMA analysis. The tree topology was constructed with OrthoFinder 2.5.531, 67–69 using default parameter values. Colours of scientific names represent classes within Dikarya or subkingdoms among early-diverging lineages, as shown in Figure 1.


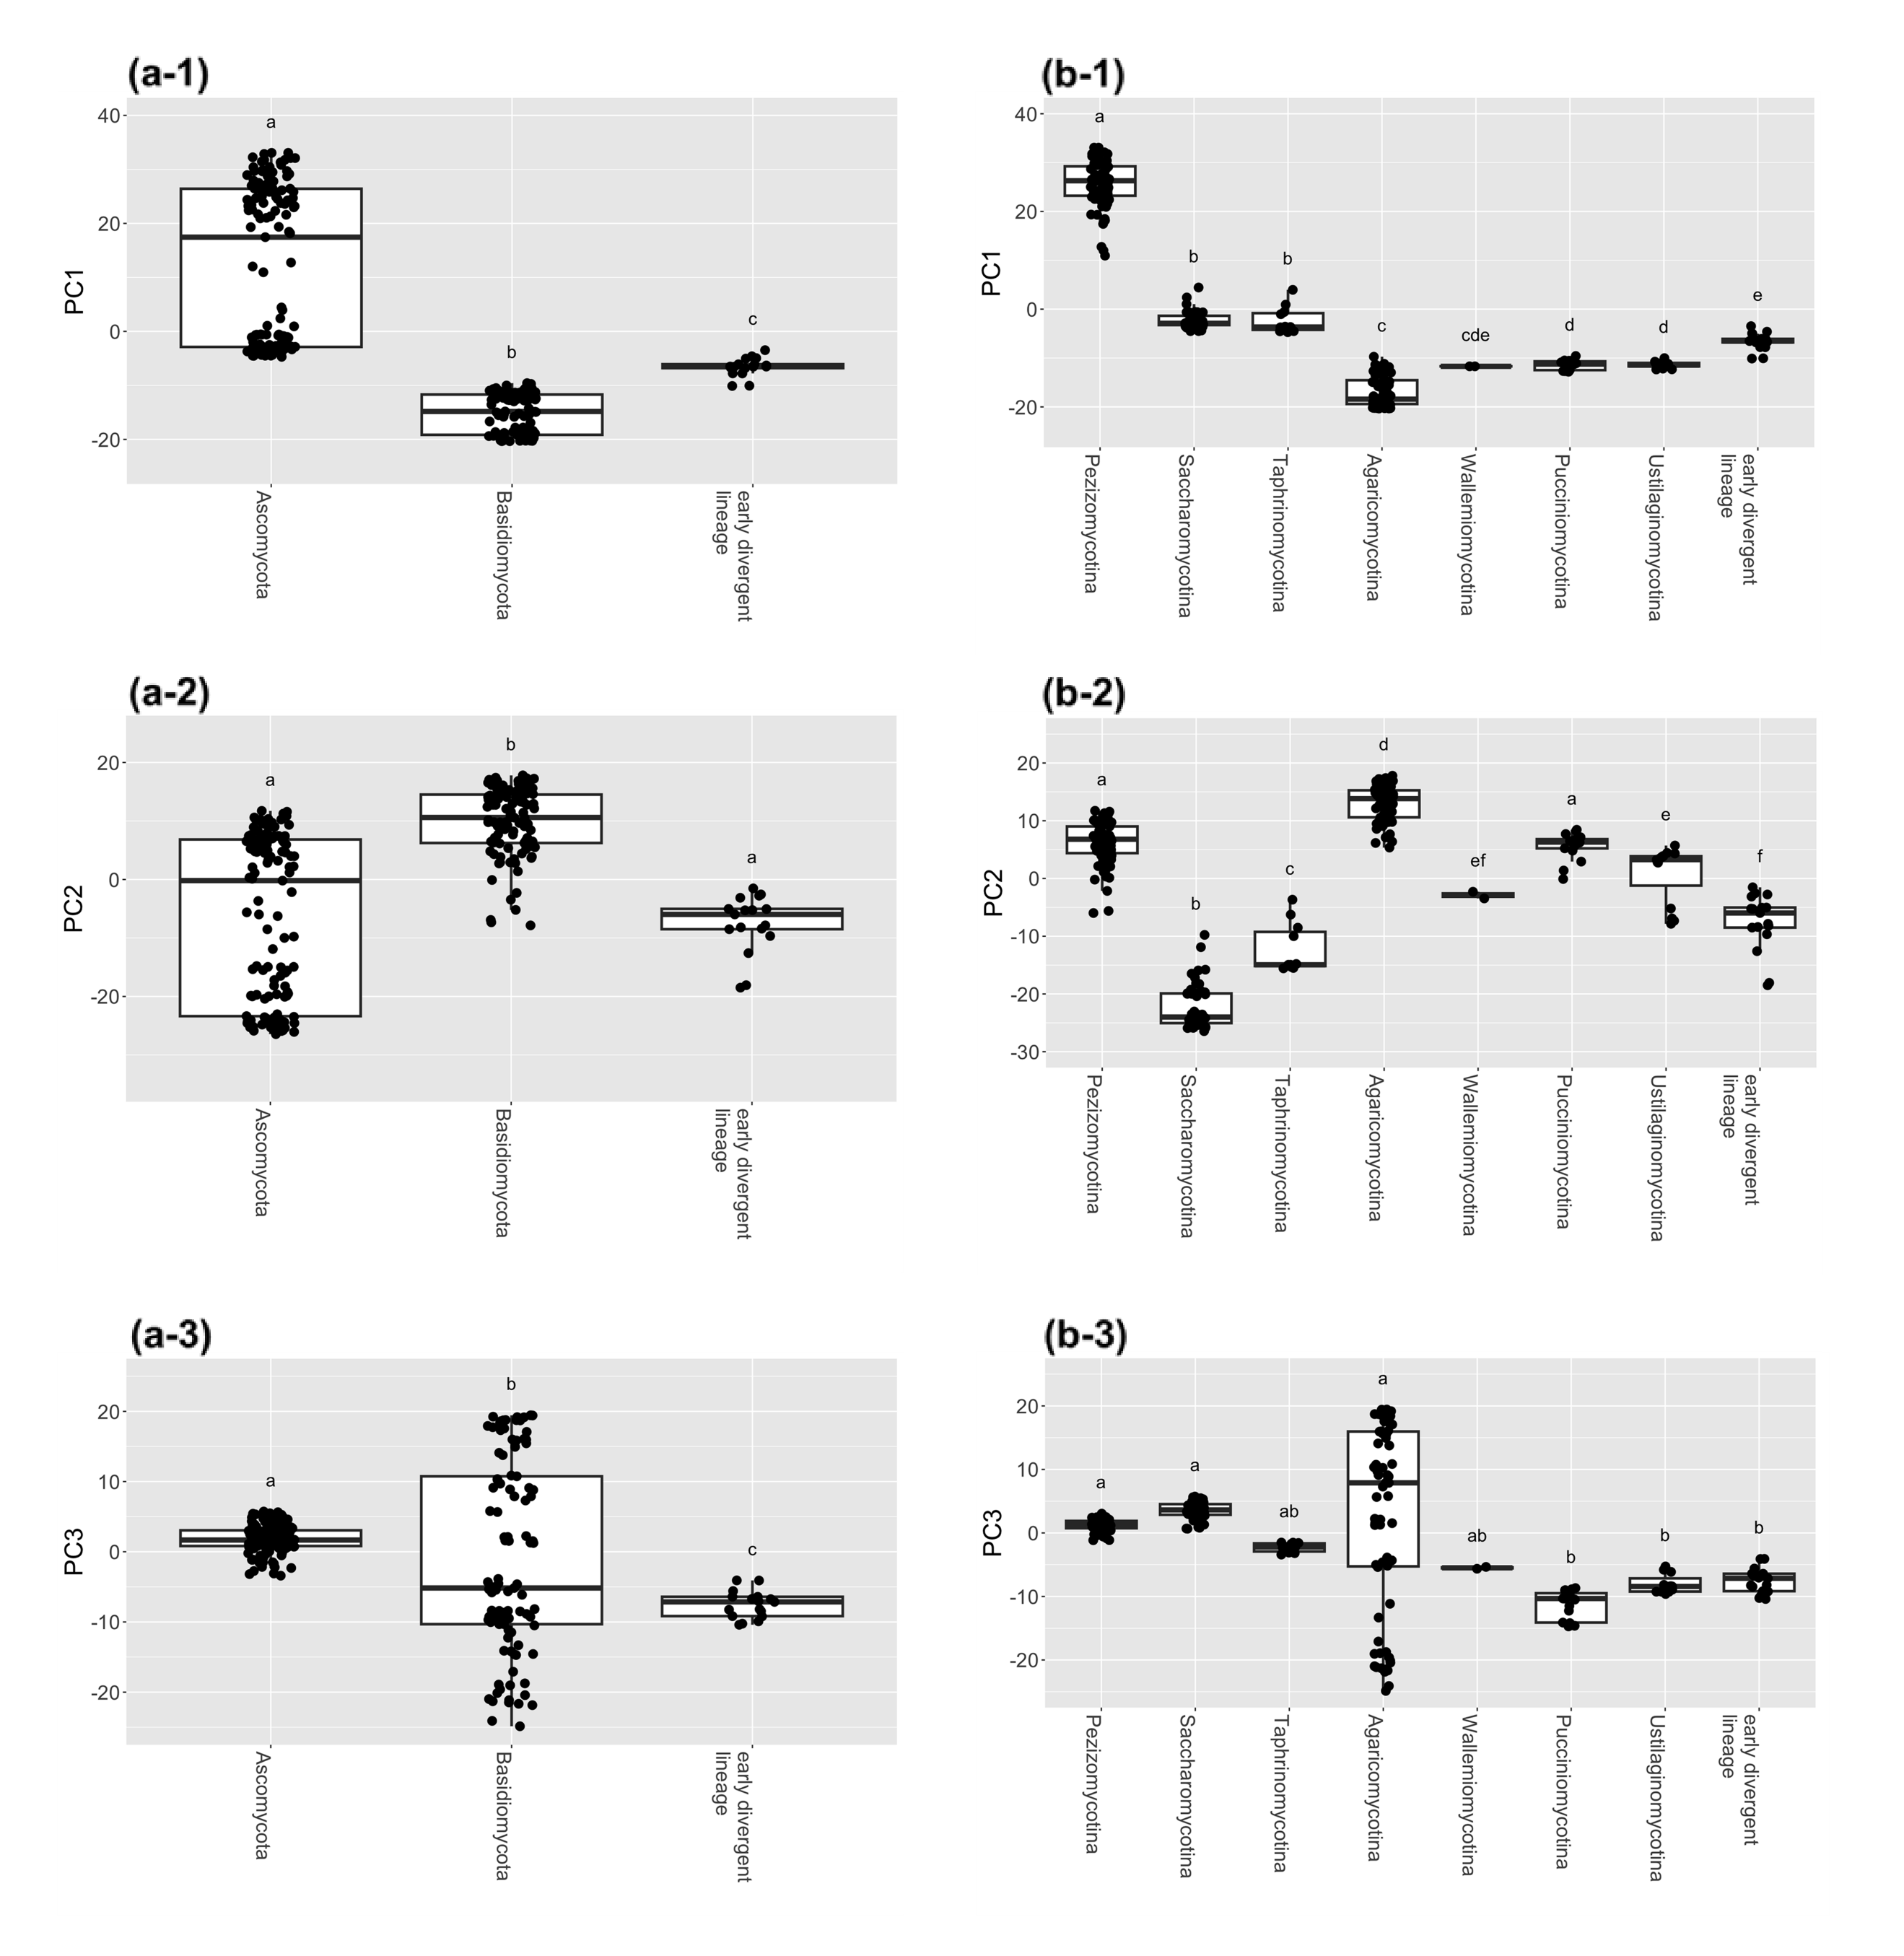
 **Extended Data Fig. 3.** Tukey–Kramer test results at the (a) phylum and (b) subphylum levels were performed for principal components (PCs) 1, 2, and 3, respectively. In each panel, different letters indicate significant differences between groups.


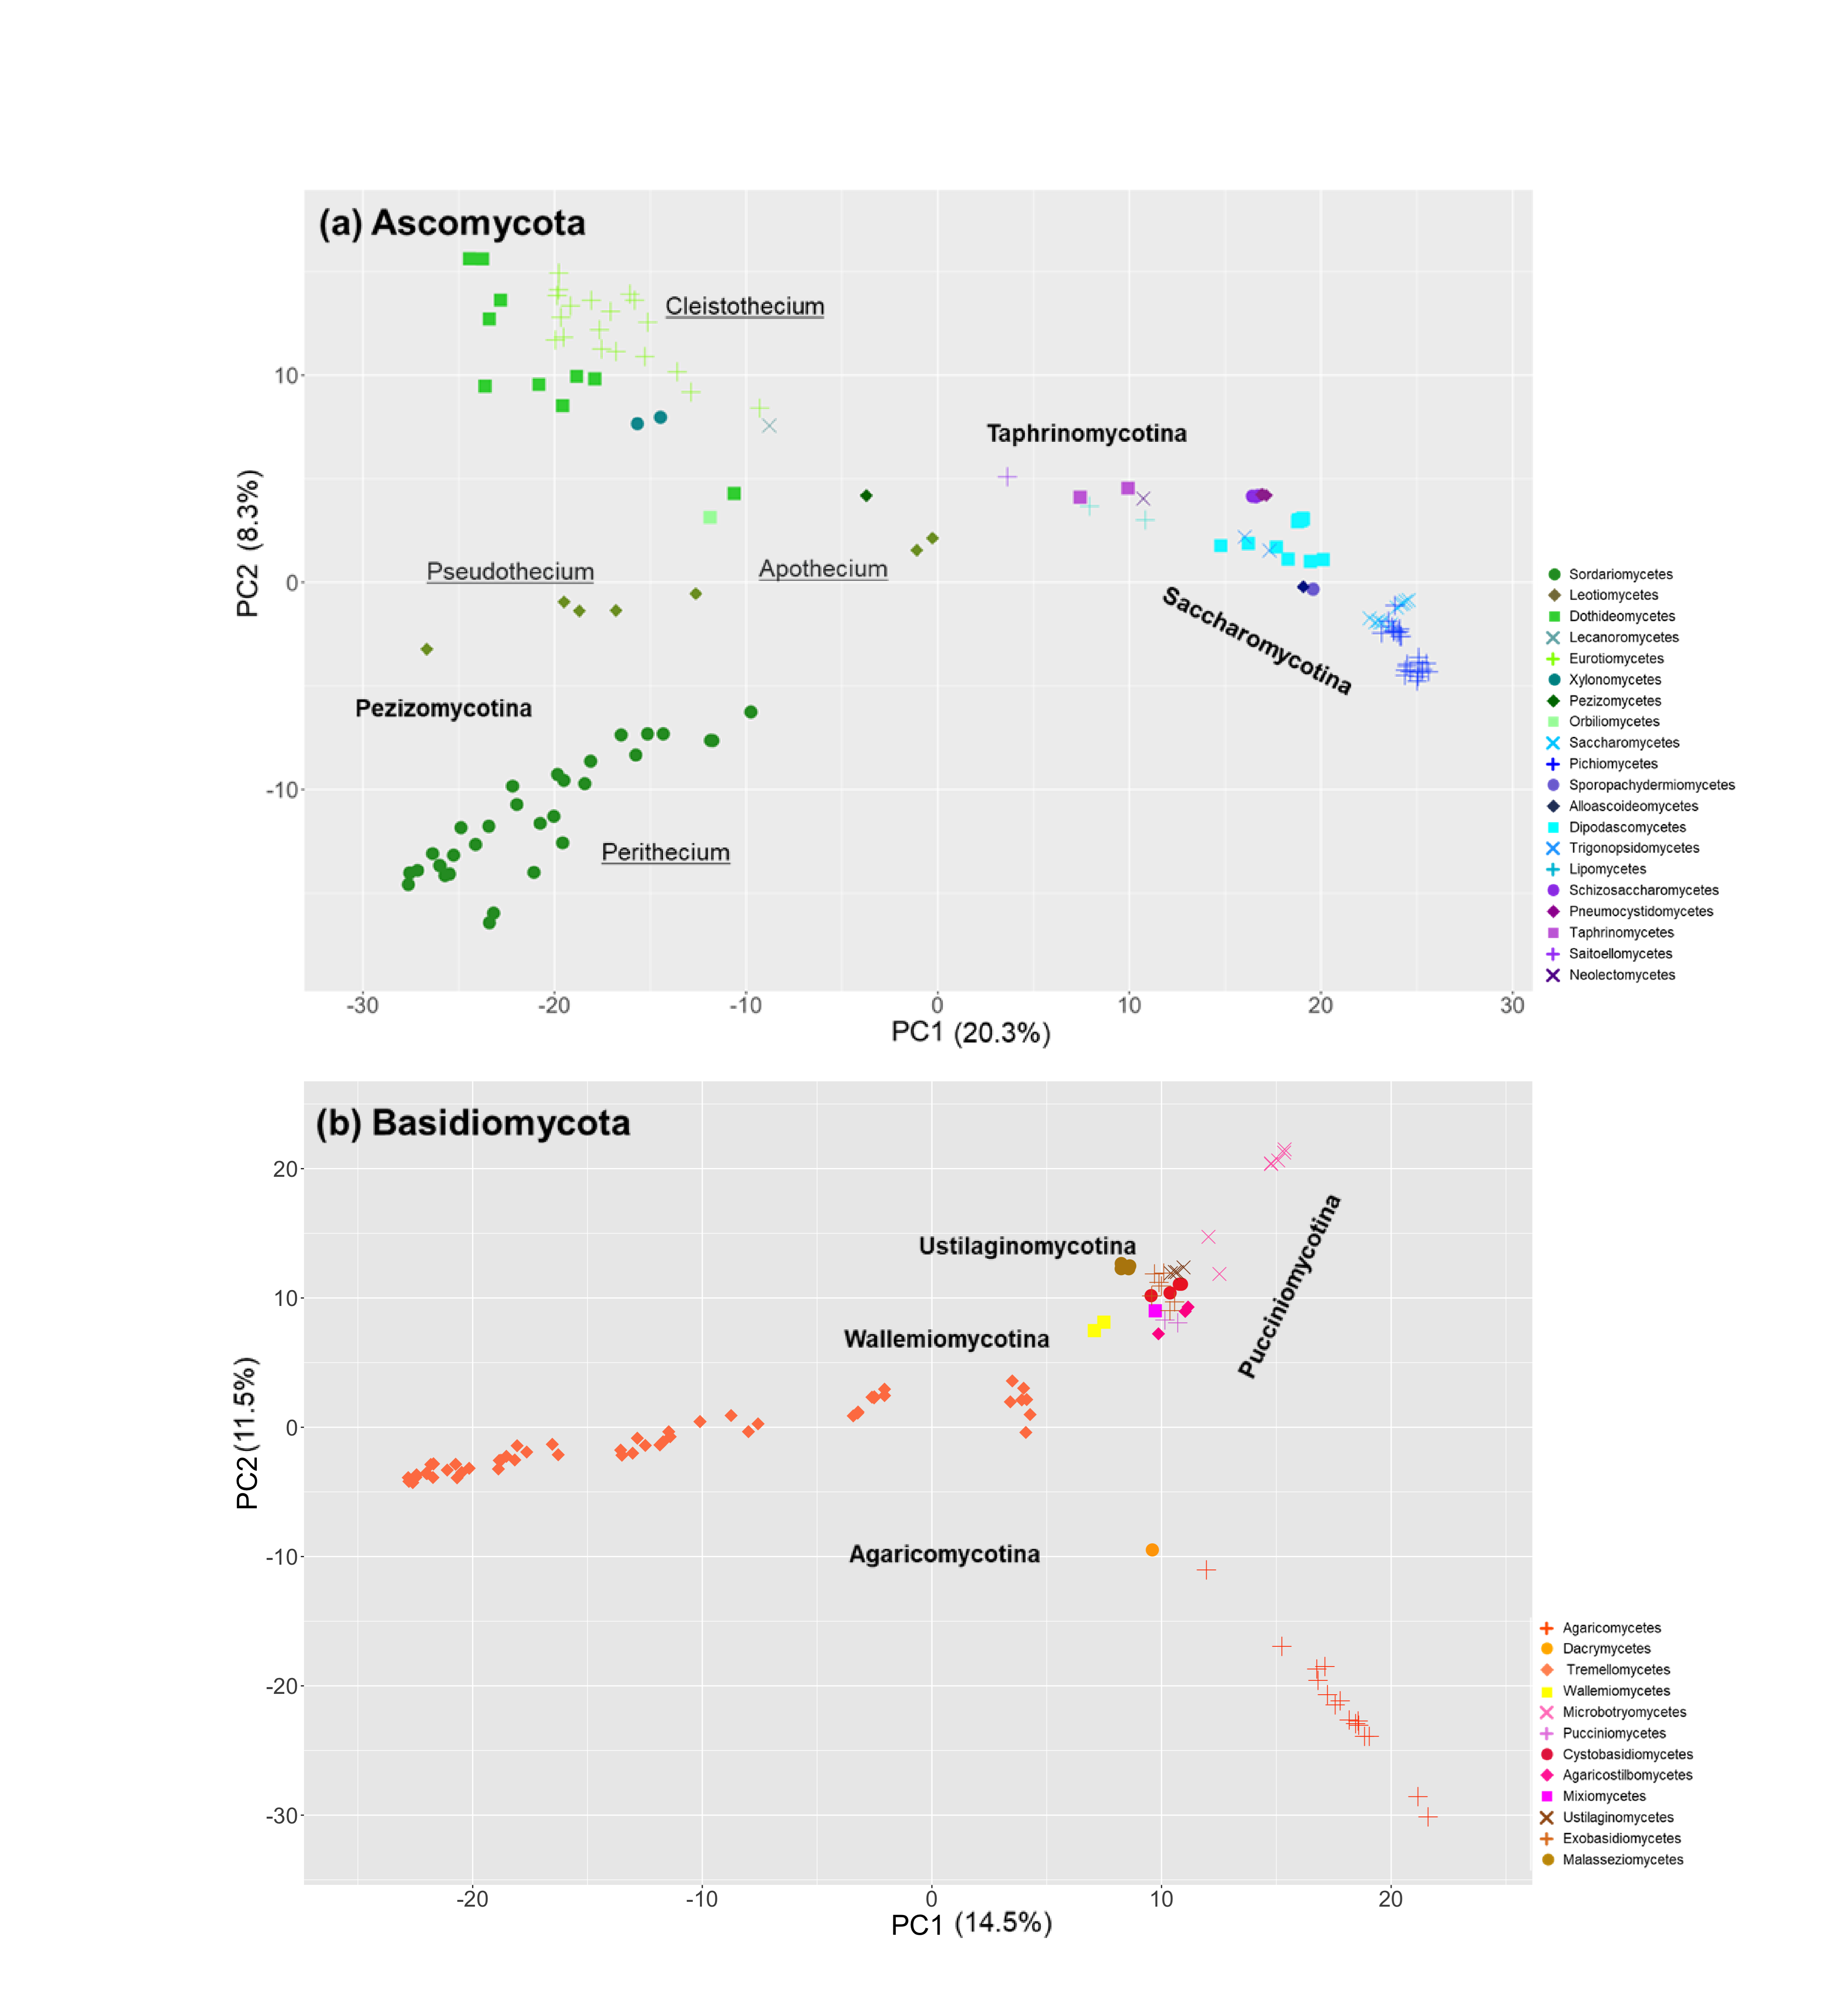
 **Extended Data Fig. 4.** Phylum-level principal component analysis results for (a) Ascomycota and (b) Basidiomycota. Two-dimensional plots of PC1 and PC2 are shown. Symbols and colours indicate Dikarya classes, as in Figure 1.


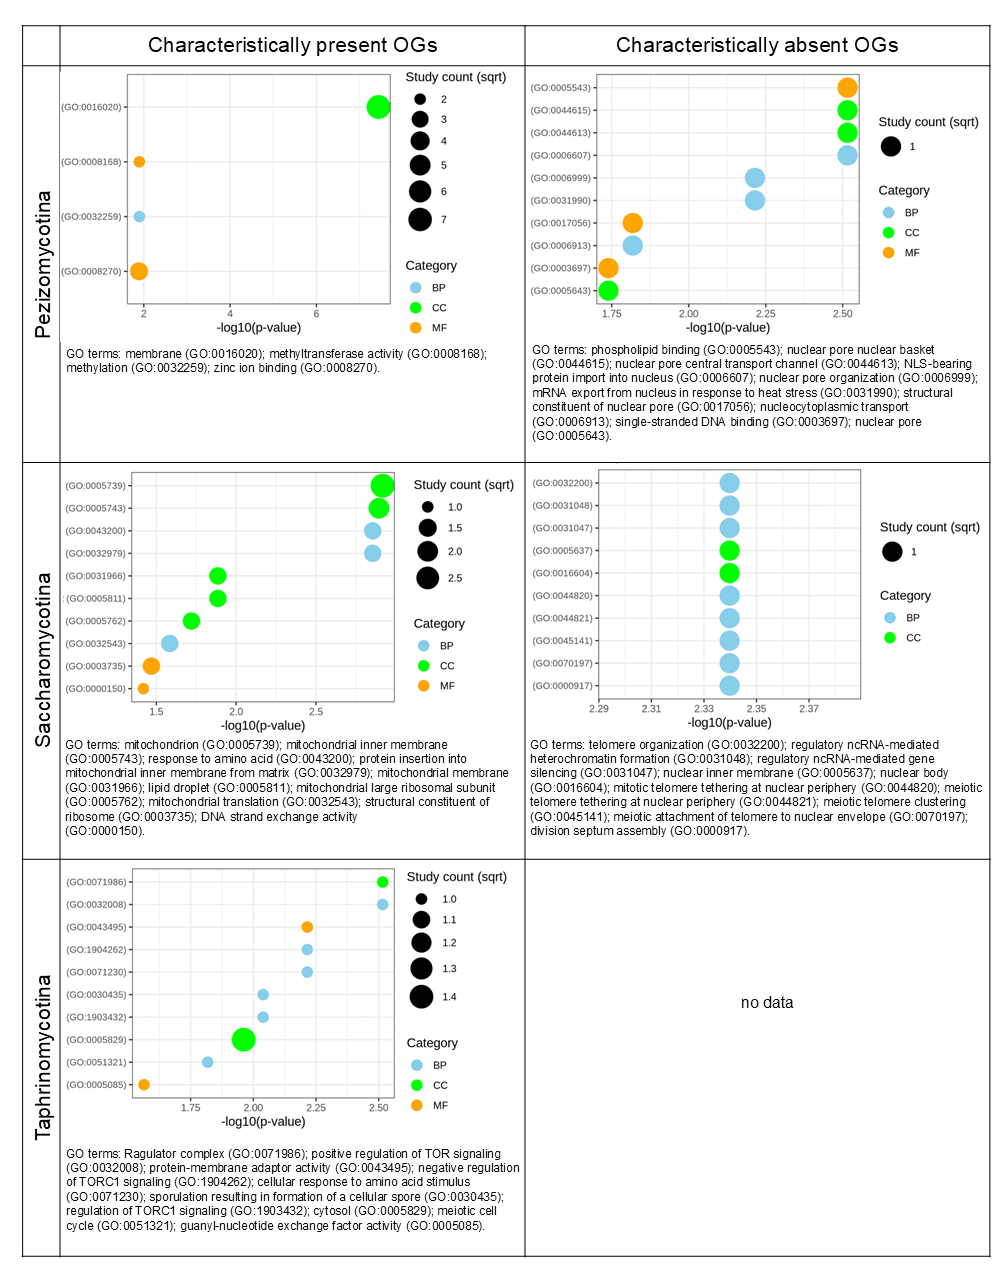
 **Extended Data Fig. 5.** The 10 most highly enriched Gene Ontology (GO) terms (*P* < 0.05) of characteristically present and characteristically absent OGs in subphyla of Ascomycota. Detailed data are provided in Supplementary Table 5a–c.


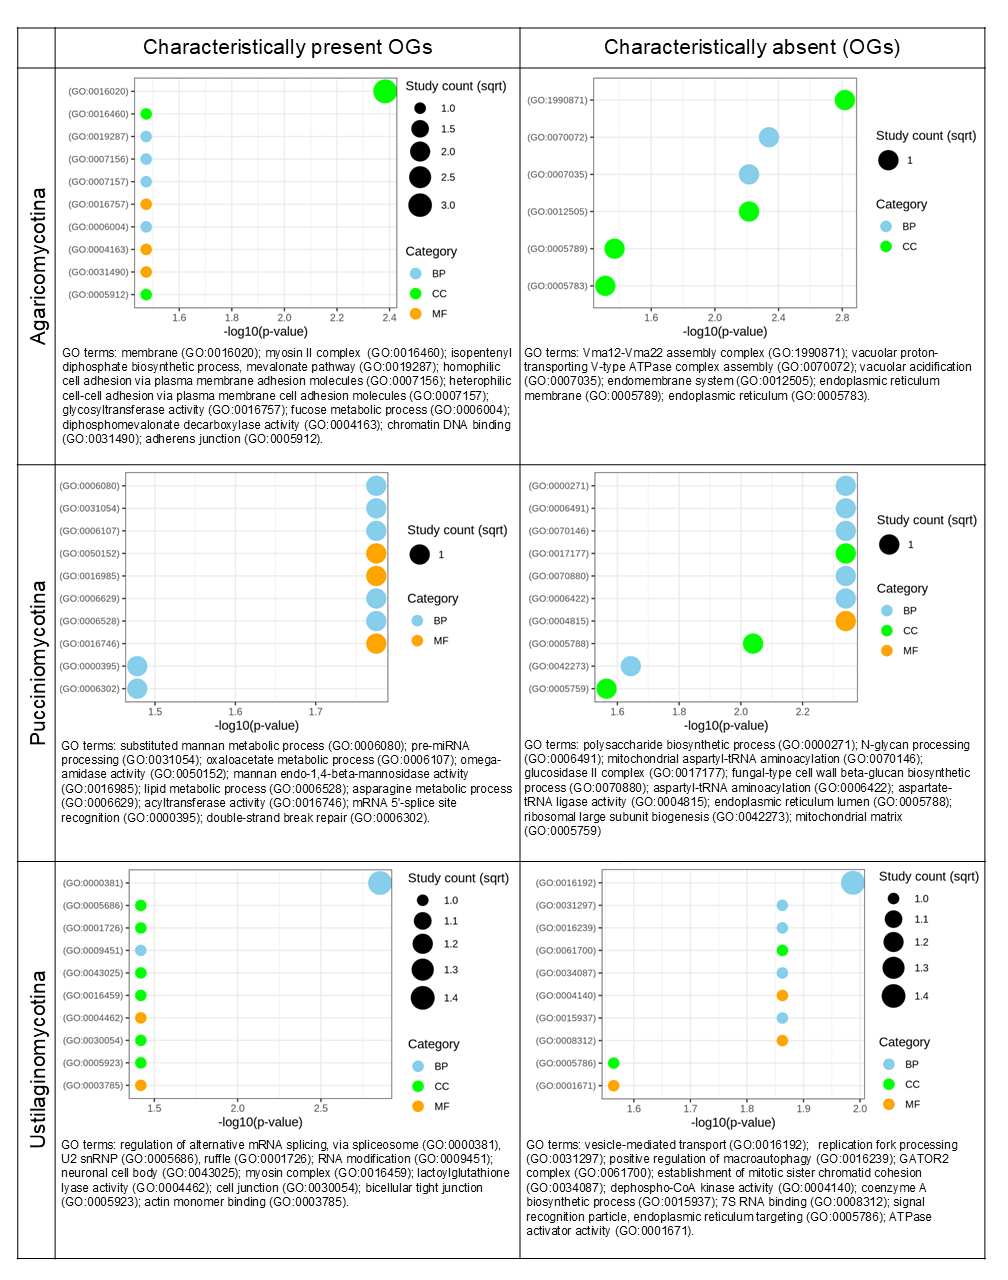
 **Extended Data Fig. 6.** The 10 most highly enriched GO terms (*P* < 0.05) of characteristically present and characteristically absent OGs in subphyla of Basidiomycota. Detailed data are provided in Supplementary Table 5d–f.

Extended Data Table 1. Gene gain, duplication, retention, and loss extrapolated at nodes of Ascomycota and Basidiomycota using the FastOMA v1.4.1-1.el9 package39.
