# Supplementary material
Source: Research Square preprint supplement (doi:10.21203/rs.3.rs-8904859/v1)
Supplement: Supplementary file 2 [file 237571563096eb4ab5f5824b.docx]

**SI Guide**

**Title:**

Assessment of characteristic orthologs in Ascomycota and Basidiomycota and their　implications for fungal taxonomy

**Authors:**

Masako Takashima1,2,8, Ri-ichiroh Manabe3,8, Keita Aoki1,8, Masahiro Yuki2, Gen Okada2, Yuuki Kobayashi1, Takashi Sugita4, Junta Sugiyama5,6,9, Moriya Ohkuma2, Naoto Tanaka7

**Corresponding Authors:**

Masako Takashima (mt207623@nodai.ac.jp) and Naoto Tanaka (n3tanaka@nodai.ac.jp)

**This guide file includes:**

Supplementary Tables 1 to 5

Supplementary File (HTML document)

References for Supplementary Table 1

**Supplementary Table 1.** List of genomes used in this study.Classification data were obtained from Mycobank (https://www.mycobank.org/) and Index Fungorum (https://indexfungorum.org/). *Candida* species in square brackets were classified using the NCBI taxonomy database. 1, see Materials and Methods.

**Supplementary Table 2.** Distribution of OGs involved in chitin synthesis and degradation.

1*, N., Neolecta; Pneu., Pneumocystis; Pro., Protomyces; Sai., Saitoella; Schi., Schizosaccharomyces; T., Taphrina.*

2*, A., Aspergillus; B., Beauveria; C., Coprinopsis; D., Diplodia; E., Encephalitozoon; Mac., Macrophomina; Muc., Mucor; S., Saccharomyces; Schi., Schizosaccharomyces; T., Trichoderma.*

**Supplementary Table 3.** OGs shared among clusters based on cluster analysis using Yule coefficients.

**Supplementary Table 4.** Tukey–Kramer test results for PC1, PC2, and PC3.

**Supplementary Table 5.** OGs that characterise (a) Pezizomycotina (characteristically present and characteristically absent OGs); (b) Saccharomycotina (characteristically present and characteristically absent OGs); (c) Taphnimomycotina (characteristically present OGs); (d) Agaricomycotina (characteristically present and characteristically absent OGs); (e) Pucciniomycotina (characteristically present and characteristically absent OGs); (f) Ustilaginomycotina (characteristically present and characteristically absent OGs); (g) Ascomycota (characteristically present OGs); (h) Basidiomycota (characteristically present OGs); (i) OGs present in all species.

**Supplementary File**

Three-dimensional plot of principal component analysis results, presented as an HTML file. Scientific names and principal component values can be accessed by hovering a cursor over the genome symbols.

**SI References**

**References for Supplementary Information 1**:

1. Yin, Z. et al. Genome sequence of *Valsa* canker pathogens uncovers a potential adaptation of colonization of woody bark. *New Phytol*. **208**, 1202-1216 (2015).
2. Xiao, G. et al. Genomic perspectives on the evolution of fungal entomopathogenicity in *Beauveria bassiana*. *Sci. Rep*. **2**, 483 (2012).
3. Kubicek, C. P. et al*.* Comparative genome sequence analysis underscores mycoparasitism as the ancestral life style of *Trichoderma*. *Genome Biol*. **12**, R40 (2011).
4. Martinez, D.et al*.* Genome sequencing and analysis of the biomass-degrading fungus *Trichoderma reesei* (syn. *Hypocrea jecorina*). *Nat. Biotechnol*. **26**, 553-560 (2008). Erratum in: *Nat. Biotechnol*. **26**, 1193 (2008).
5. Cuomo, C. A. et al*.* The *Fusarium graminearum* genome reveals a link between localized polymorphism and pathogen specialization. *Science* **317**, 1400-1402 (2007).
6. Thatcher, L. F., Gardiner, D. M., Kazan, K. & Manners, J. M. A highly conserved effector in *Fusarium oxysporum* is required for full virulence on *Arabidopsis*. *Mol. Plant. Microbe Interact*. **25**, 180-190 (2012).
7. Dean, R. A. et al*.* The genome sequence of the rice blast fungus *Magnaporthe grisea*. *Nature* **434**, 980-986 (2005).
8. DiGuistini, S. et al*.* Genome and transcriptome analyses of the mountain pine beetle-fungal symbiont *Grosmannia clavigera*, a lodgepole pine pathogen. *Proc. Natl. Acad. Sci. U.S.A*. **108**, 2504-2509 (2011).
9. Haridas, S. et al*.* The genome and transcriptome of the pine saprophyte *Ophiostoma picea*e, and a comparison with the bark beetle-associated pine pathogen *Grosmannia clavigera*. *BMC Genomics* **14**, 373 (2013).
10. Cuomo, C. A. et al*.* Draft Genome Sequence of the Cellulolytic Fungus Chaetomium globosum. *Genome Announc.* **3**, e00021-15 (2015).
11. Galagan, J. E. et al*.* The genome sequence of the filamentous fungus *Neurospora crassa*. *Nature* **422**, 859-868 (2003).
12. Wu, W. et al*.* Characterization of four endophytic fungi as potential consolidated bioprocessing hosts for conversion of lignocellulose into advanced biofuels. *Appl. Microbiol. Biotechnol*. **101**, 2603-2618 (2017).
13. Wang, X. et al*.* Genomic and transcriptomic analysis of the endophytic fungus *Pestalotiopsis fici* reveals its lifestyle and high potential for synthesis of natural products. *BMC Genomics*. **16**, 28 (2015).
14. Büttner, E. et al*.* Draft genome sequence of *Xylaria hypoxylon* DSM 108379, a ubiquitous fungus on hardwood. *Microbiol. Resour. Announc*. **8**, e00845-19 (2019).
15. Spanu,P. D. et al*.* Genome expansion and gene loss in powdery mildew fungi reveal tradeoffs in extreme parasitism. *Science* **330**, 1543-1546 (2010).
16. Jones, L. et al*.* Adaptive genomic structural variation in the grape powdery mildew pathogen, *Erysiphe necator*. *BMC Genomics* **15**, 1081 (2014).
17. Barbi, F. et al*.* Fungal ecological strategies reflected in gene transcription - a case study of two litter decomposers. *Environ. Microbiol*. **22**, 1089-1103 (2020).
18. Van Kan,J. A. L. et al*.,* A gapless genome sequence of the fungus *Botrytis cinerea*. *Mol. Plant. Pathol*. **18**, 75-89 (2017).
19. Amselem, J. et al. Genomic analysis of the necrotrophic fungal pathogens *Sclerotinia sclerotiorum* and *Botrytis cinerea*. *PLoS Genet* **7**, e1002230 (2011).
20. Robert-Siegwald, G. et al. Draft genome sequence of *Diplodia seriata* F98.1, a fungal species involved in grapevine trunk diseases. *Genome Announc*. **5**, e00061-17 (2017).
21. Islam, M. S.et al. Tools to kill: genome of one of the most destructive plant pathogenic fungi *Macrophomina phaseolina*. *BMC Genomics* **13**, 493 (2012).
22. Gostinčar, C. et al. Genome sequencing of four *Aureobasidium pullulans* varieties: biotechnological potential, stress tolerance, and description of new species. *BMC Genomics* **15**, 549 (2014).
23. Haridas, S.et al. 101 *Dothideomycetes* genomes: A test case for predicting lifestyles and emergence of pathogens. *Stud. Mycol*. **96**, 141-153 (2020).
24. Zeiner, C. A.et al. Comparative analysis of secretome profiles of manganese(II)-oxidizing ascomycete fungi. *PLoS One* **11**, e0157844 (2016).
25. Peter, M. et al. Ectomycorrhizal ecology is imprinted in the genome of the dominant symbiotic fungus *Cenococcum geophilum*. *Nat. Commun*. **7**, 12662 (2016).
26. Dal Grande, F. et al. Adaptive differentiation coincides with local bioclimatic conditions along an elevational cline in populations of a lichen-forming fungus. *BMC Evol. Biol.* **17**, 93 (2017).
27. Nierman, W. C. et al. Genomic sequence of the pathogenic and allergenic filamentous fungus *Aspergillus fumigatus*. *Nature* **438**, 1151-1156 (2005). Erratum in: *Nature* **439**, 502 (2006).
28. Galagan, J. E. et al. Sequencing of *Aspergillus nidulans* and comparative analysis with *A. fumigatus* and *A. oryza*e. *Nature* **438**, 1105-1115 (2005).
29. Machida, M. et al. Genome sequencing and analysis of *Aspergillus oryzae*. *Nature* **438**, 1157-1161 (2005).
30. Kis-Papo, T. et al. Genomic adaptations of the halophilic Dead Sea filamentous fungus *Eurotium rubrum*. *Nat. Commun*. **5**, 3745 (2014).
31. van den Berg,M. A. et al. Genome sequencing and analysis of the filamentous fungus *Penicillium chrysogenum*. *Nat. Biotechnol.* **26**, 1161-1168 (2008).
32. Sharpton, T. J.et al. Comparative genomic analyses of the human fungal pathogens *Coccidioides* and their relatives. *Genome Res*. **19**, 1722-1731 (2009).
33. Wang, Y. Y.et al. Genome characteristics reveal the impact of lichenization on lichen-forming fungus *Endocarpon pusillum* Hedwig(Verrucariales, Ascomycota). *BMC Genomics* **15**, 34 (2014).
34. Martin, F. et al. Périgord black truffle genome uncovers evolutionary origins and mechanisms of symbiosis. *Nature* **464**, 1033-1038 (2010).
35. Yang, J. et al. Genomic and proteomic analyses of the fungus *Arthrobotrys oligospora* provide insights into nematode-trap formation. *PLoS Pathog*. **7**, e1002179 (2011).
36. Shen, X. X. et al. Tempo and mode of genome evolution in the budding yeast subphylum. *Cell* **175**, 1533-1545.e20 (2018).
37. Riley, R. et al., Comparative genomics of biotechnologically important yeasts. *Proc. Natl. Acad. Sci. U.S.A*. **113**, 9882-9887 (2016).
38. Dietrich, F. S. et al. The *Ashbya gossypii* genome as a tool for mapping the ancient *Saccharomyces cerevisiae* genome. *Science* **304**, 304-307 (2004).
39. Dujon, B. et al. Genome evolution in yeasts. *Nature* **430**, 35-44 (2004).
40. Gordon, J. L. et al. Evolutionary erosion of yeast sex chromosomes by mating-type switching accidents. *Proc. Natl. Acad. Sci. U.S.A*. **108**, 20024-20029 (2011).
41. Engel, S. R. et al. New data and collaborations at the *Saccharomyces* genome database: updated reference genome, alleles, and the Alliance of Genome Resources. *Genetics* **220**, iyab224 (2022).
42. Piškur, J.et al. The genome of wine yeast *Dekkera bruxellensis* provides a tool to explore its food-related properties. *Int. J. Food Microbiol*. **157**, 202-209 (2012).
43. De Schutter, K. et al. Genome sequence of the recombinant protein production host *Pichia pastoris*. *Nat. Biotechnol*. **27**, 561-566 (2009)
44. <http://www.candidagenome.org/download/sequence/C_albicans_SC5314/Assembly22/current/>
45. <http://www.candidagenome.org/download/sequence/L_elongisporus_NRLL_YB-4239/current/>
46. Butler, G. et al. Evolution of pathogenicity and sexual reproduction in eight *Candida* genomes. *Nature* **459**, 657-662 (2009).
47. Jeffries, T. W. et al. Genome sequence of the lignocellulose-bioconverting and xylose-fermenting yeast *Pichia stipitis*. *Nat. Biotechnol*. **25**, 319-326 (2007).
48. Takashima, M.et al. Recognition and delineation of yeast genera based on genomic data: Lessons from Trichosporonales. *Fungal Genet. Biol*. **130**, 31-42 (2019).
49. Kunze, G.et al. The complete genome of *Blastobotrys (Arxula) adeninivorans* LS3 - a yeast of biotechnological interest. *Biotechnol Biofuels*. **7**, 66 (2014).
50. Bellasio, M.et al. Complete genome sequence and transcriptome regulation of the pentose utilizing yeast *Sugiyamaella lignohabitans*. *FEMS Yeast Res*. **16**, fow037 (2016)
51. Rhind, N.et al. Comparative functional genomics of the fission yeasts. *Science* **332**, 930-936 (2011).
52. Wood, V. et al. The genome sequence of *Schizosaccharomyces pombe*. *Nature* **415**, 871-880 (2002). Erratum in: *Nature* **421**, 94 (2003).
53. Ma, L. et al. Genome analysis of three *Pneumocystis* species reveals adaptation mechanisms to life exclusively in mammalian hosts. *Nat. Commun*. **7**, 10740 (2016).
54. Mondo, S. J. et al. Widespread adenine N6-methylation of active genes in fungi. *Nat. Genet*. **49**, 964-968 (2017).
55. Cissé, O. H.et al. Genome sequencing of the plant pathogen *Taphrina deformans*, the causal agent of peach leaf curl. *mBio* **4**, e00055-13 (2013).
56. Nguyen, T. A.et al. Innovation and constraint leading to complex multicellularity in the Ascomycota. *Nat. Commun*. **8**, 14444 (2017).
57. Stajich, J. E. et al. Insights into evolution of multicellular fungi from the assembled chromosomes of the mushroom *Coprinopsis cinerea* (*Coprinus cinereus*). *Proc. Natl. Acad. Sci. U.S.A*. **107**, 11889-11894 (2010).
58. Ohm, R. A.et al. Genome sequence of the model mushroom *Schizophyllum commune*. *Nat. Biotechnol.* **28**, 957-963 (2010).
59. Martin, F.et al. The genome of *Laccaria bicolor* provides insights into mycorrhizal symbiosis. *Nature* **452**, 88-92 (2008).
60. Floudas, D.et al. The Paleozoic origin of enzymatic lignin decomposition reconstructed from 31 fungal genomes. *Science* **336**, 1715-1719 (2012).
61. Cubeta, M. A.et al. Draft genome sequence of the plant-pathogenic soil fungus *Rhizoctonia solani* anastomosis group 3 strain Rhs1AP. *Genome Announc*. **2**, e01072-14 (2014).
62. Nagy, L. G. et al. Comparative genomics of early-diverging mushroom-forming fungi provides insights into the origins of lignocellulose decay capabilities. *Mol. Biol. Evol.* **33**, 959-970 (2016).
63. Ohm, R. A.et al. Genomics of wood-degrading fungi. *Fungal Genet. Biol*. **72**, 82-90 (2014).
64. Olson, Å.et al. Insight into trade-off between wood decay and parasitism from the genome of a fungal forest pathogen. *New Phytol*. **194**, 1001-1013 (2012).
65. Takashima, M., Manabe, R. I. & Ohkuma, M. Draft genome sequences of Basidiomycetous epiphytic phylloplane yeast type strains *Dioszegia crocea* JCM 2961 and *Dioszegia aurantiaca* JCM 2956. *Microbiol. Resour. Announc.* **8**, e01727-18 (2019).
66. Takashima, M. et al., A Trichosporonales genome tree based on 27 haploid and three evolutionarily conserved 'natural' hybrid genomes. *Yeast* **35**, 99-111 (2018).
67. Loftus, B. J. et al. The genome of the basidiomycetous yeast and human pathogen *Cryptococcus neoformans*. *Science* **307**, 1321-1324 (2005).
68. Takashima, M., Manabe, R. I. & Ohkuma, M. Draft genome sequence of oleaginous yeast *Saitozyma* sp. strain JCM 24511, isolated from soil on Iriomote island, Okinawa, Japan. *Microbiol. Resour. Announc*. **9**, e00196-20 (2020).
69. Cho, O. et al. Draft genome sequence of the causative antigen of summer-type hypersensitivity pneumonitis, *Trichosporon domesticum* JCM 9580. *Genome Announc*. **4**, e00651-16 (2016).
70. Kourist,R. et al., Genomics and transcriptomics analyses of the oil-accumulating basidiomycete yeast *Trichosporon oleaginosus*: Insights into substrate utilization and alternative evolutionary trajectories of fungal mating systems. *mBio* **6**, e00918 (2015).
71. Sriswasdi, S. et al. Global deceleration of gene evolution following recent genome hybridizations in fungi. *Genome Res*. **26**, 1081-1090 (2016).
72. Zajc, J. et al. Genome and transcriptome sequencing of the halophilic fungus *Wallemia ichthyophaga*: haloadaptations present and absent. *BMC Genomics*. **14**, 617 (2013).
73. Padamsee, M. et al. The genome of the xerotolerant mold *Wallemia sebi* reveals adaptations to osmotic stress and suggests cryptic sexual reproduction. *Fungal Genet. Biol.* **49**, 217-226 (2012).
74. Kobayashi, Y.et al. Whole-genome based phylogeny and comparative genomics of Sporidiobolales and related taxa of Basidiomycetes. *IMA Fungus*. ***16***, e141626 (2025).
75. Zhu, Z.et al. A multi-omic map of the lipid-producing yeast *Rhodosporidium toruloides*. *Nat. Commun*. **3**, 1112 (2012).
76. Duplessis, S. et al. Obligate biotrophy features unraveled by the genomic analysis of rust fungi. *Proc. Natl. Acad. Sci. U.S.A*. **108**, 9166-9171 (2011).
77. Toome, M.et al. Genome sequencing provides insight into the reproductive biology, nutritional mode and ploidy of the fern pathogen *Mixia osmundae*. *New Phytol.* **202**, 554-564 (2014).
78. Saika, A. et al. Draft genome sequence of the yeast *Pseudozyma antarctica* type strain JCM 10317, a producer of the glycolipid biosurfactants, mannosylerythritol lipids. *Genome Announc*. **2**, e00878-14 (2014).
79. Laurie, J. D. et al. Genome comparison of barley and maize smut fungi reveals targeted loss of RNA silencing components and species-specific presence of transposable elements. *Plant Cell* **24**, 1733-1745 (2012).
80. Kämper, J. et al*.* Insights from the genome of the biotrophic fungal plant pathogen *Ustilago maydis*. *Nature* **444**, 97-101 (2006).
81. Toome, M.et al. Draft genome sequence of a rare smut relative, *Tilletiaria anomala* UBC 951. *Genome Announc.* **2**, e00539-14 (2014).
82. Nguyen, H. D. T., Sultana, T., Kesanakurti, P. & Hambleton, S. Genome sequencing and comparison of five *Tilletia* species to identify candidate genes for the detection of regulated species infecting wheat. *IMA Fungus* **10**, 11 (2019).
83. Xu, J. et al. Dandruff-associated *Malassezia* genomes reveal convergent and divergent virulence traits shared with plant and human fungal pathogens. *Proc. Natl. Acad. Sci. U.S.A.* **104**, 18730-18735 (2007).
84. Sun, X. et al. Genome and evolution of the arbuscular mycorrhizal fungus *Diversispora epigaea* (formerly *Glomus versiforme*) and its bacterial endosymbionts. *New Phytol.* **221**, 1556-1573 (2019).
85. Ma, L. J. et al. Genomic analysis of the basal lineage fungus *Rhizopus oryzae* reveals a whole-genome duplication. *PLoS Genet*. **5**, e1000549 (2009).
86. Corrochano, L. M.et al. Expansion of signal transduction pathways in fungi by extensive genome duplication. *Curr. Biol.* **26**, 1577-1584 (2016).
87. Chang, Y. et al. Phylogenomic analyses indicate that early fungi evolved digesting cell walls of algal ancestors of land plants. *Genome Biol. Evol*. **7**, 1590-1601 (2015).
88. Ahrendt, S. R.et al. Leveraging single-cell genomics to expand the fungal tree of life. *Nat. Microbiol.* 3, 1417-1428 (2018).
89. Russ, C.et al. Genome sequence of *Spizellomyces punctatus*. *Genome Announc*. **4**, e00849-16 (2016).
90. Haitjema, C. H.et al. A parts list for fungal cellulosomes revealed by comparative genomics. *Nat. Microbiol.* **2**, 17087 (2017).
91. James, T. Y.et al. Shared signatures of parasitism and phylogenomics unite Cryptomycota and microsporidia. *Curr. Biol.* **23**, 1548-1553 (2013).
92. Katinka, M. D.et al. Genome sequence and gene compaction of the eukaryote parasite *Encephalitozoon cuniculi*. *Nature* **414**, 450-453 (2001).
93. Desjardins, C. A. et al. Contrasting host-pathogen interactions and genome evolution in two generalist and specialist microsporidian pathogens of mosquitoes. *Nat. Commun*. **6**, 7121 (2015).
