# Supplementary material
Source: Research Square preprint supplement (doi:10.21203/rs.3.rs-8904859/v1)
Supplement: Supplementary file 3 [file 28f2bcec7920edbf48633edb.xlsx]

## Sheet: S3
Supplementary Table 3. OGs shared among clusters based on cluster analysis using Yule coefficients.
a-1) Result of Fisher's exact test*
cluster	present*	absent*	taxon
1 (n=2)	259	1450	Microsporidia
2 (n=137)	53	35	Ascomycota
3 (n=15)	32	5	early diverging lineages except Microsporidia
4 (n=105)	82	42	Basidiomycota
*, # of characteristically present and characteristically absent OGs (> 0.9 with p-value < 0.05).
	a-2) Clusters 1 and 3 hold commonly characteristically absent OGs
	cluster	1	3
	1		2
	3	0
	lower left, commonly characteristically present; upper right, commonly characteristically absent.
	a-3) Clusters 2 and 4 hold characteristic OGs
	cluster		present*
			2	4
	absent*	2	-	13
		4	11	-
b-1) Ascomycota could be divided further based on phylogeny
cluster	present*	absent*	taxon
2-1 (n=65)	2	1	Saccharomycotina and Taphrinomycotina
2-2 (n=72)	321	6	Pezizomycotina
2-1-1 (n=54)	34	17	Saccharomycotina
2-1-2 (n=11)	2	0	Taphrinomycotina
*, # of characteristically present and characteristically absent OGs (> 0.9 with p-value < 0.05).
c-1) Tentative groups among Basidiomycota
cluster	present*	absent*	taxon
4-1 (n=2)	88	1902	Tremella mesenterica
4-2 (n=17)	12	129	Agaricomycetes and Dacrymycetes
4-3 (n=45)	7	50	Tremellomycetes other than T. mesenterica and Cystofilobasidialses
4-4 (n=2)	84	519	Pucciniomycetes
4-5 (n=7)	18	88	Cystofilobasidiales
4-6 (n=2)	226	307	Wallemiomycotina
4-7 (n=15)	57	49	Ustilaginomycotina
4-8 (n=15)	58	42	Agaricostilbomycetes, Cystobasidiomycetes, Microbotryomycetes and Mixiomycetes
*, # of characteristically present and characteristically absent OGs (> 0.9 with p-value < 0.05).
	c-2) Clusters 4-1, 4-4, 4-5 and 4-6 hold commonly characteristic OGs
		4-1	4-4	4-5	4-6
	4-1	-	6	na	9
	4-4	1	-	na	24
	4-5	na	na	-	na
	4-6	1	2	1	-
	lower left, commonly characteristically present; upper right, commonly characteristically absent.
	c-3) Clusters 4-1, 4-4 and 4-6 hold one commonly characteristically absent OG
	cluster	4-1
		4-4
		4-6
	absent	1
