# Supplementary material
Source: Research Square preprint supplement (doi:10.21203/rs.3.rs-8904859/v1)
Supplement: Supplementary file 4 [file a24268451a0338d8955ad1ef.xlsx]

## Sheet: S2
Supplementary Table 2. Distribution of OGs involved in chitin synthesis and degradation.
		Ascomycota			Basidiomycota				early diverging lineages (n=17)		in Taphrinomycotina1												protein ID	gene description in a reference genome	reference genome used2	remarks
	OG ID	Pezizo-mycotina (n=72)	Saccharo-mycotina (n=54)	Taphrino-mycotina (n=11)	Agarico-mycotina (n=71)	Wallemio-mycotina (n=2)	Puccinio-mycotina (n=17)	Ustilagino-mycotina (n=15)			Pneu. carinii	Pneu. jirovecii	Pneu. murina	Schi. pombe	Schi. cryophilus	Schi. japonicus	Schi. octosporus	Pro. lactucaedebili	T. deformans	Sai. complicata	N. irregularis
chitin synthase	OG0000160	72	54	3	71	2	17	15	17		0	0	0	0	0	0	0	1	0	1	1		NP_009579.1	chitin synthase III	S. cerevisiae	including classes 1, 3, 4, 5, 6, 7, 8, D, F
	OG0000198	72	54	7	71	2	17	15	14		0	0	0	1	1	1	1	1	0	1	1		NP_014207.2	chitin synthase I	S. cerevisiae	including classes 1, 2, 3, 4, 6, 7, 8, A, B, C, G
	OG0005756	69	2	1	0	0	0	0	2		0	0	0	0	0	0	0	0	0	1	0		XP_752630.1	chitin synthase D	A. fumigatus
	OG0005217	19	0	0	5	0	1	0	0		0	0	0	0	0	0	0	0	0	0	0		XP_008602641.1	chitin synthase	B. bassiana
	OG0006130	30	6	1	8	0	11	9	3		0	0	0	0	0	0	0	0	1	0	0		EKG14540.1	fungal chitin synthase	Mac. phaseolina
	OG0006803	23	0	1	5	0	2	4	8		0	0	0	0	0	0	0	0	0	1	0		EKG22605.1	fungal chitin synthase	Mac. phaseolina
chitinase	OG0000107	72	52	3	71	2	17	15	15		0	0	0	0	0	0	0	1	0	1	1		NP_010659.1	putative chitinase	S. cerevisiae
	OG0000670	71	50	8	18	0	2	0	13		0	0	0	1	1	1	1	1	1	1	1		NP_013388.1	endochitinase	S. cerevisiae
	OG0000963	71	16	3	63	2	14	10	13		0	0	0	0	0	0	0	0	1	1	1		XP_006969176.1	glycoside hydrolase family 20_chitinase	T. reesei
	OG0003542	9	0	0	64	0	0	10	2		0	0	0	0	0	0	0	0	0	0	0		XP_006964800.1	glycoside hydrolase family 18_chitinase	T. reesei
	OG0003973	47	7	0	1	0	0	0	2		0	0	0	0	0	0	0	0	0	0	0		XP_751248.1	class V chitinase	A. fumigatus
	OG0005016	65	0	1	10	0	0	0	0		0	0	0	0	0	0	0	1	0	0	0		XP_747959.2	class III chitinase	A. fumigatus
	OG0007564	1	0	0	0	0	0	0	7		0	0	0	0	0	0	0	0	0	0	0		XP_955684.1	endochitinase	E. cuniculi
chitin deacetylase	OG0000085	71	53	4	71	2	17	15	16		0	0	0	0	0	0	0	1	1	1	1		NP_013410.1	chitin deacetylase	S. cerevisiae
	OG0001148	62	9	2	62	0	12	5	4		0	0	0	0	0	0	0	1	0	1	0		OMP89339.1	chitin deacetylase 1_ partial	D. seriata
	OG0003913	30	11	5	20	0	6	14	2		0	0	0	1	1	1	1	0	0	1	0		NP_594418.1	chitin deacetylase Cda1	Schi. pombe
	OG0005151	0	0	0	21	0	10	11	11		0	0	0	0	0	0	0	0	0	0	0		OAC98992.1	chitin deacetylase_ partial	Muc. circinelloides
	OG0008187	0	0	0	17	0	15	2	0		0	0	0	0	0	0	0	0	0	0	0		XP_001838434.2	chitin deacetylase	C. cinerea
	OG0008233	30	0	0	0	0	0	0	0		0	0	0	0	0	0	0	0	0	0	0		OMP87963.1	chitin deacetylase	D. seriata
	present in >90% species
	present in >60% and <=90 species
	present in >30% and <=60 species
1, N., Neolecta; Pneu., Pneumocystis; Pro., Protomyces; Sai., Saitoella; Schi., Schizosaccharomyces; T., Taphrina.
2, A., Aspergillus; B., Beauveria; C., Coprinopsis; D., Diplodia; E., Encephalitozoon; Mac., Macrophomina; Muc., Mucor; S., Saccharomyces; Schi., Schizosaccharomyces; T., Trichoderma.
