# Supplementary material
Source: Research Square preprint supplement (doi:10.21203/rs.3.rs-8904859/v1)
Supplement: Supplementary file 5 [file d1a4204f14c7f38e78b85034.xlsx]

## Sheet: S5a
Supplementary Table 5a. OGs that characterise Pezizomycotina (characteristically present and characteristically absent OGs).
present/absent	OG ID	Genbank			UniProt				Model organism				Alphafold												Pezizomycotina (72)	Saccharomycotina (54)	Taphrinomycotina (11)	Agaricomycotina (71)	Wallemiomycotina (2)	Pucciniomycotina (17)	Ustilaginomycotina (15)	early-diverging lineages (17)		Drosophila melanogaster	Dictyostelium discoideum	Homo sapiens	Arabidopsis thaliana	Caenorhabditis elegans
													AFDB50/MMseqs2						AFDB/Foldseek
		representative protein ID	gene description in a reference genome	domain search result	ID	protein name	GO	reference genome used1	ID	protein name	GO	reference genome used	# of accessions found	Average pLDDT	UniProt ID	protein name	GO	reference genome used	# of accessions found	Average pLDDT	UniProt ID	protein name	GO	reference genome used
present	OG0005559	XP_960708.1	hypothetical protein NCU01356		Q1K6N8	Molybdate transporter 1	GO:0005774 GO:0015098 GO:0090414	N. crassa																	68	0	0	2	0	0	0	10		0	0	0	1	0
	OG0005141	XP_963822.1	N-acylethanolamine amidohydrolase	GatA; Asp-tRNAAsn/Glu-tRNAGln amidotransferase A subunit or related amidase [Translation, ribosomal structure and biogenesis]; COG0154	Q7SCV1	N-acylethanolamine amidohydrolase	GO:0003824	N. crassa																	67	0	0	0	0	0	0	9		0	1	0	1	0
	OG0000194	XP_011393959.1	hypothetical protein NCU08550	BTB_POZ_ZBTB_KLHL-like; BTB (Broad-Complex, Tramtrack and Bric a brac)/POZ (poxvirus and zinc finger) domain found in zinc finger and BTB domain-containing (ZBTB) proteins, Kelch-like (KLHL) proteins, and similar proteins; cd18186	U9W5H2	BTB domain-containing protein	na	N. crassa	Q54RA9	BTB/POZ domain-containing protein	GO:0043327 GO:0031153 GO:0030587	Dictyostelium discoideum													72	0	0	0	0	0	0	4		1	1	0	0	1
	OG0000038	XP_747104.1	HET domain-containing protein		Q4WB46	HET domain protein	na	A. fumigatus					2497	90.12	A0A0A1UQP6	Heterokaryon incompatibility protein	na	Metarhizium robertsii	1951	90.94	W7MGC8	Heterokaryon incompatibility domain-containing protein	na	Gibberella moniliformis	68	0	0	3	0	0	0	4		0	0	0	1	0
	OG0004807	XP_957127.1	hypothetical protein NCU06487	PHA03247; large tegument protein UL36; Provisional, C2H2 Zn finger; C2H2 Zn finger [structural motif]	Q7RYI7	C2H2-type domain-containing protein [GO]	GO:0000981 GO:0000978 GO:0006357	N. crassa																	68	0	0	0	0	0	0	2		0	0	0	0	1
	OG0003723	XP_011393786.1	oxidoreductase, variant	2OG-FeII_Oxy; 2OG-Fe(II) oxygenase superfamily; cl21496	U9W4Y3	Oxidoreductase, variant	GO:0051213 GO:0005506 GO:0031418 GO:0016705	N. crassa																	65	0	0	0	0	0	0	2		1	1	1	1	1
	OG0005803	XP_750544.1	WW domain protein		Q4WNF8	WW domain protein	GO:0016020 GO:0016740	A. fumigatus																	72	2	0	0	0	0	0	2		0	0	0	0	0
	OG0006173	XP_958478.1	hypothetical protein NCU07394	-	Q7S1M0	Cytoskeleton-associated protein	GO:0016020	N. crassa																	68	0	0	0	0	0	0	1		0	0	0	0	0
	OG0006220	XP_964558.1	hypothetical protein NCU00724	-	Q7SES2	MARVEL domain-containing protein	GO:0016020	N. crassa																	65	0	0	0	0	0	0	1		0	0	0	0	0
	OG0006004	XP_964655.1	hypothetical protein NCU02033	PHA03378; EBNA-3B; Provisional, EAF; RNA polymerase II transcription elongation factor; pfam09816, ;	Q7SF38	Transcription elongation factor Eaf N-terminal domain-containing protein	na	N. crassa					5	54.57	A0A2H3GXV6	Fork-head domain-containing protein	GO:0005634 GO:0003700 GO:0043565 GO:0060962	Fusarium oxysporum f. sp. radicis-cucumerinum	5	58.62	A0A7S4QSC7	SMP-LTD domain-containing protein	GO:0016020 GO:0008289 GO:0006869	Ditylum brightwellii	70	0	0	0	0	0	0	1		0	0	0	0	0
	OG0005999	XP_963699.1	hypothetical protein NCU09362	-	Q7SCJ2	Uncharacterized protein	GO:0016020	N. crassa																	67	0	0	0	0	0	0	1		0	0	0	0	0
	OG0006226	XP_964871.1	hypothetical protein NCU02006	-	Q7SFM6	Apopolysialoglycoprotein	GO:0005730	N. crassa																	66	0	0	0	0	0	0	1		0	0	0	0	0
	OG0006303	XP_008596543.1	Ribosomal RNA adenine methylase transferase	-	J4KPH1	Mitochondrial transcription factor 1	GO:0008168 GO:0003723 GO:0032259	B. bassiana																	65	0	0	0	0	0	0	1		0	0	0	0	0
	OG0004575	XP_748790.2	C6 finger domain protein, putative		Q4WH39	C6 finger domain protein, putative	GO:0005634 GO:0003677 GO:0000981 GO:0008270	A. fumigatus																	71	1	0	3	0	0	0	1		0	0	0	0	0
	OG0001688	XP_003709268.1	uncharacterized protein MGG_02474		G4MRY7	C2H2-type domain-containing protein	GO:0005634 GO:0008270 GO:0006357	P. oryzae																	72	0	0	3	0	0	0	1		0	0	0	0	0
	OG0003862	EAA31498.2	hypothetical protein NCU03654		Q1K6Q2	BZIP domain-containing protein	GO:0003700	N. crassa																	70	1	0	3	0	0	0	1		0	0	0	0	0
	OG0005914	CCU83101.1	hypothetical protein BGHDH14_bgh04373		N1JR40	Uncharacterized protein	na	B. hordei					557	73	A0A1S9DBR3	Major intrinsic protein	GO:0005886 GO:0015254 GO:0015250	Aspergillus oryzae	106	75.12	A0A3M7MRA1	Zn(2)-C6 fungal-type domain-containing protein	GO:0005634 GO:0003677 GO:0001228 GO:0008270	Chaetothyriales sp.	69	2	0	0	0	0	0	1		0	0	0	0	0
	OG0004977	XP_008600803.1	uncharacterized protein BBA_07484		J5JBU5	DUF2293 domain-containing protein	na	B. bassiana					220	55.09	A0A1C1CUV7	DUF2293 domain-containing protein	na	Cladophialophora carrionii	52	54.37	A0A175W238	DUF2293 domain-containing protein	na	Madurella mycetomatis	69	0	0	1	0	0	0	1		0	0	0	0	0
	OG0001087	XP_752701.1	bZIP transcription factor		E9RCZ7	BZIP transcription factor, putative	GO:0003700	A. fumigatus																	68	0	0	1	0	0	0	1		0	0	0	0	0
	OG0005915	XP_964348.1	hypothetical protein NCU01984	-	Q7SE76	5-Methylcytosine G/T mismatch-specific DNA glycosylase	GO:0005634 GO:0003677	N. crassa																	72	0	0	0	0	0	0	0		0	0	0	0	0
	OG0005530	XP_011394949.1	hypothetical protein NCU05508	SKIP_SNW; SKIP/SNW domain; pfam02731	V5IM19	Vegetative cell wall protein gp1	na	N. crassa					336	70.69	A0A7R8A9U9	Vegetative cell wall protein gp1	na	Aspergillus kawachii	54	73	A0A5N6F8W3	Vegetative cell wall protein gp1	na	Aspergillus novoparasiticus	72	0	0	0	0	0	0	0		0	0	0	0	0
	OG0006066	XP_960306.1	hypothetical protein NCU07123	U2AF_lg; U2 snRNP auxilliary factor, large subunit, splicing factor; TIGR01642	Q7S6C9	Uncharacterized protein	GO:0005634 GO:0061630 GO:0016567 GO:0006511	N. crassa																	72	0	0	0	0	0	0	0		0	0	0	0	0
	OG0006065	XP_960294.1	hypothetical protein NCU04761	-	Q7S692	Beta-lactamase-type transpeptidase fold domain containing protein	na	N. crassa					30	60.75	M7T3D0	Putative beta-lactamase-type transpeptidase fold domain containing protein	na	Eutypa lata	6	61.12	A0A2P5HHY2	Beta-lactamase-type transpeptidase fold domain-containing protein	na	Diaporthe helianthi	72	0	0	0	0	0	0	0		0	0	0	0	0
	OG0006058	XP_965657.2	hypothetical protein NCU02526	-	Q7SHT7	Uncharacterized protein	na	N. crassa					56	59.19	A0A6A6SX16	Pal1-domain-containing protein	na	Lophiostoma macrostomum	20	59.19	A0A177BYF2	Pal1-domain-containing protein	na	Lophiostoma macrostomum	72	0	0	0	0	0	0	0		0	0	0	0	0
	OG0006056	XP_963858.1	hypothetical protein NCU03088	-	Q7SCZ8	Uncharacterized protein	GO:0016020	N. crassa																	72	0	0	0	0	0	0	0		0	0	0	0	0
	OG0006051	XP_964176.3	hypothetical protein NCU03083	-	Q7SDS7	Uncharacterized protein	GO:0016020	N. crassa																	72	0	0	0	0	0	0	0		0	0	0	0	0
	OG0005985	XP_959031.1	hypothetical protein NCU09003	PHA03247; large tegument protein UL36; Provisional	Q7S2W7	Cep57 centrosome microtubule-binding domain-containing protein	na	N. crassa	Q55FT9	Abl interactor homolog	GO:0098858 GO:0031252 GO:0005911 GO:0032433 GO:0030027 GO:0031143 GO:0031209 GO:0035591 GO:0048870 GO:0043326 GO:0045184 GO:0046847 GO:0000281 GO:0031269 GO:0030587	Dictyostelium discoideum													72	0	0	0	0	0	0	0		0	1	0	0	0
	OG0005910	XP_965124.3	transcription factor RfeD	RING_Ubox; RING finger (Really Interesting New Gene) domain and U-box domain superfamily; cl17238	Q7SGB0	Transcription factor RfeD	na	N. crassa					264	54.06	A0A3M9YN69	RING-type domain-containing protein	na	Verticillium nonalfalfae	22	59.73	A0A175W7S8	Transcription factor RfeD	na	Madurella mycetomatis	72	0	0	0	0	0	0	0		0	0	0	0	0
	OG0005905	XP_963331.1	hypothetical protein NCU06857	leucine-rich repeat; leucine-rich repeat [structural motif]	Q1K8J8	F-box domain-containing protei	GO:0003729	N. crassa																	72	0	0	0	0	0	0	0		0	0	0	0	0
	OG0006121	XP_964676.1	hypothetical protein NCU09241	GTPBP1_like; GTP binding protein 1 (GTPBP1)-like family includes GTPBP2; cd04165	Q7SF69	Tr-type G domain-containing protein	GO:0005525 GO:0003924 GO:0003746 GO:0006414	N. crassa																	71	0	0	0	0	0	0	0		0	0	0	0	0
	OG0006114	XP_960882.2	hypothetical protein NCU06649	Nucleopor_Nup85; Nup85 Nucleoporin; pfam07575	Q7S7I2	Nuclear pore complex protein Nup85	GO:0031965 GO:0031080 GO:0017056 GO:0006406 GO:0045893 GO:0006606	N. crassa																	71	0	0	0	0	0	0	0		0	0	0	0	0
	OG0006062	XP_960564.1	hypothetical protein NCU05602	RRM_SF; RNA recognition motif (RRM) superfamily; cl17169	Q7S6W3	RRM domain-containing protein	GO:0003676	N. crassa																	71	0	0	0	0	0	0	0		0	0	0	0	0
	OG0005958	XP_961327.1	GTP-binding protein EsdC	CBM_2; Starch binding domain; smart01065	Q1K7S2	GTP-binding protein EsdC	na	N. crassa					377	67.81	A0A4U0UF75	SHD domain-containing protein	GO:0006897	Salinomyces thailandica	52	65.94	G8C1U5	AMP-activated protein kinase glycogen-binding domain-containing protein	GO:0005737 GO:0031588 GO:0005634 GO:0019901 GO:0007165	Tetrapisispora phaffii	71	0	0	0	0	0	0	0		0	0	0	0	0
	OG0006128	XP_956369.1	hypothetical protein NCU03480	PHA03247; large tegument protein UL36; Provisional, TAF4; TATA Binding Protein (TBP) Associated Factor 4 (TAF4) is one of several TAFs that bind TBP and is involved in forming Transcription Factor IID (TFIID) complex; cl05005, ;	Q1K508	Transcription initiation factor TFIID subunit 4	GO:0005669 GO:0006352	N. crassa																	71	0	0	0	0	0	0	0		0	0	0	0	0
	OG0006127	XP_960513.2	hypothetical protein NCU05551	COX14; Cytochrome oxidase c assembly; pfam14880	Q7S712	Cytochrome oxidase c assembly-domain-containing protein	GO:0016020	N. crassa																	71	0	0	0	0	0	0	0		0	0	0	0	0
	OG0006124	XP_956773.1	hypothetical protein NCU00454	-	Q7RXZ0	Uncharacterized protein	na	N. crassa					91	65.38	S3CLD5	Reticulocyte-binding protein 2 like protein a	na	Ophiostoma piceae	22	66.56	A0A447CL63	Uncharacterized protein	GO:0005884 GO:0030041	Podospora comata	71	0	0	0	0	0	0	0		0	0	0	0	0
	OG0006119	XP_963861.2	hypothetical protein NCU03091	-	Q7SCZ5	Uncharacterized protein	GO:0016020	N. crassa																	71	0	0	0	0	0	0	0		0	0	0	0	0
	OG0006100	XP_011393739.1	hypothetical protein NCU00068	Herpes_BLLF1; Herpes virus major outer envelope glycoprotein (BLLF1); pfam05109	U9W307	Uncharacterized protein	GO:0005737 GO:0006914 GO:0042594	N. crassa																	71	0	0	0	0	0	0	0		0	0	0	0	0
	OG0006097	XP_958560.2	hypothetical protein NCU09056	-	Q7S1U3	Nucleoporin NUP37	na	N. crassa					53	69.81	H6C4K4	Nucleoporin NUP37	na	Exophiala dermatitidis	14	37.44	A0A3M0K270	Protein NPAT C-terminal domain-containing protein	GO:0005634 GO:0003712	Hirundo rustica rustica	71	0	0	0	0	0	0	0		0	0	0	0	0
	OG0006096	XP_959916.1	hypothetical protein NCU02272	Med15; ARC105 or Med15 subunit of Mediator complex non-fungal; pfam09606	Q7S594	Uncharacterized protein	na	N. crassa					94	51	A0A6I9UUU0	Stromal interaction molecule homolog isoform X3	GO:0005783 GO:0005886 GO:0005246 GO:0005509 GO:0006874 GO:0051049 GO:0002115	Bactrocera dorsalis	34		A0A507CSH0	LIM zinc-binding domain-containing protein	GO:0046872	Synchytrium endobioticum	71	0	0	0	0	0	0	0		0	0	0	0	0
	OG0006054	XP_964738.1	hypothetical protein NCU00577	-	Q7SF73	Transcriptional activator	na	N. crassa					281	62.25	A0A6G1I865	SAGA-associated factor 11	GO:0071819 GO:0000124 GO:0046872 GO:0003713 GO:0006357	Trichodelitschia bisporula	54	64.95	A0A175W9E5	SAGA-associated factor 11	na	Madurella mycetomatis	71	0	0	0	0	0	0	0		0	0	0	0	0
	OG0006052	XP_961455.1	hypothetical protein NCU03679	-	Q1K810	Endosomal spry domain-containing protein	GO:0016020	N. crassa																	71	0	0	0	0	0	0	0		0	0	0	0	0
	OG0006050	XP_964818.2	hypothetical protein NCU08610	-	Q7SFK8	Uncharacterized protein	na	N. crassa					100	57.16	A0A293LAU4	Ubinuclein-2	GO:0005634	Ornithodoros erraticus	44	58.03	A0A2R5LEE0	Putative ubinuclein nuclear protein	GO:0005634	Ornithodoros turicata	71	0	0	0	0	0	0	0		0	0	0	0	0
	OG0006046	XP_963978.2	hypothetical protein NCU02641	-	Q7SDA5	Uncharacterized protein	GO:0016020	N. crassa																	71	0	0	0	0	0	0	0		0	0	0	0	0
	OG0006042	XP_011394263.1	hypothetical protein NCU07695	-	V5IMC8	Uncharacterized protein	na	N. crassa					29	52.06	A0A7J6GGW7	CCHC-type domain-containing protein	na	Cannabis sativa	16	55.81	A0A2T4CG89	Transmembrane protein	GO:0016020	Trichoderma longibrachiatum	71	0	0	0	0	0	0	0		0	0	0	0	0
	OG0006003	XP_961413.1	hypothetical protein NCU01327	Smc; Chromosome segregation ATPase [Cell cycle control, cell division, chromosome partitioning]; COG1196	Q1K7U4	M protein repeat protein	na	N. crassa					8	72.94	A0A0A1T391	M protein repeat protein	GO:0110085 GO:0032982 GO:0016460 GO:0051015 GO:0000146 GO:1902404 GO:0006936	Torrubiella hemipterigena	5	75.81	A0A6P6YHG0	Trichohyalin-like	GO:0005814 GO:0036064 GO:0097539 GO:0060271 GO:0090162	Dermatophagoides pteronyssinus	71	0	0	0	0	0	0	0		0	0	0	0	0
	OG0005954	XP_011393172.1	hypothetical protein NCU07425	WD40; WD40 repeat [General function prediction only], COG5373; Uncharacterized membrane protein [Function unknown], PRK12323; DNA polymerase III subunit gamma/tau	V5IR79	Uncharacterized protein	na	N. crassa					468	76.62	A0A4Z2CQM4	Acylamino-acid-releasing enzyme	GO:0005737 GO:0005634 GO:0005524 GO:0003677 GO:0004386 GO:0004252 GO:0006310 GO:0006303 GO:0006508	Schistosoma japonicum	96	84.12	A0A812T5K4	Prolyl endopeptidase-like	GO:0005856 GO:0005794 GO:0003723 GO:0004252 GO:0006508	Symbiodinium natans	71	0	0	0	0	0	0	0		0	0	0	0	0
	OG0005801	XP_957259.1	hypothetical protein NCU00373	-	Q7RYT6	Uncharacterized protein	na	N. crassa					141		na		na		10		na		na		71	0	0	0	0	0	0	0		0	0	0	0	0
	OG0005498	XP_958692.1	hypothetical protein NCU07771	-	Q1K690	Thymidylate kinase	na	N. crassa					4	54.69	F8MED8	Thymidylate kinase	na	Neurospora tetrasperma	1	54.84	G4UFG7	Thymidylate kinase	na	Neurospora tetrasperma	71	0	0	0	0	0	0	0		0	0	0	0	0
	OG0004510	XP_955928.1	hypothetical protein NCU01495	PHA02682; ORF080 virion core protein; Provisional	Q1K4Q3	Uncharacterized protein	na	N. crassa					217	55.47	A0A179GXJ8	Hydroxyproline-rich glycoprotein DZ-HRGP	na	Purpureocillium lilacinum	100	52.19	A0A5J4YF30	Adenylate guanylate cyclase domain-containing	GO:0016020 GO:0009975 GO:0016849 GO:0006171 GO:0035556	Trebouxia sp. A1-2	71	0	0	0	0	0	0	0		0	0	0	0	0
	OG0006176	XP_960599.2	hypothetical protein NCU03840	14-3-3; 14-3-3 domain; cl02098	Q7S741	14-3-3 domain-containing protein	GO:0005737 GO:0007165	N. crassa																	70	0	0	0	0	0	0	0		0	0	0	0	0
	OG0006165	XP_008593893.1	choriogenin Hminor	transcriptional regulator ICP4; Provisional	J4KRH1	Choriogenin Hminor	na	B. bassiana					196	68.81	W2S4U3	Choriogenin Hminor	na	Cyphellophora europaea	62	61.84	N0DT79	Mitochondrial ribonuclease P catalytic subunit	GO:0030678 GO:0046872 GO:0004526 GO:0097745 GO:0001682	Physcomitrium patens	70	0	0	0	0	0	0	0		0	0	0	0	0
	OG0006109	XP_965632.1	hypothetical protein NCU02950	PHA03247; large tegument protein UL36; Provisional	Q7SHF4	RNA recognition motif-containing protein	na	N. crassa					179	65.62	A0A1L7U215	Related to hydroxyproline-rich glycoprotein	na	Fusarium mangiferae	21	65.38	R1GI70	Putative rna recognition motif-containing protein	na	Botryosphaeria parva	70	0	0	0	0	0	0	0		0	0	0	0	0
	OG0006055	XP_963707.1	woronin body major protein	PLN03107; eukaryotic translation initiation factor 5A; Provisional, S1_Hex1; Hex1, S1-like RNA-binding domain. Hex1 protein is the major component of the Woronin body in filamentous fungi. The Woronin body is a dense vesicle and plays a vital role in filamentous fungi cell integrity. When cell damage occurs, Woronin bodies seal...; cd04469, ;	P87252	Woronin body major protein	GO:0030428 GO:0140266 GO:0043022 GO:0003723 GO:0003746 GO:0045901 GO:0045905 GO:0006414	N. crassa																	70	0	0	0	0	0	0	0		0	0	0	0	0
	OG0005994	XP_964020.1	hypothetical protein NCU09316	-	Q7SDF5	Pre-mRNA splicing factor CLF1	GO:0016020	N. crassa																	70	0	0	0	0	0	0	0		0	0	0	0	0
	OG0005528	XP_958804.1	C6 finger domain-containing protein	GAL4; GAL4-like Zn(II)2Cys6 (or C6 zinc) binuclear cluster DNA-binding domain; smart00066	Q7S2G0	C6 finger domain-containing protein	GO:0005634 GO:0000981 GO:0008270	N. crassa																	70	0	0	0	0	0	0	0		0	0	0	0	0
	OG0004837	XP_960818.1	hypothetical protein NCU01281	-	Q7S7G1	Uncharacterized protein	na	N. crassa					143	76.62	H1V598	Transcription factor RfeG	na	Colletotrichum higginsianum	20	79.38	A0A093XVC4	Multifunctional CCA protein	na	Talaromyces marneffei	70	0	0	0	0	0	0	0		0	0	0	0	0
	OG0006178	XP_962273.1	hypothetical protein NCU06566	Herpes_BLLF1; Herpes virus major outer envelope glycoprotein (BLLF1); pfam05109	Q7S9H2	Uncharacterized protein	na	N. crassa					606	60	A0A0D2GVD1	SWR1-complex protein 4	GO:0035267 GO:0000812 GO:0003714 GO:0006338 GO:0006281 GO:0000122	Fonsecaea pedrosoi	222	59.03	A0A0D6EHG0	Enhancer of polycomb-like protein	GO:0035267 GO:0005634 GO:0032777 GO:0007049 GO:0006281 GO:0006357	Sporidiobolus salmonicolor	70	0	0	0	0	0	0	0		0	0	0	0	0
	OG0006177	XP_961159.1	hypothetical protein NCU04199	-	Q1K7D5	Uncharacterized protein	na	N. crassa					4	49.34	G4UDB3	Pal1-domain-containing protein	na	Neurospora tetrasperma	2	49.56	F8MBU4	Pal1-domain-containing protein	na	Neurospora tetrasperma	70	0	0	0	0	0	0	0		0	0	0	0	0
	OG0006175	XP_961314.3	nitrogen metabolic regulation protein nmr	NmrA; NmrA-like family; pfam05368	P23762	Nitrogen metabolite repression protein nmr	GO:0005634	N. crassa																	70	0	0	0	0	0	0	0		0	0	0	0	0
	OG0006174	XP_011393170.1	hypothetical protein NCU07416	-	V5IQW0	Uncharacterized protein	na	N. crassa					56	61.41	A0A0D2E6M3	Inhibitor of growth protein N-terminal histone-binding domain-containing protein	na	Exophiala xenobiotica	11		G2PZV5	Inhibitor of growth protein N-terminal histone-binding domain-containing protein	na	Thermothelomyces thermophilus	70	0	0	0	0	0	0	0		0	0	0	0	0
	OG0006171	XP_964723.1	hypothetical protein NCU00562	PLN02317; arogenate dehydratase	Q7SF87	MFS maltose permease	GO:0016020	N. crassa																	70	0	0	0	0	0	0	0		0	0	0	0	0
	OG0006168	XP_965429.1	hypothetical protein NCU02656	-	Q7SH72	BAG domain-containing protein	na	N. crassa					8	43.97	A0A1J7K5G6	Cep57 centrosome microtubule-binding domain-containing protein	na	Coniochaeta ligniaria	7	47.81	A0A0N1HIA5	BAG domain-containing protein	na	Phialophora attinorum	70	0	0	0	0	0	0	0		0	0	0	0	0
	OG0006162	XP_965459.1	hypothetical protein NCU02686	-	Q7SH43	Uncharacterized protein	na	N. crassa					4	73.5	G1ND61	Trichohyalin-plectin-homology domain-containing protein	na	Meleagris gallopavo	6	68	A0A699LHT6	Integrase, catalytic region, zinc finger, CCHC-type, peptidase aspartic, catalytic	GO:0016301	Tanacetum cinerariifolium	70	0	0	0	0	0	0	0		0	0	0	0	0
	OG0006159	XP_011393829.1	hypothetical protein NCU00398	PRK07003 ; DNA polymerase III subunit gamma/tau, Herpes_BLLF1; Herpes virus major outer envelope glycoprotein (BLLF1); pfam05109, ;	U9WGY9	Ubiquitin carboxyl-terminal hydrolase 19	na	N. crassa					17	54.94	A0A1X2IAV2	F/Y rich C-terminus-domain-containing protein	GO:0005634	Absidia repens	25	56.84	A0A4P9XTP2	F/Y rich C-terminus-domain-containing protein	GO:0005634 GO:0051726	Thamnocephalis sphaerospora	70	0	0	0	0	0	0	0		0	0	0	0	0
	OG0006157	XP_956485.1	hypothetical protein NCU01807	-	Q1K541	Uncharacterized protein	na	N. crassa					347	79.94	A0A6A6JE73	Transmembrane protein	GO:0016020	Westerdykella ornata	33	77.44	A0A4Z1PFZ0	Vacuolar import and degradation protein 27	GO:0016020	Venturia nashicola	70	0	0	0	0	0	0	0		0	0	0	0	0
	OG0006153	XP_957208.2	hypothetical protein NCU00084	-	Q7RYP3	Uncharacterized protein	na	N. crassa					89	71.12	A0A091SVG3	LisH domain and HEAT repeat-containing protein KIAA1468	GO:0055037 GO:0005802 GO:0032367	Pelecanus crispus	40	71.69	A0A2S4WFZ7	Tethering factor for nuclear proteasome STS1	GO:0005737 GO:0031965 GO:0070628 GO:0071630 GO:0031144 GO:0015031	Puccinia striiformis	70	0	0	0	0	0	0	0		0	0	0	0	0
	OG0006147	XP_011395170.1	hypothetical protein NCU02410	-	V5IKE5	HAUS augmin-like complex subunit 1	GO:0005829 GO:0070652 GO:0005874 GO:0005819 GO:0051301 GO:0051225	N. crassa																	70	0	0	0	0	0	0	0		0	0	0	0	0
	OG0006122	XP_965055.1	hypothetical protein NCU07508	-	Q7SG34	U1-type domain-containing protein	na	N. crassa					9	34.78	A0A640KBD1	Alpha tubulin	na	Leishmania tarentolae	5	51.88	A0A3N4LWU5	C2H2-type domain-containing protein	na	Terfezia boudieri	70	0	0	0	0	0	0	0		0	0	0	0	0
	OG0006115	XP_961435.2	hypothetical protein NCU01349	-	Q1K7S9	Uncharacterized protein	GO:0009277 GO:0031505	N. crassa																	70	0	0	0	0	0	0	0		0	0	0	0	0
	OG0006111	XP_965115.3	hypothetical protein NCU02730	-	Q7SGB9	Uncharacterized protein	na	N. crassa					129	56.16	A0A4Z1NY43	Gb	na	Venturia nashicola	43		na		na		70	0	0	0	0	0	0	0		0	0	0	0	0
	OG0006106	XP_961830.3	hypothetical protein NCU05265	PRK14951; DNA polymerase III subunits gamma and tau; Provisional	Q7S8C0	Uncharacterized protein	na	N. crassa					157	46.84	S2JDJ9	Uncharacterized protein	GO:0016020	Mucor circinelloides f. circinelloides	94	53.25	A0A0G2FF93	Putative myb-like dna-binding	GO:0034967 GO:0003677 GO:0003714 GO:0000122	Diaporthe ampelina	70	0	0	0	0	0	0	0		0	0	0	0	0
	OG0006104	XP_963570.1	hypothetical protein NCU08709	-	Q1K8W1	Uncharacterized protein	na	N. crassa					91		na		na		10		na		na		70	0	0	0	0	0	0	0		0	0	0	0	0
	OG0006095	XP_959719.3	hypothetical protein NCU02399	-	Q7S4N6	Uncharacterized protein	na	N. crassa					424	66.12	A0A093V5M5	UvrABC system protein B	na	Talaromyces marneffei	46	80.5	A0A162KNR9	Protein kinase-like domain protein	na	Akanthomyces lecanii	70	0	0	0	0	0	0	0		0	0	0	0	0
	OG0006048	XP_959661.2	hypothetical protein NCU08169	-	Q7S4I1	MARVEL domain-containing protein	GO:0016020	N. crassa																	70	0	0	0	0	0	0	0		0	0	0	0	0
	OG0006041	XP_011393922.1	hypothetical protein NCU06467	-	U9WGF9	AMP-activated protein kinase glycogen-binding domain-containing protein	na	N. crassa					225	53.81	A0A2S7PFW6	Anaphase-promoting complex subunit 4 protein	na	Rutstroemia sp. NJR-2017a BBW	53	48.34	A0A261XUA9	AMP-activated protein kinase glycogen-binding domain-containing protein	GO:0005737 GO:0016020 GO:0031588 GO:0005634 GO:0019901 GO:0007165	Bifiguratus adelaidae	70	0	0	0	0	0	0	0		0	0	0	0	0
	OG0005991	XP_958816.3	hypothetical protein NCU06008	-	Q7S2E9	Uncharacterized protein	na	N. crassa					49	70.38	A0A166UDZ8	Endo-1,3-beta glucanase	GO:0016020	Colletotrichum tofieldiae	37	70.69	S3CPN2	Endo-1 3(4)-beta glucanase	GO:0016020	Ophiostoma piceae	70	0	0	0	0	0	0	0		0	0	0	0	0
	OG0005525	XP_011393754.1	hypothetical protein NCU00124	PAT1; Topoisomerase II-associated protein PAT1;pfam09770, gal11_coact; gall11 coactivator domain; cl17096, PHA03378; EBNA-3B; Provisional	U9W4U5	Mediator complex subunit 15 KIX domain-containing protein	GO:0035097 GO:0005667 GO:0030374 GO:0045944	N. crassa																	70	0	0	0	0	0	0	0		0	0	0	0	0
	OG0005503	XP_961511.1	hypothetical protein NCU03735	MARVEL; Membrane-associating domain; pfam01284	Q1K7X4	MARVEL domain-containing protein	GO:0016020	N. crassa																	70	0	0	0	0	0	0	0		0	0	0	0	0
	OG0005013	XP_001728323.1	hypothetical protein NCU10457	-	A7UWE2	Uncharacterized protein	na	N. crassa					5	63.97	A0A0J8QK30	Solute carrier family 25 member 39	GO:0005743 GO:1990542	Coccidioides immitis	23	58.97	A0A5A7PZC9	F1-ATP synthase delta subunit	GO:0009535 GO:0000274 GO:0005886 GO:0045261 GO:0046933 GO:0009773 GO:0009772 GO:0042776	Striga asiatica	70	0	0	0	0	0	0	0		0	0	0	0	0
	OG0006217	XP_964175.1	hypothetical protein NCU03082	-	Q7SDS8	Signal peptide-containing protein	na	N. crassa					171	57.91	A0A0P7AU84	Signal peptide-containing protein	na	Neonectria ditissima	24	45	A0A6I9UX11	Probable serine/threonine-protein kinase dyrk2	GO:0016301 GO:0016310	Bactrocera dorsalis	69	0	0	0	0	0	0	0		0	0	0	0	0
	OG0006117	XP_963857.1	hypothetical protein NCU02120	pilus_FilE; putative pilus assembly protein FilE; NF033645	Q7SCY4	Uncharacterized protein	GO:0005634	N. crassa																	69	0	0	0	0	0	0	0		0	0	0	0	0
	OG0006203	XP_959495.1	hypothetical protein NCU02236	RNA_polI_A34; DNA-directed RNA polymerase I subunit RPA34.5;pfam08208	Q7S443	Uncharacterized protein	GO:0006360	N. crassa																	69	0	0	0	0	0	0	0		0	0	0	0	0
	OG0006120	XP_963949.1	hypothetical protein NCU09307	PHA03247; large tegument protein UL36; Provisional	Q7SD86	Glycoprotease family protein	GO:0016020	N. crassa																	69	0	0	0	0	0	0	0		0	0	0	0	0
	OG0005869	XP_964687.1	hypothetical protein NCU09252	C2H2 Zn finger; C2H2 Zn finger [structural motif], Med15; ARC105 or Med15 subunit of Mediator complex non-fungal; pfam09606, ;	Q7SF58	C2H2-type domain-containing protein	na	N. crassa					130	50.38	C0NFW2	C2H2-type domain-containing protein	na	Ajellomyces capsulatus	49	51.03	A0A1Q9C3M7	Gypsy retrotransposon integrase-like protein 1	GO:0003676 GO:0015074	Symbiodinium microadriaticum	69	0	0	0	0	0	0	0		0	0	0	0	0
	OG0005837	XP_011394259.1	hypothetical protein NCU07692	-	V5IMD3	Zn(2)-C6 fungal-type domain-containing protein	na	N. crassa					521	71.81	A0A364LVR1	Zn(II)2Cys6 transcription factor	GO:0005634 GO:0003677 GO:0000981 GO:0008270	Aspergillus flavus	70	72.5	A0A1S9RYZ2	Zn(II)2Cys6 transcription factor	GO:0005634 GO:0000981 GO:0008270	Penicillium brasilianum	69	0	0	0	0	0	0	0		0	0	0	0	0
	OG0005805	XP_008598089.1	methyltransferase domain-containing protein		J4UMV6	Methyltransferase domain-containing protein	GO:0008168 GO:0032259	B. bassiana																	69	0	0	0	0	0	0	0		0	0	0	0	0
	OG0006234	XP_960421.1	hypothetical protein NCU04795	TCO89; TORC1 subunit TCO89; pfam10452	Q7S6P0	TORC1 subunit TCO89	GO:0000329 GO:0031931 GO:0031929	N. crassa																	69	0	0	0	0	0	0	0		0	0	0	0	0
	OG0006232	XP_958052.1	hypothetical protein NCU09527	MARVEL; Membrane-associating domain; pfam01284, PHA03269; envelope glycoprotein C; Provisional, ;	Q7S0I2	MARVEL domain-containing protein	GO:0016020	N. crassa																	69	0	0	0	0	0	0	0		0	0	0	0	0
	OG0006231	XP_962784.2	hypothetical protein NCU07657	Hsm3_like; Hsm3 is a yeast Proteasome chaperone of the 19S regulatory particle and related proteins; cl40605	Q7SAX5	DNA mismatch repair protein HSM3 N-terminal domain-containing protein	na	N. crassa					6	84.69	G4UKL2	DNA mismatch repair protein HSM3 N-terminal domain-containing protein	na	Neurospora tetrasperma	4	85.29	U7Q387	DNA mismatch repair protein HSM3 N-terminal domain-containing protein	na	Sporothrix schenckii	69	0	0	0	0	0	0	0		0	0	0	0	0
	OG0006223	XP_011394638.1	hypothetical protein NCU04224	FYVE_like_SF; FYVE domain like superfamily; cd00065	V5ILP0	F-box domain-containing protein	na	N. crassa					233	69.81	A0A179F929	Sulfate transporter protein	na	Pochonia chlamydosporia	43	67.62	A0A1W5DEA6	Zinc finger, RING/FYVE/PHD-type	na	Lasallia pustulata	69	0	0	0	0	0	0	0		0	0	0	0	0
	OG0006218	XP_958644.2	hypothetical protein NCU09877	-	Q7S237	Uncharacterized protein	na	N. crassa					242	74.75	E3QS08	Uncharacterized protein	GO:0016020	Colletotrichum graminicola	98	73.62	A0A4Z1NQ17	RNA cytidine acetyltransferase	GO:0016020 GO:0016740	Venturia nashicola	69	0	0	0	0	0	0	0		0	0	0	0	0
	OG0006216	XP_963216.1	AP-3 complex subunit sigma	longin-like; Longin-like domains; cl38905	Q7SC18	AP complex subunit sigma	GO:0043231 GO:0016020 GO:0006886 GO:0016192	N. crassa																	69	0	0	0	0	0	0	0		0	0	0	0	0
	OG0006212	XP_011394923.1	hypothetical protein NCU04808	-	V5IN18	Uncharacterized protein	GO:0016020	N. crassa																	69	0	0	0	0	0	0	0		0	0	0	0	0
	OG0006209	XP_963295.2	hypothetical protein NCU08452	PTZ00108; DNA topoisomerase 2-like protein; Provisional, PLN03188; kinesin-12 family protein; Provisional, ;	Q7SC58	Uncharacterized protein	na	N. crassa					12	41.38	F8MP11	AGC-kinase C-terminal domain-containing protein	na	Neurospora tetrasperma	5	48.44	A0A0G4L7J3	SANT domain-containing protein	GO:0034967 GO:0003714 GO:0000122	Verticillium longisporum	69	0	0	0	0	0	0	0		0	0	0	0	0
	OG0006207	XP_957342.2	hypothetical protein NCU06451	-	Q7RYW7	Small ribosomal subunit protein mS27	GO:0005739	N. crassa																	69	0	0	0	0	0	0	0		0	0	0	0	0
	OG0006204	XP_959892.1	hypothetical protein NCU02248	-	Q7S5B6	Prefoldin subunit	na	N. crassa					137	70.56	A0A447CEJ8	Cytosine-specific methyltransferase	GO:0008168 GO:0032259	Podospora comata	88	76.06	A0A1W0AAA1	Phosphatase 2	GO:0005737 GO:0000159 GO:0019888	Thraustotheca clavata	69	0	0	0	0	0	0	0		0	0	0	0	0
	OG0006182	XP_962676.1	hypothetical protein NCU08006	-	Q7SAN5	Uncharacterized protein	GO:0016020	N. crassa																	69	0	0	0	0	0	0	0		0	0	0	0	0
	OG0006166	XP_964181.1	hypothetical protein NCU03132	-	Q7SDV8	Acetylserotonin methytransferase-like protein	GO:0016020	N. crassa																	69	0	0	0	0	0	0	0		0	0	0	0	0
	OG0006161	XP_963940.1	hypothetical protein NCU02784	UBA_HYPK; UBA-like domain found in Huntingtin-interacting protein K (HYPK) and similar proteins; cd14361	Q7SD78	Nascent polypeptide-associated complex subunit alpha-like UBA domain-containing protein	GO:0043066 GO:0050821	N. crassa																	69	0	0	0	0	0	0	0		0	0	0	1	0
	OG0006158	XP_956195.1	hypothetical protein NCU00142	-	Q7RWV1	CRIB domain-containing protein	na	N. crassa					56	49.81	A0A1S3L1D5	MAP7 domain-containing protein 2-like isoform X3	GO:0015630 GO:0000226	Salmo salar	42	48.78	A0A7J5X610	FERM domain-containing protein	GO:0005856 GO:0016020	Dissostichus mawsoni	69	0	0	0	0	0	0	0		0	0	0	0	0
	OG0006154	XP_963099.1	hypothetical protein NCU06248	Iwr1; Transcription factor Iwr1; pfam08574	Q7SBQ9	Transcription factor Iwr1 domain-containing protein	GO:0005737 GO:0006606	N. crassa																	69	0	0	0	0	0	0	0		0	0	0	0	0
	OG0006105	XP_008596808.1	GMP synthase	AIM3; Altered inheritance of mitochondria protein 3; pfam17096	J4KPM4	GMP synthase	na	B. bassiana					168	62.47	E5A776	GMP synthase	GO:0030479 GO:0045121 GO:0051016	Leptosphaeria maculans	52	62.28	A0A0F4Z484	Glyceraldehyde 3-phosphate dehydrogenase	GO:0004365	Rasamsonia emersonii	69	0	0	0	0	0	0	0		0	0	0	0	0
	OG0006103	XP_959448.1	hypothetical protein NCU08141	-	Q7S3Y9	Only prolin and serin are matching in the corresponding protein	na	N. crassa					103	52.38	E3R0K7	Only prolin and serin are matching in the corresponding protein	na	Colletotrichum graminicola	14	53	A0A5N5PZR1	Only prolin and serin are matching in the corresponding protein	na	Coniochaeta sp. 2T2.1	69	0	0	0	0	0	0	0		0	0	0	0	0
	OG0006053	XP_965539.1	hypothetical protein NCU01908	PHA03247; large tegument protein UL36; Provisional	Q7SH98	Uncharacterized protein	na	N. crassa					30	37.88	A0A2R5LJY7	Putative eukaryotic translation initiation factor 3 subunit 10	GO:0003743	Ornithodoros turicata	14	58.94	L8HK44	phospholipase D	GO:0043231 GO:0098590 GO:0070290 GO:0004630 GO:0009395 GO:0060627	Acanthamoeba castellanii	69	0	0	0	0	0	0	0		0	0	0	0	0
	OG0006047	XP_956084.3	hypothetical protein NCU04088	Herpes_BLLF1; Herpes virus major outer envelope glycoprotein (BLLF1); pfam05109	Q7RWM1	Uncharacterized protein	na	N. crassa					104	60.84	M9LY51	dolichyl-P-Glc:Man9GlcNAc2-PP-dolichol alpha-1,3-glucosyltransferase	GO:0005789 GO:0042281 GO:0006487	Pseudozyma antarctica	113	69	A0A0W0EX71	Phenylalanine ammonia-lyase	GO:0005737 GO:0045548 GO:0006559	Moniliophthora roreri	69	0	0	0	0	0	0	0		0	0	0	0	0
	OG0005876	XP_008601802.1	uncharacterized protein BBA_08483	-	J4UHD6	DUF3824 domain-containing protein	na	B. bassiana					136	45	G0RUT6	DUF3824 domain-containing protein	na	Hypocrea jecorina	54	45.22	A0A2H2Z4M5	Mollulscan rhodopsin C-terminal tail	na	Trichoderma parareesei	69	0	0	0	0	0	0	0		0	0	0	0	0
	OG0005714	XP_958881.1	hypothetical protein NCU07388	-	Q7S2H4	Mid2 domain-containing protein	GO:0016020	N. crassa																	69	0	0	0	0	0	0	0		0	0	0	0	0
	OG0005648	XP_958292.1	hypothetical protein NCU09335	-	Q7S132	Key lime pathogenicity protein	na	N. crassa					33	53.75	A0A068Y623	Cyclin dependent kinase 17	GO:0005737 GO:0005634 GO:0005524 GO:0004693 GO:0016310	Echinococcus multilocularis	29	60.19	A0A4T0JJV4	CWF19-like protein 2	GO:0071014 GO:0000398	Wallemia ichthyophaga	69	0	0	0	0	0	0	0		0	0	0	0	0
	OG0004006	XP_964798.1	hypothetical protein NCU00882	SRR1; pfam07985	Q7SFE9	SRR1-like domain-containing protein	na	N. crassa					79	92.5	A0A6I3WXW8	Class I SAM-dependent methyltransferase	GO:0008168 GO:0032259	Actinomycetes bacterium	46	93.5	A0A2W7S426	Methyltransferase family protein	GO:0008168 GO:0032259	Algoriphagus ratkowskyi	69	0	0	0	0	0	0	0		0	0	0	0	0
	OG0006000	XP_965767.1	hypothetical protein NCU00627	-	Q7SI25	Uncharacterized protein	na	N. crassa					200	68.94	A0A420JB14	Hydroxyacyl-thioester dehydratase type 2, mitochondrial	GO:0005739 GO:0019171	Golovinomyces cichoracearum	54	80.62	A0A444RY07	MaoC-like domain-containing protein	GO:0005777 GO:0044594 GO:0003857 GO:0004300 GO:0006635	Verticillium dahliae	68	0	0	0	0	0	0	0		0	0	0	0	0
	OG0006263	XP_961393.2	hypothetical protein NCU01307	-	Q1K7V9	Uncharacterized protein	na	N. crassa					5	64.88	B0D8X4	Predicted protein	GO:0016020	Laccaria bicolor	27	65.88	A0A4P9WAE2	Acyltransferase 3 domain-containing protein	GO:0016747	Blyttiomyces helicus	68	0	0	0	0	0	0	0		0	0	0	0	0
	OG0006262	XP_964647.1	hypothetical protein NCU02025	-	Q1K924	Nup53p-like protein	na	N. crassa					492	77.5	A0A418EJI1	RRM domain-containing protein	GO:0005730 GO:0003729	Aphanomyces astaci	57	67.64	G0S156	Nucleoporin NUP53	GO:0031965 GO:0005643 GO:0051028 GO:0015031	Chaetomium thermophilum	68	0	0	0	0	0	0	0		0	0	0	0	0
	OG0006258	XP_956382.1	hypothetical protein NCU00072	-	Q7RX78	Uncharacterized protein	GO:0016020	N. crassa																	68	0	0	0	0	0	0	0		0	0	0	0	0
	OG0006236	XP_956132.1	hypothetical protein NCU03569	-	Q1K4V5	Uncharacterized protein	na	N. crassa					117		na		na		36		na		na		68	0	0	0	0	0	0	0		0	0	0	0	0
	OG0006229	XP_962667.2	hypothetical protein NCU07997	-	Q7SAP3	Uncharacterized protein	na	N. crassa					130	79.31	A0A179HYN9	Zinc finger domain-containing protein	na	Purpureocillium lilacinum	23	79.94	A0A086TH32	FYVE-type domain-containing protein	na	Hapsidospora chrysogenum	68	0	0	0	0	0	0	0		0	0	0	0	0
	OG0006228	XP_965086.1	hypothetical protein NCU02492	-	Q7SG72	Uncharacterized protein	na	N. crassa					231	64.19	A0A3M7MI34	Rubredoxin-type fold	na	Pyrenophora seminiperda	36		na		na		68	0	0	0	0	0	0	0		0	0	0	0	0
	OG0006227	XP_958896.2	hypothetical protein NCU09124	-	Q7S2M4	Uncharacterized protein	na	N. crassa					16	58.62	A0A090KYX5	Globin, structural domain-containing protein	na	Strongyloides ratti	13	51.75	J3NKL8	pH-response transcription factor pacC/RIM101	GO:0005634 GO:0045944	Gaeumannomyces tritici	68	0	0	0	0	0	0	0		0	0	0	0	0
	OG0006179	XP_960489.2	hypothetical protein NCU05527	-	Q7S6R3	Uncharacterized protein	GO:0005634 GO:0003723	N. crassa																	68	0	0	0	0	0	0	0		0	0	0	0	0
	OG0006108	XP_957633.1	hypothetical protein NCU04018	-	Q1K611	C2H2-type domain-containing protein	na	N. crassa					248	60.44	A0A4Y9YFD5	RING-type domain-containing protein	GO:0016020 GO:0046872 GO:0061630 GO:0006511	Dentipellis fragilis	111	67.38	A0A197KG61	PX domain-containing protein	GO:0010008 GO:0035091 GO:0034498 GO:0045053	Linnemannia elongata	68	0	0	0	0	0	0	0		0	0	0	0	0
	OG0006094	XP_955937.1	hypothetical protein NCU05010	PHA03247; large tegument protein UL36; Provisional, Herpes_BLLF1; Herpes virus major outer envelope glycoprotein (BLLF1); pfam05109, ;	Q7RWC8	Uncharacterized protein	na	N. crassa					20	62.88	A0A5C3ETS2	Arrestin-like N-terminal domain-containing protein	na	Pseudozyma flocculosa	14	62.78	A0A317Y0B8	Uncharacterized protein	GO:0009976	Testicularia cyperi	68	0	0	0	0	0	0	0		0	0	0	0	0
	OG0005950	XP_964040.1	hypothetical protein NCU03035	-	Q7SDH3	Uncharacterized protein	na	N. crassa					8		na		na		1		na		na		68	0	0	0	0	0	0	0		0	0	0	0	0
	OG0005718	XP_964523.1	hypothetical protein NCU02164	-	Q7SEQ3	Uncharacterized protein	GO:0016020	N. crassa																	68	0	0	0	0	0	0	0		0	0	0	0	0
	OG0005653	XP_964764.1	hypothetical protein NCU00938	-	Q7SFA9	Uncharacterized protein	GO:0016020	N. crassa																	68	0	0	0	0	0	0	0		0	0	0	0	0
	OG0005608	XP_962037.2	hypothetical protein NCU08826	PTZ00449; 104 kDa microneme/rhoptry antigen; Provisional, PRK10263; DNA translocase FtsK; Provisional, ECM11; Extracellular mutant protein 11; pfam15463	Q7S8Y9	Extracellular mutant protein 11 C-terminal domain-containing protein	GO:0070860 GO:0001164 GO:0017025 GO:0042790	N. crassa																	68	0	0	0	0	0	0	0		0	0	0	0	0
	OG0004769	XP_965237.1	hypothetical protein NCU08334	PRK12678; transcription termination factor Rho; Provisional, PTZ00121; MAEBL; Provisional, ;	Q7SGS8	Zinc finger protein dhhc domain containing protein	na	N. crassa					107	42.75	A0A663MHF4	Zinc finger protein 644	GO:0005634 GO:0000981 GO:0046872 GO:0000978	Athene cunicularia	47	57.19	A0A2N9EMY2	RNase H type-1 domain-containing protein	GO:0003676 GO:0004523	Fagus sylvatica	68	0	0	0	0	0	0	0		0	0	0	0	0
	OG0006307	XP_964423.2	hypothetical protein NCU03270	-	Q7SEF8	Basic proline-rich protein	na	N. crassa					6	53.53	F8N331	Basic proline-rich protein	na	Neurospora tetrasperma	1	53.47	G4U6K5	Basic proline-rich protein	na	Neurospora tetrasperma	67	0	0	0	0	0	0	0		0	0	0	0	0
	OG0006257	XP_008602473	HET-s/LopB domain-containing protein	Prion-inhibition and propagation; pfam14479	J4UGE3	HET-s/LopB domain-containing protein	na	B. bassiana					329	68.12	A0A3E2HDW4	Protein kinase domain-containing protein	GO:0005524 GO:0004672	Scytalidium lignicola	60	79.38	A0A074VLF1	phosphoserine transaminase	GO:0004648 GO:0030170 GO:0006564	Aureobasidium melanogenum	67	0	0	0	0	0	0	0		0	0	0	0	0
	OG0005948	XP_957554.2	hypothetical protein NCU03915	PHA03247; large tegument protein UL36; Provisional	Q1K5Z6	Glucan 1, 4-alpha-glucosidase	na	N. crassa					156	57.56	A0A0A2W105	Glycoprotease family protein	GO:0016020	Beauveria bassiana	50	57.81	A0A369GS63	Glycoprotease family protein	GO:0016020	Ophiocordyceps camponoti-leonardi	67	0	0	0	0	0	0	0		0	0	0	0	0
	OG0005918	XP_961105.2	hypothetical protein NCU03758	PTZ00449; 104 kDa microneme/rhoptry antigen; Provisional	Q1K7B6	Ser/arg-related nuclear matrix protein	na	N. crassa					173	64.06	A0A7T6XN91	Protein related to ser/arg-related nuclear matrix protein	na	Penicillium digitatum	52	63	A1CB95	Ser/arg-related nuclear matrix protein	na	Aspergillus clavatus	67	0	0	0	0	0	0	0		0	0	0	0	0
	OG0005501	XP_958912.1	hypothetical protein NCU09140	PHA03247; large tegument protein UL36; Provisional	Q7S2K9	C3H1-type domain-containing protein	GO:0046872	N. crassa																	67	0	0	0	0	0	0	0		0	0	0	0	0
	OG0006313	XP_956754.2	hypothetical protein NCU01477	-	Q7RXV4	Uncharacterized protein	GO:0016020	N. crassa																	67	0	0	0	0	0	0	0		0	0	0	0	0
	OG0006309	XP_964914.3	hypothetical protein NCU09097	-	Q7SFQ3	Helicase-like protein	na	N. crassa					246	74.94	A0A166MJN7	Helicase-like protein	GO:0004386	Colletotrichum tofieldiae	33	74.38	A0A0B4GPJ3	Helicase-like protein	GO:0004386	Metarhizium anisopliae	67	0	0	0	0	0	0	0		0	0	0	0	0
	OG0006302	XP_011393791.1	hypothetical protein NCU00222	PTZ00108; DNA topoisomerase 2-like protein; Provisional, PRK13914; invasion associated endopeptidase	U9W362	Erythromycin esterase	na	N. crassa					38	51.22	A0A553MVP6	SERRATE/Ars2 N-terminal domain-containing protein	GO:0016604 GO:0006397 GO:0031053	Danionella translucida	21	50.88	A0A3N4LRL4	BZIP domain-containing protein	GO:0090575 GO:0001228 GO:0000976	Terfezia boudieri	67	0	0	0	0	0	0	0		0	0	0	0	0
	OG0006301	XP_956162.1	hypothetical protein NCU00051	-	Q7RWS1	Uncharacterized protein	GO:0016020	N. crassa																	67	0	0	0	0	0	0	0		0	0	0	0	0
	OG0006299	XP_957265.1	hypothetical protein NCU00379	-	Q7RYT0	Guanine nucleotide-exchange factor SEC12	GO:0005789 GO:0000139 GO:0005096 GO:0005085 GO:0006888 GO:0009306 GO:0003400	N. crassa																	67	0	0	0	0	0	0	0		0	0	0	0	0
	OG0006271	XP_958424.3	hypothetical protein NCU07423	-	Q7S1F1	Uncharacterized protein	na	N. crassa					4		na		na		1		na		na		67	0	0	0	0	0	0	0		0	0	0	0	0
	OG0006260	XP_959035.1	hypothetical protein NCU09007	PHA03378; EBNA-3B; Provisional, PHA03247; large tegument protein UL36; Provisional, ; DNA polymerase III subunits gamma and tau; Provisional	Q7S2W3	Uncharacterized protein	GO:0005884 GO:0030041	N. crassa							na										67	0	0	0	0	0	0	0		0	0	0	0	0
	OG0006235	XP_963631.1	hypothetical protein NCU06790	-	Q1K8Y4	Peptidyl-tRNA hydrolase	GO:0016020	N. crassa							na										67	0	0	0	0	0	0	0		0	0	0	0	0
	OG0006233	XP_011394192.1	hypothetical protein NCU06536	-	V5IPW6	Serine-threonine rich protein	na	N. crassa					115	52.12	M7TLM7	Putative serine-threonine rich protein		Botryotinia fuckeliana	42	38.19	A0A6A2WB88	Galactose-binding protein isoform 1	GO:0005737 GO:0016020 GO:0043621 GO:0034975 GO:0046850	Hibiscus syriacus	67	0	0	0	0	0	0	0		0	0	0	0	0
	OG0006219	XP_964755.2	hypothetical protein NCU00929	-	Q7SFB8	Uncharacterized protein	GO:0016020	N. crassa																	67	0	0	0	0	0	0	0		0	0	0	0	0
	OG0006112	XP_962137.2	hypothetical protein NCU07283	-	Q7S984	Uncharacterized protein	na	N. crassa					71	56.31	A0A447BZJ4	Period circadian protein	na	Podospora comata	18	59.91	G2QWM9	Dehydrin-like protein	na	Thermothielavioides terrestris	67	0	0	0	0	0	0	0		0	0	0	0	0
	OG0005059	XP_965522.2	hypothetical protein NCU01891	-	Q7SHB5	MARVEL domain-containing protein	GO:0016020	N. crassa																	67	0	0	0	0	0	0	0		0	0	0	0	0
	OG0004881	XP_959210.1	hypothetical protein NCU04667	-	Q1K6F6	Cell surface protein	na	N. crassa					71	56.31	A0A447BZJ4	Period circadian protein	na	Podospora comata	18	59.91	G2QWM9	Dehydrin-like protein	na	Thermothielavioides terrestris	67	0	0	0	0	0	0	0		0	0	0	0	0
	OG0006368	XP_003721339.1	uncharacterized protein MGG_09002	Fungal Zn(2)-Cys(6) binuclear cluster domain	G4NKG0	Zn(2)-C6 fungal-type domain-containing protein	GO:0005634 GO:0000981 GO:0008270	P. oryzae																	66	0	0	0	0	0	0	0		0	0	0	0	0
	OG0006355	XP_960583.1	GPI anchored protein	-	Q7S732	GPI anchored protein	na	N. crassa					155	60.75	A0A168DKI1	GPI anchored protein	GO:0016020	Akanthomyces lecanii	52	51.03	V5FG77	GPI anchored protein	GO:0016020	Byssochlamys spectabilis	66	0	0	0	0	0	0	0		0	0	0	0	0
	OG0006351	XP_008596760.1	pathway-specific nitrogen regulator	MSCRAMM family adhesin clumping factor ClfA;NF033609	J5K018	Pathway-specific nitrogen regulator	na	B. bassiana					78	56.81	A0A6S6VZX6	TolA	na	Pyrenophora teres f. teres	42	58.43	A0A1C1CM40	Flavoprotein oxygenase	na	Cladophialophora carrionii	66	0	0	0	0	0	0	0		0	0	0	0	0
	OG0006268	XP_008601277.1	SWIM zinc finger protein	-	J5JAD3	SWIM zinc finger protein	GO:0008270	B. bassiana																	66	0	0	0	0	0	0	0		0	0	0	0	0
	OG0006356	XP_964247.1	hypothetical protein NCU02177	-	Q7SE06	Altered inheritance of mitochondria protein 11	GO:0016020 GO:0005739	N. crassa																	66	0	0	0	0	0	0	0		0	0	0	0	0
	OG0006350	XP_957679.2	hypothetical protein NCU04064	-	Q7RZF4	Alpha/beta-hydrolase	GO:0016020	N. crassa																	66	0	0	0	0	0	0	0		0	0	0	0	0
	OG0006347	XP_959760.1	hypothetical protein NCU02334	-	Q7S4T1	MARVEL domain-containing protein	GO:0016020	N. crassa																	66	0	0	0	0	0	0	0		0	0	0	0	0
	OG0006344	XP_957001.3	hypothetical protein NCU00014	-	Q7RY91	Uncharacterized protein	na	N. crassa					161	62.53	A0A1W2TLZ9	Putative cobalt-precorrin-5B C-methyltransferase	GO:0008168 GO:0032259	Rosellinia necatrix	23	72.88	A0A2S7PMU3	C Chain C Chaetomium Theromophilum Trex2 Cid Domain Complex protein	na	Rutstroemia sp. NJR-2017a BBW	66	0	0	0	0	0	0	0		0	0	0	0	0
	OG0006317	XP_960541.1	hypothetical protein NCU05579	PHA03247; large tegument protein UL36; Provisional	Q7S6Y4	BTB domain-containing protein	na	N. crassa					89	65.94	A0A1M3TIJ2	BTB domain-containing protein	na	Aspergillus luchuensis	45	63.84	A0A0C3L696	HTH La-type RNA-binding domain-containing protein	GO:0005634 GO:0003729 GO:0008033	Tulasnella calospora	66	0	0	0	0	0	0	0		0	0	0	0	0
	OG0006300	XP_959054.2	hypothetical protein NCU07541	SUR7; SUR7/PalI family; cl24030	Q7S307	Uncharacterized protein	GO:0016020	N. crassa																	66	0	0	0	0	0	0	0		0	0	0	0	0
	OG0006224	XP_960794.1	hypothetical protein NCU08972	-	Q7S7E2	Uncharacterized protein	na	N. crassa					540	94.81	W9PQQ3	Lysozyme inhibitor LprI N-terminal domain-containing protein	na	Fusarium oxysporum f. sp. pisi	45	94.62	X0A4Q0	Lysozyme inhibitor LprI N-terminal domain-containing protein	na	Fusarium oxysporum f. sp. melonis	66	0	0	0	0	0	0	0		0	0	0	0	0
	OG0005768	XP_961611.2	hypothetical protein NCU00999	-	Q7S823	Ilp is an apoptosis inhibitor	na	N. crassa					205	75.19	A0A254TUH1	Amino acid adenylation domain protein	na	Aspergillus niger	24	80.38	A0A6A6PL58	Alpha-ketoglutarate-dependent dioxygenase AlkB-like domain-containing protein	na	Neohortaea acidophila	66	0	0	0	0	0	0	0		0	0	0	0	0
	OG0000791	XP_001727969.2	hypothetical protein NCU10538	Clr5; Clr5 domain; pfam14420	A7UXG9	Clr5 domain-containing protein	na	N. crassa					5	65.88	G4UXR7	Clr5 domain-containing protein	na	Neurospora tetrasperma	4	48.91	A0A2A9PHK9	Zn(2)-C6 fungal-type domain-containing protein	GO:0005634 GO:0003677 GO:0000981 GO:0008270	Ophiocordyceps unilateralis	65	0	0	0	0	0	0	0		0	0	0	0	0
	OG0006398	XP_961094.2	hypothetical protein NCU03747	-	Q1K7C4	Uncharacterized protein	na	N. crassa					3		na		na		1		na		na		65	0	0	0	0	0	0	0		0	0	0	0	0
	OG0006397	XP_963117.2	hypothetical protein NCU07856	-	Q7SBV2	Uncharacterized protein	na	N. crassa					172	81.19	H1W349	Ribosomal protein L34e	GO:0005840	Colletotrichum higginsianum	29		na		na		65	0	0	0	0	0	0	0		0	0	0	0	0
	OG0006395	XP_956443.1	hypothetical protein NCU03334	-	Q1K533	Uncharacterized protein	GO:0016020	N. crassa							na										65	0	0	0	0	0	0	0		0	0	0	0	0
	OG0006390	XP_961755.1	hypothetical protein NCU08695	-	Q7S855	Uncharacterized protein	na	N. crassa					33	57.31	A0A179HZK4	FAD dependent oxidoreductase	na	Purpureocillium lilacinum	7	57.59	A0A151GQP2	FAD dependent oxidoreductase	na	Drechmeria coniospora	65	0	0	0	0	0	0	0		0	0	0	0	0
	OG0006386	XP_956168.3	hypothetical protein NCU00483	zf-CCHC; Zinc knuckle; pfam00098	Q7RWU4	CCHC-type domain-containing protein	GO:0003676 GO:0008270	N. crassa																	65	0	0	0	0	0	0	0		0	0	0	0	0
	OG0006363	XP_956958.2	hypothetical protein NCU01509	-	F5HD64	Glucan 1, 4-alpha-glucosidase	na	N. crassa					11	46.91	F8MPL4	Glucan 1, 4-alpha-glucosidase	na	Neurospora tetrasperma	16	62.88	A0A3B9YDC1	GYF domain-containing protein	GO:0016020	Elusimicrobiota bacterium	65	0	0	0	0	0	0	0		0	0	0	0	0
	OG0006272	XP_964531.2	hypothetical protein NCU02172	-	Q7SEP5	Proteophosphoglycan ppg4	na	N. crassa					7		na		na		4		na		na		65	0	0	0	0	0	0	0		0	0	0	0	0
	OG0006167	XP_965624.1	hypothetical protein NCU02942	-	Q7SHG2	F-box domain-containing protein	na	N. crassa					267	79.19	A0A254UJB6	Nuclear distribution protein nudF	na	Aspergillus niger	26	78.19	A0A1J9SJ87	Twin-arginine translocation pathway signal sequence	na	Diplodia corticola	65	0	0	0	0	0	0	0		0	0	0	0	0
	OG0002757	XP_957685.2	hypothetical protein NCU04070	-	Q7RZE8	Mid2 domain-containing protein	GO:0016020	N. crassa							na										65	0	0	0	0	0	0	0		0	0	0	0	0
	OG0001541	EAA27988.3	hypothetical protein NCU00100		Q7RYM8	Homeobox domain-containing protein	GO:0005634 GO:0004197 GO:0003677 GO:0006508	N. crassa																	72	2	0	2	0	0	0	0		0	0	0	0	0
	OG0005917	CCU82012.1	hypothetical protein BGHDH14_bgh04570		N1JIE5	Uncharacterized protein	na	B. hordei					63	59.59	A0A444XCP6	Protein CHUP1	GO:0055028 GO:0072699	Arachis hypogaea	90	73.56	A0A5N5QJS9	Autophagy-related protein 17	GO:1990316 GO:0034045 GO:0060090 GO:0030295 GO:0000422 GO:0034727	Ceratobasidium theobromae	72	2	0	0	0	0	0	0		0	0	0	0	0
	OG0005902	KHJ34130.1	putative s-adenosylmethionine-dependent methyltransferase-like protein		A0A0B1P9W3	Putative s-adenosylmethionine-dependent methyltransferase-like protein	GO:0008168 GO:0032259	U. necator																	71	2	0	1	0	0	0	0		0	0	0	0	0
	OG0005871	SLM39577.1	Six-hairpin glycosidase-like		A0A1W5D8V9	Six-hairpin glycosidase-like	GO:0016798 GO:0005975	L. pustulata																	72	0	0	2	0	0	0	0		0	0	0	0	0
	OG0005304	CCU79511.1	C2H2 finger domain-containing protein		N1JC61	C2H2 finger domain-containing protein	GO:0008270	B. hordei																	72	0	0	2	0	0	0	0		0	0	0	0	0
	OG0000623	EAA32842.2	hypothetical protein NCU05307		Q7S8Z3	Rhodopsin domain-containing protein	GO:0016020	N. crassa																	72	0	0	2	0	0	0	0		0	0	0	0	0
	OG0005990	XP_752715.1	cell wall proline rich protein, putative		Q4WSA5	Cell wall proline rich protein, putative	na	A. fumigatus					19	41.25	A1CPB3	Cell wall proline rich protein, putative	na	Aspergillus clavatus	24	42.5	S7ZZQ6	CCHC-type domain-containing protein	GO:0003676 GO:0008270	Dactylellina haptotyla	72	1	0	0	0	0	0	0		0	0	0	0	0
	OG0005955	XP_003720767.1	uncharacterized protein MGG_02941		G4NLE0	GAT domain-containing protein	GO:0035091 GO:0043130 GO:0016197 GO:0006886 GO:0007034	P. oryzae																	71	2	0	0	0	0	0	0		0	0	0	0	0
	OG0004906	KHJ33703.1	putative sialidase protein		A0A0B1P609	Putative sialidase protein	na	U. necator					133	62	T5AJT7	Sialidase	na	Ophiocordyceps sinensis	16	74.81	A0A0G2EWY7	Putative sialidase	na	Phaeomoniella chlamydospora	71	0	0	2	0	0	0	0		0	0	0	0	0
	OG0004512	XP_003711385.1	uncharacterized protein MGG_07479		G4N199	Ubiquitin-like domain-containing protein	GO:0072686 GO:0005876 GO:0008574 GO:0090307 GO:0051231	P. oryzae																	71	1	0	1	0	0	0	0		0	0	0	0	0
	OG0006070	XP_746609.1	uncharacterized protein AFUA_4G04230		Q4W9P2	Uncharacterized protein	GO:0016020	A. fumigatus																	70	2	0	0	0	0	0	0		0	0	0	0	0
	OG0005998	XP_752657.2	conserved uncharacterized protein AFUA_1G12870		Q4WSG3	Uncharacterized protein	GO:0016020	A. fumigatus																	70	2	0	0	0	0	0	0		0	0	0	0	0
	OG0005946	XP_011393018.1	uncharacterized protein NCU02745		V5IPM7	Mid2 domain-containing protein	GO:0016020	N. crassa																	71	0	0	1	0	0	0	0		0	0	0	0	0
	OG0005287	XP_755141.1	involucrin repeat protein		Q4X212	Leashin	GO:0000934 GO:0009611	A. fumigatus																	70	0	0	2	0	0	0	0		1	0	0	0	0
	OG0006118	KIW12946.1	hypothetical protein PV08_08133		A0A0D1YDB3	SUZ-C domain-containing protein	na	E. spinifera					35	61.25	A0A6A6YXG9	SUZ domain-containing protein	na	Mytilinidion resinicola	7	63.19	A0A2T2P6R2	SUZ domain-containing protein	na	Corynespora cassiicola	70	1	0	0	0	0	0	0		0	0	0	0	0
	OG0006116	XP_960689.1	hypothetical protein NCU01421		Q1K6L9	DNA replication factor Cdt1 C-terminal domain-containing protein	na	N. crassa					407	59.12	C1GM72	DNA replication factor Cdt1 C-terminal domain-containing protein	na	Paracoccidioides brasiliensis	93	57.09	M2XZA7	DNA replication factor Cdt1, putative	GO:0005634 GO:0003677 GO:0070182 GO:0000076 GO:0071163 GO:0000278 GO:0030174	Galdieria sulphuraria	70	1	0	0	0	0	0	0		0	0	0	0	0
	OG0006101	XP_752310.1	conserved DUF5315 domain-containing protein		Q4WTG0	Uncharacterized protein	na	A. fumigatus					212	55.94	A0A3R9HKC7	Uncharacterized protein	GO:0016020	Streptococcus oralis	44	69.12	A0A0F4YLD0	Uncharacterized protein	na	Rasamsonia emersonii	70	1	0	0	0	0	0	0		0	0	0	0	0
	OG0006044	CCU81527.1	hypothetical protein (translation)		N1JH20	Uncharacterized protein	na	B. graminis					128	62.72	G2Y1S2	Uncharacterized protein	na	Botryotinia fuckeliana	26	68.06	A0A2B7XVV6	Uncharacterized protein	na	Helicocarpus griseus	70	1	0	0	0	0	0	0		0	0	0	0	0
	OG0006010	XP_008597778.1	uncharacterized protein BBA_04459		J4KNY6	BTB domain-containing protein	na	B. bassiana					166	68.25	A0A2H4SI89	NUDIX hydrolase domain	GO:0016787	Cordyceps militaris	21	70.31	A0A504Z925	BTB/POZ domain-containing protein 3	GO:0005829 GO:0022008	Fasciola gigantica	70	1	0	0	0	0	0	0		0	1	0	0	0
	OG0006150	XP_754688.1	conserved RNA polymerase II mediator complex middle subunit MED9		Q4WXF3	Mediator of RNA polymerase II transcription subunit 9	GO:0016592 GO:0003712 GO:0006357	A. fumigatus																	69	0	0	1	0	0	0	0		0	0	0	0	0
	OG0006059	XP_960008.1	hypothetical protein NCU06146		Q7S5E2	Uncharacterized protein	na	N. crassa					170	73.06	C1FG38	GCF C-terminal domain-containing protein	GO:0005634 GO:0003677 GO:0000398	Micromonas commoda	113	75.06	A0A830CAK1	Pax3-and pax7-binding protein 1	GO:0071008 GO:0003677 GO:0000390	Phtheirospermum japonicum	68	2	0	0	0	0	0	0		0	0	0	0	0
	OG0005989	XP_962293.1	hypothetical protein NCU07707		Q7S9J9	Folliculin-interacting protein N-terminal domain-containing protein	GO:0005737 GO:0042030 GO:0051087	N. crassa																	68	2	0	0	0	0	0	0		0	0	0	0	0
	OG0006214	XP_011393249.1	uncharacterized protein NCU09144		V5IRM3	Uncharacterized protein	na	N. crassa					88	68.94	A0A093VA51	Nuclear factor erythroid 2-related factor 2	na	Talaromyces marneffei	19	66.56	A0A0B2WR40	Uncharacterized protein	na	Metarhizium album	68	0	0	1	0	0	0	0		0	0	0	0	0
	OG0006160	XP_008598647.1	uncharacterized protein BBA_05328		J4UM94	Karyogamy protein	na	B. bassiana					54	47.47	A0A1S3HBU0	Neurogenic protein mastermind isoform X3	GO:0016020	Lingula anatina	40	69.5	A0A1Q9DMC4	PPM-type phosphatase domain-containing protein	GO:0016020 GO:0004722	Symbiodinium microadriaticum	68	0	0	1	0	0	0	0		0	0	0	0	0
	OG0005719	XP_011393102.1	uncharacterized protein NCU03175		V5IRK8	Phosphoribosylaminoimidazole-succinocarboxamide synthase	GO:0016020	N. crassa																	68	0	0	1	0	0	0	0		0	0	0	0	0
	OG0006269	XP_752008.1	uncharacterized protein AFUA_4G08180		Q4WP64	Rrn9 domain-containing protein	GO:0031416 GO:0004596 GO:0032956	A. fumigatus																	67	0	0	1	0	0	0	0		0	0	0	0	0
	OG0006267	XP_963205.1	hypothetical protein NCU09481		Q7SC02	Uncharacterized protein	na	N. crassa					36	43.19	A0A086M6K0	Putative transmembrane protein	GO:0016020	Toxoplasma gondii	11	57.12	A0A545UZZ1	PAP2 superfamily protein	na	Cordyceps javanica	67	0	0	1	0	0	0	0		0	0	0	0	0
	OG0006113	XP_747342.2	conserved uncharacterized protein AFUA_8G05400		Q4WC80	SWI5-dependent HO expression protein 3	GO:0005789 GO:0003723 GO:0048309 GO:0051028	A. fumigatus																	67	0	0	1	0	0	0	0		0	0	0	0	0
	OG0006316	XP_748130.1	F-box domain protein		Q4WE85	F-box domain protein	na	A. fumigatus					260		A0A4S9MJW3	F-box domain-containing protein	na	Aureobasidium pullulans	30	77.75	A0A6P3YTJ8	F-box/LRR-repeat MAX2 homolog A-like	GO:0005634 GO:0019005 GO:0031146	Ziziphus jujuba	66	1	0	0	0	0	0	0		0	0	0	0	0
	OG0006315	XP_001822720.1	uncharacterized protein AO090102000569		Q2UA28	Uncharacterized protein	na	A. oryzae					66	37.12	A0A0E0QA26	Uncharacterized protein	GO:0009535	Oryza rufipogon	18	43.28	A0A0E0QA27	Uncharacterized protein	GO:0009535	Oryza rufipogon	66	0	0	1	0	0	0	0		0	0	0	0	0
	OG0006308	XP_008594196.1	uncharacterized protein BBA_00877		J5K0D4	Uncharacterized protein	na	B. bassiana					13	86.69	A0A2J8KVP6	ubiquitinyl hydrolase 1	GO:0004843	Pan troglodytes	19	86.81	A0A2J8UGL8	ubiquitinyl hydrolase 1	GO:0004843	Pongo abelii	66	1	0	0	0	0	0	0		0	0	0	0	0
	OG0006264	SLM40016.1	Short-chain dehydrogenase/reductase SDR		A0A1W5DA80	Short-chain dehydrogenase/reductase SDR	GO:0016020 GO:0016491	L. pustulata																	66	0	0	1	0	0	0	0		0	0	0	0	0
	OG0006205	XP_959038.1	hypothetical protein NCU07525		Q7S322	Myb-like domain-containing protein	na	N. crassa					5	38.38	A0A388KIV6	BHLH transcription factor	GO:0005634 GO:0003700 GO:0046983	Chara braunii	8	47.28	A0A0D7B2M5	GATA-type domain-containing protein	GO:0005634 GO:0043565 GO:0008270 GO:0006355	Cylindrobasidium torrendii	66	1	0	0	0	0	0	0		0	0	0	0	0
	OG0005845	XP_008600223.1	uncharacterized protein BBA_06904		J4W126	Uncharacterized protein	na	B. bassiana					176	65.69	A0A421J3S3	pH-response regulator protein palI/RIM9	GO:0032153 GO:0035838 GO:0005886	Meyerozyma sp.	54	64.44	A0A1E4RMB6	Pali-domain-containing protein	GO:0032153 GO:0035838 GO:0005886	Hyphopichia burtonii	66	1	0	0	0	0	0	0		0	0	0	0	0
	OG0005556	XP_751596.1	conserved uncharacterized protein AFUA_4G12350		Q4WQC6	Myosin heavy chain	GO:0009986	A. fumigatus																	66	0	0	1	0	0	0	0		0	0	0	0	0
	OG0005508	XP_962664.1	hypothetical protein NCU07994		Q7SAP6	Ubiquitin carrier protein	GO:0016020	N. crassa																	66	1	0	0	0	0	0	0		0	0	0	0	0
absent	OG0003849	NP_010195.1	YDL088C ASM4, FG-nucleoporin component of central core of nuclear pore complex (NPC)		Q05166	Nucleoporin ASM4, Nuclear pore protein NUP59	GO:0005635 GO:0031965 GO:0005643 GO:0044613 GO:0044615 GO:0005543 GO:0003697 GO:0017056 GO:0007049 GO:0051301 GO:0031990 GO:0006607 GO:0006999 GO:0006913	S. cerevisiae																	0	52	11	70	2	16	14	8		1	1	1	1	1
	OG0003974	NP_013000.3	YKR074W AIM29		P36154	Altered inheritance rate of mitochondria protein 29	GO:0005737	S. cerevisiae																	2	52	10	66	2	16	14	10		0	1	1	0	1
na, not available.
1, A. fumigatus, Aspergillus fumigatus; A. oryzae, Aspergillus oryzae; B. bassiana, Beauveria bassiana; B. graminis, Blumeria graminis; B. hordei, Blumeria hordei; E. spinifera, Exophiala spinifera; L. pustulata, Lasallia pustulata; N. crassa, Neurospora crassa; P. oryzae, Pyricularia oryzae; S. cerevisiae, Saccharomyces cerevisiae; U. necator, Uncinula necator.
	present in >90% species
	present in >60% and <=90 species
	present in >30% and <=60 species
	present in model organism

## Sheet: S5b
Supplementary Table 5b. OGs that characterise Saccharomycotina (characteristically present and characteristically absent OGs).
present/absent	OG ID	Genbank			UniProt				Model organism				Alphafold												Pezizomycotina (72)	Saccharomycotina (54)	Taphrinomycotina (11)	Agaricomycotina (71)	Wallemiomycotina (2)	Pucciniomycotina (17)	Ustilaginomycotina (15)	early-diverging lineages (17)		Drosophila melanogaster	Dictyostelium discoideum	Homo sapiens	Arabidopsis thaliana	Caenorhabditis elegans
													AFDB50/MMseqs2						AFDB/Foldseek
		representative protein ID	gene description in a reference genome	domain search result	ID	protein name	GO	reference genome used1	ID	protein name	GO	reference genome used	# of accessions found	Average pLDDT	UniProt ID	protein name	GO	reference genome used	# of accessions found	Average pLDDT	UniProt ID	protein name	GO	reference genome used
present	OG0006754	NP_009744.3	YBR185C MBA1	Membrane-associated mitoribosome receptor	P38300	Inner membrane mitoribosome receptor MBA1, mitochondrial	GO:0005743 GO:0005739 GO:0097177 GO:0043022 GO:0007007 GO:0070131 GO:0032979	S. cerevisiae																	0	54	0	0	0	0	0	0		0	0	0	0	0
	OG0006677	NP_010509.1	YDR223W CRF1	Transcriptional corepressor	Q04930	Transcription factor CRF1	GO:0000785 GO:0005737 GO:0005634 GO:0003712 GO:0003714 GO:0010688 GO:0006357	S. cerevisiae																	0	54	0	0	0	0	0	0		0	0	0	0	0
	OG0006676	NP_010986.1	YER064C VHR2	Non-essential nuclear protein	P40041	Transcription factor VHR2	GO:0005737 GO:0005634 GO:0003677 GO:0006355	S. cerevisiae																	0	54	0	0	0	0	0	0		0	0	0	0	0
	OG0004373	NP_010235.1	YDL048C STP4	Protein containing a Kruppel-type zinc-finger domain	Q07351	Zinc finger protein STP4	GO:0005737 GO:0005739 GO:0005634 GO:0000981 GO:0046872 GO:0000978 GO:0043565 GO:0006357	S. cerevisiae																	0	54	0	0	0	0	0	0		0	0	0	0	0
	OG0006902	NP_013664.1	YML048W GSF2	Endoplasmic reticulum (ER) localized integral membrane protein	Q04697	Glucose-signaling factor 2	GO:0005737 GO:0005783 GO:0005789 GO:0005741 GO:0051082 GO:0006457 GO:0034394	S. cerevisiae																	0	52	0	0	0	0	0	0		0	0	0	0	0
	OG0006897	NP_010582.3	YDR296W MHR1	Mitochondrial ribosomal protein of the large subunit	Q06630	Large ribosomal subunit protein mL67	GO:0005743 GO:0005762 GO:0005739 GO:0005634 GO:0003677 GO:0000150 GO:0003697 GO:0003735 GO:0034599 GO:0006310 GO:0000002 GO:0032543 GO:0090297 GO:0006355	S. cerevisiae																	0	52	0	0	0	0	0	0		0	0	0	0	0
	OG0006807	NP_009914.2	YCL014W BUD3	Guanine nucleotide exchange factor (GEF) for Cdc42p	P25558	Bud site selection protein 3	GO:0005935 GO:0000142 GO:0005085 GO:0007120 GO:0000755	S. cerevisiae																	0	52	0	0	0	0	0	0		0	0	0	0	0
	OG0006539	NP_010563.3	YDR277C MTH1	Negative regulator of the glucose-sensing signal transduction pathway	P35198	Protein MTH1	GO:1904659 GO:0007165	S. cerevisiae																	0	52	0	0	0	0	0	0		0	0	0	0	0
	OG0006943	NP_012469.3	YJL066C MPM1	Mitochondrial intermembrane space protein of unknown function	P40364	Mitochondrial peculiar membrane protein 1	GO:0005758 GO:0031966 GO:0005739	S. cerevisiae																	0	51	0	0	0	0	0	0		0	0	0	0	0
	OG0006941	NP_010176.1	YDL107W MSS2	Peripherally bound inner membrane protein of the mitochondrial matrix	P40990	Protein MSS2, mitochondrial	GO:0005743 GO:0005759 GO:0032979	S. cerevisiae																	0	51	0	0	0	0	0	0		0	0	0	0	0
	OG0006896	NP_011834.1	YHL029C OCA5	Cytoplasmic protein required for replication of Brome mosaic virus	P38738	Oxidant-induced cell-cycle arrest protein 5	GO:0005737	S. cerevisiae																	0	51	0	0	0	0	0	0		0	0	0	0	0
	OG0006894	NP_011644.3	YGR128C UTP8	Nucleolar protein required for export of tRNAs from the nucleus	P53276	U3 small nucleolar RNA-associated protein 8	GO:0030686 GO:0005730 GO:0033553 GO:0032040 GO:0034455 GO:0000049 GO:0034511 GO:0030490 GO:0000462 GO:0045943 GO:0006409	S. cerevisiae																	0	51	0	0	0	0	0	0		0	0	0	0	0
	OG0005510	NP_013495.1	YLR390W-A CCW14	Covalently linked cell wall glycoprotein; present in the inner layer of the cell wall	O13547	Covalently-linked cell wall protein 14	GO:0071944 GO:0005576 GO:0009277 GO:0005739 GO:0098552 GO:0005199 GO:0031505	S. cerevisiae																	0	51	0	0	0	0	0	0		0	0	0	0	0
	OG0006994	NP_009886.1	YCL044C MGR1	Subunit of the mitochondrial (mt) i-AAA protease supercomplex	P25573	Mitochondrial inner membrane i-AAA protease supercomplex subunit MGR1	GO:0031942 GO:0005739 GO:0051787 GO:0030163 GO:0045041 GO:0006515	S. cerevisiae																	0	50	0	0	0	0	0	0		0	0	0	0	0
	OG0006855	NP_009494.1	YBL059W	Putative mitochondrial hypothetical protein; the authentic, non-tagged protein is detected in highly purified mitochondria in high-throughput studies; IAI11 has a paralog, YER093C-A, that arose from the whole genome duplication	P34224	Uncharacterized protein YBL059W	GO:0031966 GO:0005739	S. cerevisiae																	0	50	0	0	0	0	0	0		0	0	0	0	0
	OG0006854	NP_015248.1	YPL077C	hypothetical protein; regulates PIS1 expression; mutant displays spore wall assembly defect in ether sensitivity screen; YPL077C is not an essential gene; YPL077C has a paralog, YBR197C, that arose from the whole genome duplication	Q02831	Uncharacterized protein YPL077C	na	S. cerevisiae					20	52.38	A0A259F5J8	Uncharacterized protein	GO:0016020	Hydrogenophilales bacterium 17-64-65	14	66.06	A0A2N2U148	Uncharacterized protein	GO:0016020	Betaproteobacteria bacterium HGW-Betaproteobacteria-17	0	50	0	0	0	0	0	0		0	0	0	0	0
	OG0006995	NP_009831.3	YBR272C HSM3	Evolutionarily conserved 19S regulatory particle assembly-chaperone	P38348	DNA mismatch repair protein HSM3	GO:0005737 GO:0005829 GO:0005634 GO:0006298 GO:0070682	S. cerevisiae																	0	49	0	0	0	0	0	0		0	0	0	0	0
	OG0006853	NP_009524.1	YBL029W	Non-essential protein of unknown function	P38201	Uncharacterized protein YBL029W	GO:0005737 GO:0005634	S. cerevisiae																	0	49	0	0	0	0	0	0		0	0	0	0	0
	OG0005511	NP_014958.3	YOR313C SPS4	Protein whose expression is induced during sporulation, Lipid droplet protein implicated in sporulation	P09937	Sporulation-specific protein 4	GO:0005811 GO:0030437	S. cerevisiae																	0	49	0	0	0	0	0	0		0	0	0	0	0
	OG0006634	NP_116685.1	YFR029W PTR3		P43606	SPS-sensor component PTR3	GO:0005886 GO:0043200	S. cerevisiae																	2	53	0	1	0	0	0	0		0	0	0	0	0
	OG0006711	NP_012379.2	YJL156C SSY5	Peptidase family S64	P47002	SPS-sensor serine protease component SSY5	GO:0005886 GO:0004252 GO:0016540 GO:0016485 GO:0043200	S. cerevisiae																	1	53	0	1	0	0	0	0		0	0	0	0	0
	OG0006806	NP_010440.1	YDR156W RPA14	DNA-directed RNA polymerase I subunit RPA14	P50106	DNA-directed RNA polymerase I subunit RPA14	GO:0005634 GO:0005736 GO:0003899 GO:0042790 GO:0008361 GO:0042254 GO:0006363 GO:0006360 GO:0006362 GO:0006361	S. cerevisiae																	0	52	0	2	0	0	0	0		0	0	0	0	0
	OG0006811	NP_009814.3	YBR255W MTC4		P38335	Maintenance of telomere capping protein 4	GO:0005737 GO:0005811 GO:0016020 GO:0005777	S. cerevisiae																	0	52	0	1	0	0	0	0		0	0	0	0	0
	OG0006895	NP_012931.4	YKR006C MRPL13	mitochondrial 54S ribosomal protein YmL1	Q02204	Large ribosomal subunit protein mL50	GO:0005743 GO:0005762 GO:0005739 GO:0003735 GO:0032543	S. cerevisiae																	0	51	0	1	0	0	0	0		0	0	0	0	0
	OG0006809	NP_009688.3	YBR130C SHE3	SWI5-dependent HO expression protein 3	P38272	SWI5-dependent HO expression protein 3	GO:0005934 GO:0005737 GO:0005789 GO:0003729 GO:1990825 GO:0048309 GO:0008298 GO:0007533 GO:0051028	S. cerevisiae																	0	49	0	1	0	0	0	1		0	0	0	0	0
absent	OG0003482	NP_595488.1	C2H2-type zinc finger domain-containing protein		O94326	NURS complex subunit pir2	GO:0000785 GO:1990477 GO:0016604 GO:0005634 GO:0106222 GO:0008270 GO:0071039 GO:0031047 GO:0031048	S. pombe																	71	2	11	69	2	16	14	16		1	1	1	1	1
	OG0003597	NP_592928.1	RhoGEF Gef2		Q09733	Rho guanine nucleotide exchange factor gef2	GO:0032153 GO:0005737 GO:0005829 GO:0071341 GO:0110085 GO:0120105 GO:0044732 GO:0005085 GO:0000917 GO:0035556 GO:1902408	S. pombe																	71	0	10	69	2	17	14	10		0	0	1	0	0
	OG0003793	NP_596166.1	bouquet formation protein Bqt4		O60158	Bouquet formation protein 4	GO:0005737 GO:0005635 GO:0005637 GO:1990862 GO:0005634 GO:0003677 GO:0140473 GO:0051301 GO:0070197 GO:0045141 GO:0044821 GO:0044820 GO:0000723 GO:0032200	S. pombe																	70	0	11	68	2	17	15	1		0	0	0	0	0
na, not available.
1, S. cerevisiae, Saccharomyces cerevisiae; S. pombe, Schizosaccharomyces pombe.
	present in >90% species
	present in >60% and <=90 species
	present in >30% and <=60 species
	present in model organism

## Sheet: S5c
Supplementary Table 5c. OGs that characterise Taphnimomycotina (characteristically present OGs).
present/absent	OG ID	Genbank			UniProt				Model organism				Alphafold												Pezizomycotina (72)	Saccharomycotina (54)	Taphrinomycotina (11)	Agaricomycotina (71)	Wallemiomycotina (2)	Pucciniomycotina (17)	Ustilaginomycotina (15)	early-diverging lineages (17)		Drosophila melanogaster	Dictyostelium discoideum	Homo sapiens	Arabidopsis thaliana	Caenorhabditis elegans
													AFDB50/MMseqs2						AFDB/Foldseek
		representative protein ID	gene description in a reference genome	domain search result	ID	protein name	GO	reference genome used1	ID	protein name	GO	reference genome used	# of accessions found	Average pLDDT	UniProt ID	protein name	GO	reference genome used	# of accessions found	Average pLDDT	UniProt ID	protein name	GO	reference genome used
present	OG0015705	NP_587927.1	meiotically upregulated gene Mug123		O74461	Meiotically up-regulated gene 123 protein	GO:0005829 GO:0005634 GO:0051321 GO:0030435	S. pombe																	0	0	10	0	0	0	0	0		0	0	0	0	0
	OG0008608	NP_596288.2	guanyl-nucleotide exchange factor Lam2		Q9Y7J2	Uncharacterized protein C1778.05c	GO:0005829 GO:0000329 GO:0005634 GO:0071986 GO:0005085 GO:0043495 GO:0071230 GO:1904262 GO:0032008 GO:1903432	S. pombe																	1	0	10	0	0	0	0	13		1	1	1	0	1
absent	no data
1, S. pombe, Schizosaccharomyces pombe.
	present in >90% species
	present in >60% and <=90 species
	present in >30% and <=60 species
	present in model organism

## Sheet: S5d
Supplementary Table 5d. OGs that characterise Agaricomycotina (characteristically present and characteristically absent OGs).
present/absent	OG ID	Genbank			UniProt				Model organism				Alphafold												Pezizomycotina (72)	Saccharomycotina (54)	Taphrinomycotina (11)	Agaricomycotina (71)	Wallemiomycotina (2)	Pucciniomycotina (17)	Ustilaginomycotina (15)	early-diverging lineages (17)		Drosophila melanogaster	Dictyostelium discoideum	Homo sapiens	Arabidopsis thaliana	Caenorhabditis elegans
													AFDB50/MMseqs2						AFDB/Foldseek
		representative protein ID	gene description in a reference genome	domain search result	ID	protein name	GO	reference genome used1	ID	protein name	GO	reference genome used	# of accessions found	Average pLDDT	UniProt ID	protein name	GO	reference genome used	# of accessions found	Average pLDDT	UniProt ID	protein name	GO	reference genome used
present	OG0005667	EUC62227.1	hypothetical protein RSOL_414490	Kinetochore protein Mis14 like; pfam08641	X8JES0	Uncharacterized protein	GO:0000776 GO:0000070	R. solani																	0	0	0	68	1	0	0	8		0	0	0	0	0
	OG0005733	XP_007004350.1	uncharacterized protein TREMEDRAFT_73656		A0A4V1M4V5	PX domain-containing protein	na	T. mesenterica					36	68.5	A0A1B9HS56	DNA replication regulator Sld3 C-terminal domain-containing protein	na	Kwoniella pini	41	42.91	A0A087UMG1	Neuronal PAS domain-containing protein 2	GO:0034751 GO:0005634 GO:0000981 GO:0000978	Stegodyphus mimosarum	0	0	0	68	2	0	0	1		0	0	0	0	0
	OG0004444	EUC64032.1	GDP-fucose protein O-fucosyltransferase	GDP-fucose protein O-fucosyltransferase and related proteins; cd11296	X8JJS7	GDP-fucose protein O-fucosyltransferase	GO:0016020 GO:0016757 GO:0006004	R. solani																	0	0	0	65	0	0	0	2		0	0	0	0	0
	OG0004689	EUC62021.1	Rap1 myb domain protein, partial	DNA-binding modules of yeast Rap1 and related proteins; cd11655	X8JFE6	DNA-binding protein RAP1	GO:0000781 GO:0005634 GO:0003677 GO:0006355 GO:0010833	R. solani																	0	0	0	71	1	0	0	0		0	0	0	0	0
	OG0005049	EUC64064.1	glutaredoxin domain protein	Protein Disulfide Oxidoreductases and Other Proteins with a Thioredoxin fold; cl00388	X8JK50	Glutaredoxin domain protein	GO:0016020	R. solani																	0	0	0	66	0	0	0	0		0	0	0	0	0
	OG0005518	XP_007775655.1	uncharacterized protein CONPUDRAFT_160342		R7SGX7	DNA replication regulator Sld3 C-terminal domain-containing protein	GO:0031261 GO:0006270	C. puteana																	0	0	0	64	0	0	0	0		0	0	0	0	0
	OG0005563	EUC59388.1	ser-thr-rich glycosyl-phosphatidyl-inositol-anchored membrane family protein	Ser-Thr-rich glycosyl-phosphatidyl-inositol-anchored membrane family; pfam10342	A0A0A1ULW7	Ser-thr-rich glycosyl-phosphatidyl-inositol-anchored membrane family protein	na	R. solani					502	87.75	A0A286XB57	Ig-like domain-containing protein	GO:0005886 GO:0050766 GO:0050870	Cavia porcellus	205	90.25	A0A3P9K094	Ig-like domain-containing protein	GO:0005912 GO:0043296 GO:0016020 GO:0007157 GO:0007156	Oryzias latipes	0	0	0	69	0	0	0	0		0	0	0	0	0
	OG0005641	KZT26223.1	hypothetical protein NEOLEDRAFT_1063653		A0A165T6T0	Fungal-type protein kinase domain-containing protein	na	N. lepideus					18	82.62	A0A0C3DXF7	BTB domain-containing protein	na	Scleroderma citrinum	30	73.19	A0A372Q517	Uncharacterized protein	GO:0016020	Rhizophagus sp. MUCL 43196	0	0	0	69	0	0	0	0		0	0	0	0	0
	OG0005824	EUC67121.1	BTG family protein	BTG family; cl15439	X8JVB8	BTG family protein	na	R. solani					48	73.19	A0A5B1QRL0	Anti-proliferative protein domain-containing protein	GO:0005737 GO:0005634 GO:0045930	Dentipellis sp. KUC8613	31	75.69	A0A4Y7QNI5	Anti-proliferative protein domain-containing protein	GO:0005737 GO:0005634 GO:0045930	Rickenella mellea	0	0	0	70	0	0	0	0		0	0	0	0	0
	OG0005855	KZT19218.1	hypothetical protein NEOLEDRAFT_1183592	Mevalonate 5-diphosphate decarboxylase C-terminal domain; cl28577	A0A165N5X8	Uncharacterized protein	GO:0005829 GO:0004163 GO:0019287	N. lepideus																	0	0	0	67	0	0	0	0		0	0	0	0	0
	OG0005936	EUC59692.1	GDP-mannose transporter, partial	pfam03980	A0A0A1UL15	GDP-mannose transporter	GO:0000444 GO:0005634 GO:0007049 GO:0051301	R. solani																	0	0	0	66	0	0	0	0		0	0	0	0	0
	OG0005971	KLT43372.1	hypothetical protein CC85DRAFT_327319	DNA translocase FtsK; Provisional	A0A0J0XQK9	Transcription factor domain-containing protein	na	C. oleaginosum					7	66.31	A0A165MPW2	Transcription factor domain-containing protein	na	Daedalea quercina	35	61.31	A0A0C3QNE7	Glycosyltransferase family 48 protein	na	Tulasnella calospora	0	0	0	64	2	0	0	0		0	0	0	0	0
	OG0005977	EUC56652.1	DUTPase domain protein, RSOL_190390		X8J405	dUTPase domain protein	na	R. solani					131	85.62	A0A0K6G6V2	Toll-like receptor 5	na	Rhizoctonia solani	103	88.19	A0A453DIV9	NB-ARC domain-containing protein	GO:0043531 GO:0098542	Aegilops tauschii subsp. strangulata	0	0	0	69	0	0	0	0		0	0	0	0	0
	OG0006023	EUC54921.1	hypothetical protein RSOL_077010	transcriptional regulator ICP4; Provisional, Domain of unknown function (DUF1720); pfam08226	X8J0V6	DUF1720 domain-containing protein	GO:0005737 GO:0016020 GO:0006897	R. solani																	0	0	0	65	2	0	0	0		0	0	0	0	0
	OG0006081	EUC61601.1	transmembrane protein, putative		X8JE71	Transmembrane protein, putative	GO:0016020	R. solani																	0	0	0	69	0	0	0	0		0	0	0	0	0
	OG0006082	AAW41229.1	hypothetical protein CNA07320	Chromosome segregation ATPase Smc [Cell cycle control, cell division, chromosome partitioning]; COG1196	Q5KN89	Up-regulated during septation protein 1 domain-containing protein	na	C. neoformans					152	78.5	A0A6J1VQL3	Golgin subfamily A member 2 isoform X1	GO:0005801 GO:0000137 GO:0032580 GO:0007030 GO:0051225	Notechis scutatus	63	81.17	A0A0N4UK33	Myosin_tail_1 domain-containing protein	GO:0005737 GO:0032982 GO:0016460 GO:0051015 GO:0000146	Dracunculus medinensis	0	0	0	69	0	0	0	0		0	0	0	0	0
	OG0006143	AAW40812.2	hypothetical protein CNA02390		Q5KPL3	HIT domain-containing protein	na	C. neoformans					38	49.88	A0A4S2QUD3	Uncharacterized protein	GO:0016020	Wolbachia endosymbiont of Aedes albopictus	42	57.84	A0A3D0MXK0	Uncharacterized protein	GO:0016020	Bacteroidota bacterium	0	0	0	67	0	0	0	0		0	0	0	0	0
	OG0006195	AAW46138.1	hypothetical protein CNK00920	large tegument protein UL36; Provisional	Q5K9S6	Uncharacterized protein	na	C. neoformans					14	33.34	A0A034VQ77	Mucin-5AC	na	Bactrocera dorsalis	21	43.84	A0A4V1IW11	Uncharacterized protein	GO:0016020	Thamnocephalis sphaerospora	0	0	0	66	0	0	0	0		0	0	0	0	0
	OG0006197	EUC59761.1	endoplasmic reticulum-based factor for assembly of V-ATPase	Endoplasmic reticulum-based factor for assembly of V-ATPase; pfam11712	A0A0A1UM47	Endoplasmic reticulum-based factor for assembly of V-ATPase	GO:0005789 GO:0070072	R. solani																	0	0	0	65	0	0	0	0		0	0	0	0	0
	OG0006250	KLT41060.1	hypothetical protein CC85DRAFT_130322	large tegument protein UL36; Provisional, DNA polymerase III subunit gamma/tau	A0A0J0XIY9	Uncharacterized protein	na	C. oleaginosum					32	57.95	C0NJ81	Nuclear localization protein	GO:0016586 GO:0031490	Ajellomyces capsulatus	16	60.15	C1GWK1	Nuclear localization protein	GO:0016586 GO:0031490	Paracoccidioides lutzii	0	0	0	65	0	0	0	0		0	0	0	0	0
	OG0006288	XP_001833687.2	hypothetical protein CC1G_03904	transcriptional regulator ICP4; Provisional	A8NH57	Proteophosphoglycan ppg4	na	C. cinerea					6	41.75	A0A1G4B580	Proteophosphoglycan ppg4	na	Colletotrichum orchidophilum	4	43.09	L2G991	Proteophosphoglycan ppg4	na	Colletotrichum fructicola	0	0	0	64	0	0	0	0		0	0	0	0	0
	OG0006325	XP_001835710.2	hypothetical protein CC1G_07134	G-patch domain; pfam01585	A8NR67	G-patch domain-containing protein	na	C. cinerea					2	35.94	Q17L21	AAEL001481-PA	na	Aedes aegypti	8	40.69	A0A834H5S8	Uncharacterized protein	GO:0016020	Rhododendron simsii	0	0	0	65	0	0	0	0		0	0	0	0	0
	OG0001627	EUC55877.1	F-box protein, putative		X8J1S4	F-box protein, putative	na	R. solani					47	83.25	A0A1Y2BIS9	F-box domain-containing protein	na	Naematelia encephala	45	78.06	A0A1S3IBN6	Echinoderm microtubule-associated protein-like 2	GO:0005874 GO:0072686 GO:0008017 GO:0035556 GO:0000226	Lingula unguis	1	0	0	71	0	0	0	0		0	0	0	0	0
	OG0006193	EUC64224.1	hypothetical protein RSOL_437440		X8JKL9	RNI-like protein	na	R. solani					18	54.41	A0A836G8H0	CHAD protein	GO:0031012 GO:0005615	Acromyrmex charruanus	39		A0A2K1ZH88	Protein kinase domain-containing protein	GO:0016020 GO:0005524 GO:0004672	Populus trichocarpa	1	0	0	65	0	0	0	0		0	0	0	0	0
absent	OG0003944	NP_012803.1	Vph2p	Endoplasmic reticulum-based factor for assembly of V-ATPase; pfam11712	P32341	Vacuolar ATPase assembly integral membrane protein VPH2	GO:0012505 GO:0005783 GO:0005789 GO:1990871 GO:0007035 GO:0070072	S. cerevisiae																	70	51	10	0	2	16	15	13		0	1	0	1	0
na, not available.
1, C. cinerea, Coprinopsis cinerea; C. neoformans, Cryptococcus neoformans; C. oleaginosum, Cutaneotrichosporon oleaginosum; C. puteana, Coniophora puteana; N. lepideus, Neolentinus lepideus; R. solani, Rhizoctonia solani; S. cerevisiae, Saccharomyces cerevisiae; T. mesenterica, Tremella mesenterica.
	present in >90% species
	present in >60% and <=90 species
	present in >30% and <=60 species
	present in model organism

## Sheet: S5e
Supplementary Table 5e. OGs that characterise Pucciniomycotina (characteristically present and characteristically absent OGs).
present/absent	OG ID	Genbank			UniProt				Model organism				Alphafold												Pezizomycotina (72)	Saccharomycotina (54)	Taphrinomycotina (11)	Agaricomycotina (71)	Wallemiomycotina (2)	Pucciniomycotina (17)	Ustilaginomycotina (15)	early-diverging lineages (17)		Drosophila melanogaster	Dictyostelium discoideum	Homo sapiens	Arabidopsis thaliana	Caenorhabditis elegans
													AFDB50/MMseqs2						AFDB/Foldseek
		representative protein ID	gene description in a reference genome	domain search result	ID	protein name	GO	reference genome used1	ID	protein name	GO	reference genome used	# of accessions found	Average pLDDT	UniProt ID	protein name	GO	reference genome used	# of accessions found	Average pLDDT	UniProt ID	protein name	GO	reference genome used
present	OG0011394	XP_003331767.1	hypothetical protein PGTG_13576		E3KSW2	Uncharacterized protein	GO:0016020	P. graminis																	0	0	0	0	0	17	0	0		0	0	0	0	0
	OG0011385	XP_016272003.1	hypothetical protein RHTO_02240	leucine-rich repeat [structural motif]	M7XAV9	Proteophosphoglycan ppg4	na	R. toruloides					8	45.12	A0A6A6NG35	X8 domain-containing protein	GO:0005739 GO:0050152 GO:0006528 GO:0006541 GO:0006107	Hevea brasiliensis	12	58.41	A0A5J4ZZB4	CN hydrolase domain-containing protein	GO:0005739 GO:0050152 GO:0006528 GO:0006541 GO:0006107	Nyssa sinensis	0	0	0	0	0	17	0	0		0	0	0	0	0
	OG0006875	XP_003319715.2	hypothetical protein PGTG_01889	BDLF3; Provisional, alpha/beta hydrolases; cl21494	E3JTH1	Fungal lipase-like domain-containing protein	GO:0006629	P. graminis																	0	0	0	0	0	17	0	0		0	0	0	0	0
	OG0011388	XP_016275744.1	hypothetical protein RHTO_04804		M7X3E2	Uncharacterized protein	na	R. toruloides					19	69.06	A0A166VNI0	Protein FAF1	GO:0005730 GO:0000462	Fibularhizoctonia sp. CBS 109695	27	70.75	A0A5N6KZI4	Ribosomal RNA-processing protein 14/surfeit locus protein 6 C-terminal domain-containing protein	GO:0005730 GO:0000462	Carpinus fangiana	0	0	0	0	0	16	0	0		0	0	0	0	0
	OG0011086	XP_016277158.1	BRCT domain containing protein	C-terminal domain of the breast cancer suppressor protein (BRCA1) and related domains; cd00027, Caldesmon; pfam02029	M7XQ38	BRCT domain containing protein	GO:0030870 GO:0006302 GO:0007095	R. toruloides																	0	0	0	0	0	16	0	0		0	0	0	0	0
	OG0010520	XP_003328542.1	hypothetical protein PGTG_10501	amidase domain-containing protein	E3KIJ8	Extracellular membrane protein CFEM domain-containing protein	na	P. graminis					10		na				7	62.66	G7E6N0	Extracellular membrane protein CFEM domain-containing protein	GO:0016020	Mixia osmundae	0	0	0	0	0	16	0	0		0	0	0	0	0
	OG0010279	XP_016270656.1	uncharacterized protein RHTO_04311	Family of unknown function (DUF6534); pfam20152	M7WGH8	DUF6534 domain-containing protein	GO:0016020	R. toruloides																	0	0	0	0	0	16	0	0		0	0	0	0	0
	OG0009273	XP_003321417.2	uncharacterized protein PGTG_02459	phosphodiesterase; Provisional	E3JY73	RRM domain-containing protein	GO:0005634 GO:0003723 GO:0016973	P. graminis																	0	0	0	0	0	16	0	0		0	0	0	0	0
	OG0005852	XP_016276347.1	Y-box-binding protein 2		M7XY72	Y-box-binding protein 2	GO:0005737 GO:0005634 GO:0003729 GO:0031054	R. toruloides																	3	0	0	1	0	17	0	12		1	0	1	1	1
	OG0004690	XP_016275965.1	acyltransferase domain-containing protein		M7X3F1	Acyltransferase domain-containing protein	GO:0016746 GO:0016985 GO:0006080	R. toruloides																	1	0	0	1	0	17	0	3		0	1	0	0	0
	OG0011386	XP_003331464.2	uncharacterized protein PGTG_13264		E3KRX0	Uncharacterized protein	na	P. graminis					20	60.88	A0A2S5B362	Uncharacterized protein	na	Rhodotorula taiwanensis	9	67.19	A0A0D2A666	Uncharacterized protein	na	Verruconis gallopava	0	0	0	1	0	16	0	0		0	0	0	0	0
	OG0011088	XP_014571185.1	uncharacterized protein L969DRAFT_69772		G7DZD9	Uncharacterized protein	na	M. osmundae					2	42.25	A0A4W5R3M9	Uncharacterized protein	na	Hucho hucho	15		A0A7J8H6I9	Splicing factor, suppressor of white-apricot homolog	GO:0003723 GO:0000395	Rousettus aegyptiacus	0	0	0	1	0	16	0	0		0	0	0	0	0
absent	OG0002946	NP_015221.1	aspartate--tRNA ligase MSD1	Mitochondrial aspartyl-tRNA synthetase; required for acylation of aspartyl-tRNA; yeast and bacterial aspartyl-_ asparaginyl-_ and lysyl-tRNA synthetases contain regions with high sequence similarity_ suggesting a common ancestral gene	P15179	Aspartate--tRNA ligase, mitochondrial	GO:0005759 GO:0005739 GO:0004815 GO:0005524 GO:0003676 GO:0006422 GO:0070146	S. cerevisiae																	72	54	11	71	2	0	15	13		1	1	1	1	1
	OG0003172	NP_015495.2	JIP5	Protein required for biogenesis of the large ribosomal subunit; required for biogenesis of the large ribosomal subunit; interacts with proteins involved in RNA processing_ ribosome biogenesis_ ubiquitination and demethylation; similar to WDR55_ a human WD repeat protein; essential gene	Q06214	WD repeat-containing protein JIP5	GO:0005730 GO:0005634 GO:0042273	S. cerevisiae																	72	51	11	67	2	0	15	15		1	1	1	1	1
	OG0002817	NP_010507.3	YDR221W GTB1	Glucosidase II beta subunit-like	Q04924	Glucosidase 2 subunit beta	GO:0005783 GO:0005788 GO:0017177 GO:0070880 GO:0006491 GO:0000271	S. cerevisiae																	72	54	11	71	2	1	15	16		1	1	1	1	1
na, not available.
1, M. osmundae, Mixia osmundae; P. graminis, Puccinia graminis; R. toruloides, Rhodotorula toruloides; S. cerevisiae, Saccharomyces cerevisiae.
	present in >90% species
	present in >60% and <=90 species
	present in >30% and <=60 species
	present in model organism

## Sheet: S5f
Supplementary Table 5f. OGs that characterise Ustilaginomycotina (characteristically present and characteristically absent OGs).
present/absent	OG ID	Genbank			UniProt				Model organism				Alphafold												Pezizomycotina (72)	Saccharomycotina (54)	Taphrinomycotina (11)	Agaricomycotina (71)	Wallemiomycotina (2)	Pucciniomycotina (17)	Ustilaginomycotina (15)	early-diverging lineages (17)		Drosophila melanogaster	Dictyostelium discoideum	Homo sapiens	Arabidopsis thaliana	Caenorhabditis elegans
													AFDB50/MMseqs2						AFDB/Foldseek
		representative protein ID	gene description in a reference genome	domain search result	ID	protein name	GO	reference genome used1	ID	protein name	GO	reference genome used	# of accessions found	Average pLDDT	UniProt ID	protein name	GO	reference genome used	# of accessions found	Average pLDDT	UniProt ID	protein name	GO	reference genome used
present	OG0010816	CCF53275.1	uncharacterized protein UHOR_02731	lysozyme-like domains; cl00222	I2G282	Transglycosylase SLT domain-containing protein	na	U. hordei					1	50.59	A0A1K0G1N5	Transglycosylase SLT domain-containing protein	na	Ustilago bromivora	2	70.94	A0A316Z5R1	Transglycosylase SLT domain-containing protein	na	Tilletiopsis washingtonensis	0	0	0	0	0	0	14	0		0	0	0	0	0
	OG0011426	CCF48804.1	uncharacterized protein UHOR_08831	DNA-binding modules of yeast Rap1 and related proteins; cd11655	I2FPG1	BRCT domain-containing protein	GO:0005694	U. hordei																	0	0	0	0	0	0	15	0		0	1	0	0	0
	OG0011427	CCF52526.1	uncharacterized protein UHOR_04632		I2G033	Uncharacterized protein	na	U. hordei					2		na		na		3		na		na		0	0	0	0	0	0	15	0		0	0	0	0	0
	OG0011430	XP_014655596.1	uncharacterized protein PAN0_012c4573	Subunit 17 of Mediator complex; pfam10156	A0A081CI55	Mediator of RNA polymerase II transcription subunit 17	GO:0016592 GO:0003712 GO:0006357	M. antarcticus																	0	0	0	0	0	0	14	0		0	0	0	0	0
	OG0011796	XP_014653604.1	uncharacterized protein PAN0_050d6437		A0A081CNF5	Uncharacterized protein	na	M. antarcticus					21	39.72	A0A3B0J7U4	Blast:Forkhead box protein N3	GO:0005634 GO:0000981 GO:0000978	Drosophila guanche	19	63.66	R9AKR1	F-box-like/WD repeat-containing protein TBL1XR1	GO:0071013 GO:0005686 GO:0071004 GO:0003723 GO:0045292 GO:0000381	Wallemia ichthyophaga	0	0	0	0	0	0	15	0		0	0	0	0	0
	OG0011797	CCF52337.1	uncharacterized protein UHOR_03394	PPR repeat [structural motif]	I2FZJ4	Uncharacterized protein	na	U. hordei					1184	86.19	R0GUW4	Pentacotripeptide-repeat region of PRORP domain-containing protein	GO:0043231 GO:0003723 GO:0009451	Capsella rubella	201	87.24	Q3E9N1	Pentatricopeptide repeat-containing protein At4g39952, mitochondrial	GO:0005739 GO:0003723 GO:0009451	Arabidopsis thaliana	0	0	0	0	0	0	15	0		0	0	0	0	0
	OG0011798	XP_014656803.1	uncharacterized protein PAN0_007c3232	large tegument protein UL36; Provisional	A0A081CEC0	Uncharacterized protein	na	M. antarcticus					21	47.34	A0A0V0ZNJ5	F-box only protein 30	GO:0061630 GO:0008270	Trichinella patagoniensis	11	47.38	E5S5E0	F-box only protein 30	GO:0061630 GO:0008270	Trichinella spiralis	0	0	0	0	0	0	15	0		0	0	0	0	0
	OG0011799	XP_001728689.1	hypothetical protein MGL_4168	MAEBL; Provisional	A8QDA1	DUF3835 domain-containing protein	na	M. globosa					0		na		na		5	56.66	R1CVK1	BTB domain-containing protein	GO:0051260	Emiliania huxleyi	0	0	0	0	0	0	14	0		0	0	0	0	0
	OG0011800	CCF53412.1	uncharacterized protein UHOR_15968	Haloacid Dehalogenase-like Hydrolases; cl21460, Superfamily of activating enzymes (E1) of the ubiquitin-like proteins. This family includes classical ubiquitin-activating enzymes E1, ubiquitin-like (ubl) activating enzymes and other mechanistic homologes, like MoeB, Thif1 and others. The common...; cl22428	I2G2L9	Uncharacterized protein	na	U. hordei					39	64.19	D0NRI1	PX domain-containing protein	GO:0035091	Phytophthora infestans	16	65.75	H3GN57	PX domain-containing protein	GO:0046872 GO:0035091	Phytophthora ramorum	0	0	0	0	0	0	14	0		0	0	0	0	0
	OG0011801	CCF48428.1	uncharacterized protein UHOR_08961		I2FND5	Uncharacterized protein	na	U. hordei					14		na		na		1		na		na		0	0	0	0	2	0	14	0		0	0	0	0	0
	OG0012263	XP_014654378.1	conserved hypothetical protein	DNA polymerase III subunits gamma and tau; Validated	A0A081CL90	Uncharacterized protein	na	M. antarcticus					2	42.81	W3VFP5	Altered inheritance of mitochondria protein 21	na	Moesziomyces aphidis	5	44.31	A0A4S2JWT2	L27 domain-containing protein	GO:0030054	Temnothorax longispinosus	0	0	0	0	0	0	15	0		0	0	0	0	0
	OG0012264	XP_001730691.1	hypothetical protein MGL_2145	polyadenylate binding protein, human types 1, 2, 3, 4 family; TIGR01628	A8Q260	Uncharacterized protein	na	M. globosa					293	50.97	A0A0D2F2B7	Hpc2-related domain-containing protein	na	Exophiala xenobiotica	64	55.12	A0A175WB68	Histone promoter control protein 2	na	Madurella mycetomatis	0	0	0	0	0	0	15	0		0	0	0	0	0
	OG0012266	CCF54625.1	uncharacterized protein UHOR_01619		I2G632	Uncharacterized protein	na	U. hordei					21	61.47	A0A316W0K5	Casein kinase substrate phosphoprotein PP28 domain-containing protein	na	Ceraceosorus guamensis	1		na		na		0	0	0	0	0	0	15	0		0	0	0	0	0
	OG0012267	XP_014657720.1	uncharacterized protein PAN0_004c2289		A0A081CBN4	Uncharacterized protein	na	M. antarcticus					15	61.88	A0A4U7KTF3	Histone acetyltransferase	na	Sporisorium graminicola	2	59.88	A0A061H1W5	Histone deacetylase complex subunit SAP30 Sin3 binding domain-containing protein	na	Pseudozyma flocculosa	0	0	0	0	0	0	15	0		0	0	0	0	0
	OG0012268	CCF53578.1	uncharacterized protein UHOR_02463	MAEBL; Provisional	I2G335	Uncharacterized protein	na	U. hordei					11	58.41	M9M6W3	Predicted unusual protein kinase	GO:0016301 GO:0016310	Pseudozyma antarctica	7	61.31	A0A2N8U9M5	DNA replication checkpoint mediator MRC1 domain-containing protein	na	Sporisorium reilianum f. sp. reilianum	0	0	0	0	0	0	15	0		0	0	0	0	0
	OG0012269	CCF53672.1	uncharacterized protein UHOR_02263	prolipoprotein diacylglyceryl transferase; Reviewed, pfam00439, acetyllysine binding site [active]	I2G3C9	Bromo domain-containing protein	na	U. hordei					46	53.5	A0A061D9W1	PHD FINGER PROTEIN, putative	GO:0000123 GO:0046872 GO:0006357	Babesia bigemina	40	51.78	A0A669PRQ9	Ubinuclein 1	GO:0005634	Phasianus colchicus	0	0	0	0	0	0	15	0		0	0	0	0	0
	OG0012270	XP_014654565.1	uncharacterized protein PAN0_017d5505	large tegument protein UL36; Provisional	A0A081CKT2	Uncharacterized protein	GO:0016020	M. antarcticus																	0	0	0	0	0	0	15	0		0	0	0	0	0
	OG0012271	XP_001731856.1	hypothetical protein MGL_1124	M23 family metallopeptidase, also known as beta-lytic metallopeptidase, and similar proteins; cd12797	A8PWJ7	Uncharacterized protein	na	M. globosa					1		na		na		1		na		na		0	0	0	0	0	0	15	0		0	0	0	0	0
	OG0012272	XP_001731939.1	hypothetical protein MGL_1207	DNA polymerase III subunit gamma/tau	A8PWT1	Uncharacterized protein	na	M. globosa					1		na		na		7	48.88	A0A7J7EM36	WH2 domain-containing protein	GO:0005884 GO:0044295 GO:0044294 GO:0043025 GO:0048471 GO:0005886 GO:0001726 GO:1990357 GO:0003785 GO:0051639 GO:0030041	Diceros bicornis minor	0	0	0	0	0	0	15	0		0	0	0	0	0
	OG0012273	XP_014655052.1	uncharacterized protein PAN0_014d4860	Putative adhesin; pfam13349	A0A081CIZ1	Adhesin domain-containing protein	na	M. antarcticus					21	77	A0A317XF78	Adhesin domain-containing protein	GO:0016020	Testicularia cyperi	14	77.38	A0A316V814	Uncharacterized protein	GO:0016020	Meira miltonrushii	0	0	0	0	0	0	15	0		0	0	0	0	0
	OG0012275	CCF49962.1	uncharacterized protein UHOR_00820		Q2A750	Uncharacterized protein	GO:0016020	U. hordei																	0	0	0	0	0	0	15	0		0	0	0	0	0
	OG0012276	XP_001729684.1	hypothetical protein MGL_3228	probable pectinesterase/pectinesterase inhibitor	A8Q893	DUF1746 domain-containing protein	GO:0016020	M. globosa																	0	0	0	0	0	0	15	0		0	0	0	0	0
	OG0012758	XP_001730128.1	uncharacterized protein MGL_2510		A8Q485	Uncharacterized protein	na	M. globosa					12	48.91	A0A0L0V2N4	BHLH domain-containing protein	GO:0000981 GO:0046983 GO:0000978	Puccinia striiformis f. sp. tritici	13	53.44	A0A1E3QVX4	BHLH domain-containing protein	GO:0000981 GO:0046983 GO:0000978	Babjeviella inositovora	0	0	0	0	0	0	14	0		0	0	0	0	0
	OG0012759	CCF49827.1	uncharacterized protein UHOR_08176		I2FSD4	Uncharacterized protein	na	U. hordei					89	68.94	A0A024GU66	Signal recognition particle subunit SRP72	GO:0005783 GO:0005786 GO:0008312 GO:0043022 GO:0006614	Albugo candida	103	72.81	V9KFA7	Cingulin	GO:0005923 GO:0016459 GO:0008017 GO:0000226	Callorhinchus milii	0	0	0	0	0	0	14	0		0	0	0	0	0
	OG0012760	CCF53686.1	uncharacterized protein UHOR_02283	WTAP/Mum2p family; pfam17098	I2G3E3	Uncharacterized protein	GO:0005634 GO:0080009 GO:0000381	U. hordei																	0	0	0	0	0	0	14	0		0	0	0	0	0
	OG0012764	XP_001729928.1	uncharacterized protein MGL_2914		A8Q6B8	Uncharacterized protein	GO:0016020	M. globosa																	0	0	0	0	0	0	14	0		0	0	0	0	0
	OG0012765	XP_014656985.1	uncharacterized protein PAN0_006d2856	MAEBL; Provisional	A0A081CD96	Uncharacterized protein	na	M. antarcticus					0		na		na		4	59.44	A0A7J7ZNE0	Mitochondrial import receptor subunit TOM22 homolog	GO:0005741 GO:0006886	Pipistrellus kuhlii	0	0	0	0	0	0	14	0		0	0	0	0	0
	OG0012766	CCF53728.1	uncharacterized protein UHOR_00013	vicinal oxygen chelate (VOC) family; cl14632	I2G3I5	VOC domain-containing protein	na	U. hordei					15	68.94	A0A2H4SGS1	Glyoxalase bleomycin resistance dioxygenase	GO:0051213 GO:0004462 GO:0046872	Cordyceps militaris	5	71.75	G3J385	Glyoxalase/bleomycin resistance protein/dioxygenase	GO:0051213 GO:0004462 GO:0046872	Cordyceps militaris	0	0	0	0	0	0	14	0		0	0	0	0	0
	OG0012767	CCF51970.1	uncharacterized protein UHOR_05081		I2FYH7	Mediator of RNA polymerase II transcription subunit 8	na	U. hordei					16	71.69	A0A5C3E9X5	Mediator of RNA polymerase II transcription subunit 8	na	Ustilago trichophora	7	72.25	A0A5C3E8F0	Mediator of RNA polymerase II transcription subunit 8	na	Ustilago trichophora	0	0	0	0	0	0	14	0		0	0	0	0	0
	OG0012768	XP_014654421.1	uncharacterized protein PAN0_018d5707		A0A081CLD3	Uncharacterized protein	GO:0016020	M. antarcticus																	0	0	0	0	0	0	14	0		0	0	0	0	0
	OG0012770	XP_001728731.1	uncharacterized protein MGL_4066		A8QCZ8	FLZ-type domain-containing protein	na	M. globosa					0		na		na		4	43.81	A0A2C9WH48	SAWADEE domain-containing protein	na	Manihot esculenta	0	0	0	0	0	0	14	0		0	0	0	0	0
	OG0012771	CCF48022.1	uncharacterized protein UHOR_04013	Alpha and gamma adaptin binding protein p34; pfam10199	I2FM79	Uncharacterized protein	na	U. hordei					4		na		na		6		na		na		0	0	0	0	0	0	14	0		0	0	0	0	0
	OG0012772	CCF52627.1	uncharacterized protein UHOR_04758		I2G0D4	Uncharacterized protein	na	U. hordei					12		na		na		7		na		na		0	0	0	0	0	0	14	0		0	0	0	0	0
	OG0012774	CCF49260.1	uncharacterized protein UHOR_07667		I2FQR7	F-box domain-containing protein	na	U. hordei					0		na		na		1		na		na		0	0	0	0	0	0	14	0		0	0	0	0	0
	OG0012775	CCF52457.1	uncharacterized protein UHOR_04539	Kinetochore protein Mis14 like; pfam08641	I2FZW4	Uncharacterized protein	GO:0000776 GO:0000070	U. hordei																	0	0	0	0	0	0	14	0		0	0	0	0	0
	OG0012782	CCF47933.1	uncharacterized protein UHOR_00928		I2FLZ0	Rho termination factor N-terminal domain-containing protein	na	U. hordei					11	49.16	M9LP61	Translation initiation factor 2, beta subunit	GO:0003743	Pseudozyma antarctica	9	67.31	A0A0M9VSE5	Uncharacterized protein	GO:0005743	Escovopsis weberi	0	0	0	0	0	0	14	0		0	0	0	0	0
	OG0011803	CCF50972.1	uncharacterized protein UHOR_06882		I2FVM9	DNA replication regulator Sld3 C-terminal domain-containing protein	na	U. hordei					28	57.28	A0A1A5ZW81	DNA replication regulator Sld3 C-terminal domain-containing protein	GO:0031261 GO:0006270	Kwoniella dejecticola	32	65.94	A0A1Y2BM47	DNA replication regulator Sld3 C-terminal domain-containing protein	GO:0031261 GO:0006270	Naematelia encephala	0	0	0	2	0	0	14	0		0	0	0	0	0
	OG0011802	CCF50139.1	uncharacterized protein UHOR_07126		I2FT96	F-box domain-containing protein	na	U. hordei					656	90.85	Q9SAC4	F-box protein At1g10780	GO:0009506	Arabidopsis thaliana	455	91.62	A0A0C1JJR1	F-box/LRR-repeat protein 14	GO:0019005 GO:0031146	Candidatus Protochlamydia amoebophila	0	0	0	1	0	0	15	0		0	0	0	0	0
absent	OG0002951	NP_015114.2	signal recognition particle subunit SRP72		P38688	Signal recognition particle subunit SRP72	GO:0005789 GO:0005730 GO:0005786 GO:0008312 GO:0043022 GO:0006614 GO:0006617	S. cerevisiae																	72	54	11	69	2	17	0	17		1	1	1	1	1
	OG0002961	NP_014172.1	YNL227C JJJ1		P53863	J protein JJJ1	GO:0005737 GO:0005829 GO:0005739 GO:0005730 GO:0001671 GO:0008270 GO:0006897 GO:0008361 GO:0042273 GO:0000055 GO:0006364	S. cerevisiae																	72	54	11	70	2	16	1	15		1	1	1	1	1
	OG0002060	NP_013525.3	proteasome regulatory particle lid subunit RPN13	Proteasome complex subunit Rpn13 ubiquitin receptor; pfam04683	O13563	26S proteasome regulatory subunit RPN13	GO:0005634 GO:0000502 GO:0008541 GO:0034515 GO:0061133 GO:0070628 GO:0043130 GO:0043161 GO:0006511	S. cerevisiae																	72	54	11	69	2	17	0	14		1	1	1	1	1
	OG0002672	NP_014503.2	Rtc1p	WD40 domain, found in a number of eukaryotic proteins that cover a wide variety of functions including adaptor/regulatory modules in signal transduction, pre-mRNA processing and cytoskeleton assembly; typically contains a GH dipeptide 11-24 residues from...; cl29593, Modified RING finger, H2 subclass (C3H3C2-type), found in WD repeat-containing protein mio and its homologs; cd16488	Q08281	Restriction of telomere capping protein 1	GO:0005829 GO:0000324 GO:0061700 GO:0035859 GO:0005774 GO:0046872 GO:0034198 GO:0016239 GO:1904263 GO:0015031 GO:1903432	S. cerevisiae																	68	54	10	69	0	16	0	14		1	1	1	0	1
	OG0002867	NP_594334.2	cytidylyltransferase (predicted)		Q10350	Uncharacterized protein C1F12.08	GO:0005829 GO:0005634 GO:0004140 GO:0015937	S. pombe																	70	54	11	68	2	17	1	14		1	1	1	1	1
	OG0002507	NP_011354.3	Yip5p	Protein that interacts with Rab GTPases; localized to late Golgi vesicles; computational analysis of large-scale protein-protein interaction data suggests a possible role in vesicle-mediated transport	P53108	Protein YIP5	GO:0005794 GO:0016020 GO:0031267 GO:0016192	S. cerevisiae																	71	51	10	70	0	17	0	13		1	1	1	1	1
	OG0003141	NP_010369.3	Tvp23p	Eukaryotic protein of unknown function (DUF846); pfam05832	P38962	Golgi apparatus membrane protein TVP23	GO:0005737 GO:0000139 GO:0009306 GO:0016192	S. cerevisiae																	69	51	10	67	0	17	0	13		1	1	1	1	1
	OG0003176	NP_013763.1	Csm3p	Replication Fork Protection Component Swi3; pfam07962	Q04659	Chromosome segregation in meiosis protein 3	GO:0005737 GO:0043596 GO:0005634 GO:0031298 GO:0003677 GO:0006281 GO:0000076 GO:0034087 GO:0043570 GO:0045132 GO:0007064 GO:0043111 GO:0031297	S. cerevisiae																	71	53	10	69	2	17	0	13		1	1	1	1	1
	OG0003260	NP_010750.1	mitochondrial 54S ribosomal protein YmL28	Mitochondrial ribosomal protein L28; pfam09812	P36527	Large ribosomal subunit protein mL40	GO:0005743 GO:0005762 GO:0005739 GO:0003735 GO:0032543	S. cerevisiae																	69	54	10	71	2	16	0	12		0	0	0	0	0
na, not available.
1, M. antarcticus, Moesziomyces antarcticus; M. globosa, Malassezia globosa; S. cerevisiae, Saccharomyces cerevisiae; S. pombe, Schizosaccharomyces pombe; U. hordei, Ustilago hordei.
	present in >90% species
	present in >60% and <=90 species
	present in >30% and <=60 species
	present in model organism

## Sheet: S5g
Supplementary Table 5g. OGs that characterise Ascomycota (characteristically present OGs).
OG ID	Genbank			UniProt				Model organism				Alphafold												Pezizomycotina (72)	Saccharomycotina (54)	Taphrinomycotina (11)	Agaricomycotina (71)	Wallemiomycotina (2)	Pucciniomycotina (17)	Ustilaginomycotina (15)	early-diverging lineages (17)		Drosophila melanogaster	Dictyostelium discoideum	Homo sapiens	Arabidopsis thaliana	Caenorhabditis elegans
												AFDB50/MMseqs2						AFDB/Foldseek
	representative protein ID	gene description in a reference genome		ID	protein name	GO	Reference genome used1	ID	protein name	GO	reference genome used	# of accessions found	Average pLDDT	UniProt ID	protein name	GO	reference genome used	# of accessions found	Average pLDDT	UniProt ID	protein name	GO	reference genome used
OG0004124	NP_015316.1	YPL009C RQC2	Ribosome quality control complex subunit 2	Q12532	Ribosome quality control complex subunit 2	GO:0005737 GO:0010494 GO:0022626 GO:1990112 GO:1904678 GO:0003729 GO:0043023 GO:0000049 GO:0140708 GO:0043043 GO:0072344 GO:1990116	S. cerevisiae																	71	54	11	0	0	0	0	16		1	1	1	1	1
OG0004054	NP_594394.1	ubiquitin-protein ligase E3		O14099	Uncharacterized RING finger protein C2F3.16	GO:0005634 GO:0061630 GO:0008270 GO:0043161 GO:0016567 GO:0006511	S. pombe																	72	49	7	1	0	0	0	16		1	1	1	1	0
OG0004098	NP_013787.1	YMR071C TVP18	Golgi apparatus membrane protein TVP18	Q04767	Golgi apparatus membrane protein TVP18	GO:0000139 GO:0016192	S. cerevisiae																	70	53	10	0	0	0	0	15		0	0	0	0	0
OG0003998	NP_012746.1	YKL175W ZRT3	Zinc-regulated transporter 3	P34240	Zinc-regulated transporter 3	GO:0005783 GO:0000329 GO:0005385 GO:0006882 GO:0071577 GO:0006829	S. cerevisiae																	69	54	8	0	0	0	0	15		1	1	1	1	1
OG0004067	NP_011724.1	YGR208W SER2	Phosphoserine phosphatase	P42941	Phosphoserine phosphatase	GO:0005737 GO:0005634 GO:0036424 GO:0000287 GO:0016311 GO:0006564	S. cerevisiae																	71	54	9	0	0	0	0	14		1	1	1	1	1
OG0004229	NP_588183.1	LMBR1-like membrane protein		O94599	LIMR family protein	GO:0005737 GO:0005794 GO:0000139 GO:0016020 GO:0005886	S. pombe																	71	50	7	0	0	0	0	14		1	1	1	1	1
OG0004129	NP_014848.1	YOR205C GEP3	ribosome biogenesis GTPase YqeH	Q08622	Genetic interactor of prohibitins 3, mitochondrial	GO:0005743 GO:0005739 GO:0005525 GO:0030490	S. cerevisiae																	71	46	9	0	0	0	0	14		1	1	1	1	1
OG0003989	NP_015012.3	YOR367W SCP1	Calponin [Cytoskeleton]	Q08873	Transgelin	GO:0030479 GO:0015629 GO:0051015 GO:0030674 GO:0007015	S. cerevisiae																	71	43	10	0	0	0	0	14		1	1	1	0	1
OG0004146	NP_010983.2	YER061C CEM1	3-oxoacyl-[acyl-carrier-protein] synthase homolog	P39525	3-oxoacyl-[acyl-carrier-protein] synthase homolog	GO:0005829 GO:0005739 GO:0004315 GO:0006633	S. cerevisiae																	71	54	10	0	0	0	0	13		1	1	1	1	1
OG0004324	NP_116701.3	YFR043C IRC6	Clathrin-mediated vesicle trafficking	P43615	Increased recombination centers protein 6	GO:0030674 GO:0016192	S. cerevisiae																	70	50	8	0	0	0	0	13		1	1	1	1	0
OG0004202	NP_015152.1	YPL173W MRPL40	39S ribosomal protein L40, mitochondrial	P36534	Large ribosomal subunit protein uL24m	GO:0005743 GO:0005762 GO:0005739 GO:0003735 GO:0032543 GO:0006412	S. cerevisiae																	71	53	11	0	0	0	0	13		1	1	1	1	1
OG0004237	NP_010313.3	YDR030C RAD28	Radiation-sensitive protein 28	Q12021	Radiation-sensitive protein 28	GO:0031464 GO:0000109 GO:0005634 GO:0006281 GO:0043161 GO:0000209 GO:0006283	S. cerevisiae																	68	50	10	0	0	0	0	13		0	1	1	1	1
OG0004250	NP_012674.1	YJR140C HIR3	Histone transcription regulator 3	P47171	Histone transcription regulator 3	GO:0005694 GO:0000417 GO:0005634 GO:0003714 GO:0006325 GO:1905268 GO:0000122 GO:0006334 GO:0006368	S. cerevisiae																	72	54	11	0	0	0	0	12		0	0	0	0	0
OG0004278	NP_013593.1	YML114C TAF8	Transcription initiation factor TFIID subunit 8	Q03750	Transcription initiation factor TFIID subunit 8	GO:0005634 GO:0005669 GO:0045944 GO:0006366	S. cerevisiae																	72	52	10	0	0	0	0	12		1	1	1	1	0
OG0004325	NP_011977.1	YHR109W CTM1	Cytochrome c lysine N-methyltransferase 1	P38818	Cytochrome c lysine N-methyltransferase 1	GO:0005829 GO:0000277 GO:0016279 GO:0018022	S. cerevisiae																	72	52	6	0	0	0	0	12		0	0	0	0	0
OG0004200	NP_011833.1	YHL030W ECM29	Proteasome component ECM29	P38737	Proteasome component ECM29	GO:0005737 GO:0005634 GO:0000502 GO:0060090 GO:0043248 GO:0030433	S. cerevisiae																	71	53	10	0	0	0	0	12		1	1	1	1	1
OG0004296	NP_010939.1	YER022W SRB4	Mediator of RNA polymerase II transcription subunit 17	P32569	Mediator of RNA polymerase II transcription subunit 17	GO:0070847 GO:0016592 GO:0005634 GO:0140297 GO:0001139 GO:0000979 GO:0003712 GO:0045944 GO:0032968 GO:0060261 GO:0006357 GO:0051123 GO:0006367	S. cerevisiae																	70	53	11	0	0	0	0	12		0	0	0	1	0
OG0004268	NP_013486.3	YLR382C NAM2	Leucine--tRNA ligase, mitochondrial	P11325	Leucine--tRNA ligase, mitochondrial	GO:0005759 GO:0005739 GO:0002161 GO:0005524 GO:0004823 GO:0097157 GO:0000372 GO:0006429 GO:0032543 GO:0006397	S. cerevisiae																	70	53	9	0	0	0	0	12		1	1	1	1	1
OG0003622	NP_014276.1	YNL123W NMA111	Pro-apoptotic serine protease NMA111	P53920	Pro-apoptotic serine protease NMA111	GO:0005634 GO:0004252 GO:0008236 GO:0006915 GO:0044255 GO:0034605 GO:0030163 GO:0120174	S. cerevisiae																	72	52	9	0	0	0	0	12		0	0	0	1	0
OG0004238	NP_014844.3	YOR201C MRM1	Ribose methyltransferase; modifies a functionally critical_ conserved nucleotide in mitochondrial 21S rRNA	P25270	rRNA methyltransferase 1, mitochondrial	GO:0005739 GO:0003723 GO:0016435 GO:0008989 GO:0000154	S. cerevisiae																	71	49	10	0	0	0	0	12		0	1	1	1	1
OG0004411	NP_013990.1	YMR263W SAP30	Transcriptional regulatory protein SAP30	P38429	Transcriptional regulatory protein SAP30	GO:0000118 GO:0005634 GO:0033698 GO:0070210 GO:0003712 GO:0003714 GO:0061188 GO:0061186 GO:0016479 GO:0006334 GO:2000219 GO:0045944 GO:0006355 GO:0006357	S. cerevisiae																	67	52	7	0	0	0	0	12		0	1	0	0	0
OG0004432	NP_010488.1	YDR202C RAV2	Rogdi leucine zipper containing protein	Q03956	Regulator of V-ATPase in vacuolar membrane protein 2	GO:0031901 GO:0012505 GO:0043291 GO:0015031 GO:0043254 GO:0007035 GO:0070072	S. cerevisiae																	66	48	10	0	0	0	0	12		1	0	1	0	1
OG0004290	NP_012215.1	YIL049W DFG10	putative polyprenol reductase	P40526	Polyprenal reductase	GO:0005783 GO:0005789 GO:0003865 GO:0160198 GO:0102389 GO:0019408 GO:0019348 GO:0006488 GO:0016095 GO:0007124	S. cerevisiae																	67	48	9	0	0	0	0	12		1	1	1	1	1
OG0004114	NP_014856.1	YOR213C SAS5	Something about silencing protein 5	Q99314	Something about silencing protein 5	GO:0000785 GO:0000781 GO:0031011 GO:0033255 GO:0016514 GO:0005669 GO:0005674 GO:0016407 GO:0004402 GO:0042393 GO:0006338 GO:0006357 GO:0031509	S. cerevisiae																	71	53	11	0	0	0	0	11		0	0	0	0	0
OG0004347	NP_014761.1	YOR118W RTC5	Restriction of telomere capping protein 5	Q12108	Restriction of telomere capping protein 5	GO:0005737	S. cerevisiae																	69	52	5	0	0	0	0	11		0	0	0	0	0
OG0003999	NP_009368.2	YAL034C FUN19	SWIRM domain-containing protein FUN19	P28003	SWIRM domain-containing protein FUN19	GO:1990483 GO:0005634 GO:0070210 GO:0003682 GO:0003713 GO:0006338 GO:0006357	S. cerevisiae																	67	54	11	0	0	0	0	11		0	0	0	0	0
OG0004279	NP_683715.1	YFL023W BUD27	Bud site selection protein 27	P43573	Bud site selection protein 27	GO:0005737 GO:0016272 GO:0051082 GO:0001731 GO:0006457 GO:1990113 GO:1990114 GO:1990115	S. cerevisiae																	71	52	10	0	0	0	0	11		1	1	1	0	0
OG0004267	NP_009871.2	YCL061C MRC1	Mediator of replication checkpoint protein 1	P25588	Mediator of replication checkpoint protein 1	GO:0000781 GO:0034399 GO:0043596 GO:0005634 GO:0031298 GO:0010997 GO:0006281 GO:0006260 GO:0000076 GO:0043570 GO:0033314 GO:0007095 GO:0031573 GO:0007064 GO:0033262 GO:0030466 GO:0031509 GO:0000723	S. cerevisiae																	72	53	11	0	0	0	0	11		0	0	0	0	0
OG0004159	NP_012025.1	YHR155W YSP1	Membrane-anchored lipid-binding protein LAM1	P38851	Membrane-anchored lipid-binding protein LAM1	GO:0032541 GO:0005829 GO:0005783 GO:0005789 GO:0031966 GO:0005739 GO:0005886 GO:0015248 GO:0032366	S. cerevisiae																	72	53	7	0	0	0	0	10		0	0	1	0	0
OG0004311	NP_013889.1	YMR166C MME1	Mitochondrial magnesium exporter 1	Q03829	Mitochondrial magnesium exporter 1	GO:0005743 GO:0015095 GO:1990616 GO:0015693	S. cerevisiae																	71	53	8	0	0	0	0	10		0	0	0	0	0
OG0004162	NP_014750.3	YOR107W RGS2	Regulator of G-protein signaling 2	Q99188	Regulator of G-protein signaling 2	GO:0005737 GO:0005634 GO:0005096 GO:0007188	S. cerevisiae																	71	50	4	0	0	0	0	10		0	0	0	0	0
OG0004320	NP_011571.4	YGR057C LST7	Vesicle coat protein involved in Golgi to plasma membrane transport	P53237	Protein LST7	GO:0005737 GO:0005829 GO:1990877 GO:0005774 GO:0005096 GO:0071230 GO:1904263	S. cerevisiae																	68	48	9	0	0	0	0	10		1	1	1	0	1
OG0004413	NP_013952.1	YMR225C MRPL44	mitochondrial 54S ribosomal protein YmL44	P19956	Large ribosomal subunit protein mL53	GO:0005743 GO:0005762 GO:0005739 GO:0003735 GO:0032543	S. cerevisiae																	67	51	7	0	2	0	0	10		1	0	1	1	1
OG0004225	NP_116692.1	YFR034C PHO4	Phosphate system positive regulatory protein PHO4	P07270	Phosphate system positive regulatory protein PHO4	GO:0005737 GO:0005634 GO:0003700 GO:0046983 GO:0043565 GO:0016036 GO:0006338 GO:0045937 GO:0045944	S. cerevisiae																	72	53	2	0	0	0	0	9		0	0	0	0	0
OG0003643	NP_013667.1	YML046W PRP39	Pre-mRNA-processing factor 39	P39682	Pre-mRNA-processing factor 39	GO:0000243 GO:0005634 GO:0005681 GO:0005685 GO:0071004 GO:0000395 GO:0000398	S. cerevisiae																	72	54	9	0	0	0	0	9		1	1	1	1	1
OG0004407	NP_010602.3	YDR316W OMS1	Methyltransferase OMS1, mitochondrial	Q06668	Methyltransferase OMS1, mitochondrial	GO:0005740 GO:0005743 GO:0005739 GO:0008168 GO:0008757 GO:0032259	S. cerevisiae																	70	54	7	0	0	0	0	9		0	0	0	0	0
OG0004219	NP_010622.1	YDR335W MSN5	Protein MSN5	P52918	Protein MSN5	GO:0005737 GO:0005634 GO:0042565 GO:0005049 GO:0003723 GO:0006611 GO:0006405 GO:0071528	S. cerevisiae																	71	54	11	0	0	0	0	9		1	1	1	1	0
OG0004455	NP_014798.3	YOR155C ISN1	IMP-specific 5'-nucleotidase 1	Q99312	IMP-specific 5'-nucleotidase 1	GO:0005524 GO:0050483 GO:0000287 GO:0006190 GO:0071590 GO:0071592 GO:0009117	S. cerevisiae																	71	50	7	0	0	0	0	9		0	0	0	0	0
OG0004382	NP_011726.1	YGR210C	Uncharacterized GTP-binding protein YGR210C	P42942	Uncharacterized GTP-binding protein YGR210C	GO:0005737 GO:0016887 GO:0005525	S. cerevisiae																	70	54	7	0	0	0	0	9		0	1	0	0	0
OG0004143	NP_015134.1	YPL190C NAB3	RNA recognition motif (RRM) found in yeast nuclear polyadenylated RNA-binding protein 3 (Nab3p) and similar proteins	P38996	Nuclear polyadenylated RNA-binding protein 3	GO:0005737 GO:0035649 GO:0005654 GO:0005634 GO:0003729 GO:0003723 GO:0001068 GO:0071041 GO:0071034 GO:0031124 GO:0071028 GO:0031126 GO:0034472 GO:0030847 GO:0042780	S. cerevisiae																	71	49	10	2	0	0	0	9		1	1	1	0	1
OG0004216	NP_010166.1	YDL117W CYK3	Cytokinesis protein 3, contains TGc (transglutaminase/protease-like) domain	Q07533	Cytokinesis protein 3	GO:0005935 GO:0000142 GO:0005737 GO:0044697 GO:0016020 GO:0110085 GO:0005634 GO:0030234 GO:1902410 GO:0140278 GO:1990344	S. cerevisiae																	72	52	6	1	0	0	0	9		1	0	0	0	0
OG0004431	NP_012646.3	YJR112W NNF1	MIND complex subunit NNF1	P47149	Kinetochore-associated protein NNF1	GO:0000776 GO:0000444 GO:0005634 GO:0000940 GO:0000922 GO:0008608 GO:0051301 GO:0007059	S. cerevisiae																	64	49	10	2	2	0	0	9		0	1	1	1	0
OG0003786	NP_010077.1	YDL204W RTN2	Reticulon-like protein 2	Q12443	Reticulon-like protein 2	GO:0071944 GO:0032541 GO:0005737 GO:0005783 GO:0005789 GO:0071782 GO:0005634 GO:0048309 GO:0071788 GO:0071786 GO:0032581 GO:0034976	S. cerevisiae																	72	54	10	0	0	0	0	8		1	1	1	1	1
OG0002321	NP_009634.2	YBR078W ECM33	Cell wall protein ECM33	P38248	Cell wall protein ECM33	GO:0005783 GO:0005576 GO:0009277 GO:0005739 GO:0005886 GO:0098552 GO:0031505	S. cerevisiae																	71	54	11	0	0	0	0	8		0	0	0	0	1
OG0004060	NP_014344.3	YNL054W VAC7	Vacuolar segregation protein 7	P53950	Vacuolar segregation protein 7	GO:0005737 GO:0000329 GO:0016020 GO:0070772 GO:0005774 GO:0008047 GO:1903100 GO:0010513 GO:1903778 GO:0010511 GO:0000011	S. cerevisiae																	71	52	10	0	0	0	0	8		0	0	0	0	0
OG0003819	NP_011620.1	YGR106C VOA1	V0 complex accessory subunit Ac45/VOA1	P53262	V0 assembly protein 1	GO:0005789 GO:0000329 GO:0000139 GO:0033176 GO:0016471 GO:0000220 GO:0046961 GO:0048388 GO:0061795 GO:0065003 GO:1902600 GO:0007035	S. cerevisiae																	71	54	10	2	0	0	0	8		0	0	0	0	0
OG0004380	NP_013712.1	YML002W VRL1	Putative protein of unknown function; expression induced by heat and by calcium shortage	P0CF17	UPF0507 protein YML002W	GO:0005769 GO:0005770 GO:0005886 GO:0030133 GO:0097422 GO:0005085 GO:0000149 GO:0045022	S. cerevisiae																	72	49	8	0	0	0	0	7		0	0	0	0	0
OG0004176	NP_013274.1	YLR173W		Q06247	Putative uncharacterized protein YLR173W	GO:0000329 GO:0016020 GO:0006995 GO:0016242 GO:0034497	S. cerevisiae																	69	53	6	1	0	0	0	7		0	0	0	0	0
OG0004345	NP_012001.1	YHR133C NSG1	Protein NSG1	J6EM76	NSG1-like protein	GO:0005789	S. cerevisiae																	71	51	8	0	0	0	0	6		0	0	1	1	0
OG0004113	NP_010575.1	YDR289C RTT103	Regulator of Ty1 transposition protein 103	Q05543	Regulator of Ty1 transposition protein 103	GO:0000785 GO:0005634 GO:0035861 GO:0003677 GO:1990269 GO:0000993 GO:0031124 GO:0010526	S. cerevisiae																	71	53	11	0	0	0	0	6		1	1	1	1	1
OG0004399	NP_012245.1	YIL019W FAF1	Protein FAF1	P40546	Protein FAF1	GO:0005737 GO:0005730 GO:0005634 GO:0000462	S. cerevisiae																	72	53	11	0	0	0	0	5		0	0	0	0	0
OG0004362	NP_012182.1	YIL084C SDS3	Transcriptional regulatory protein SDS3	P40505	Transcriptional regulatory protein SDS3	GO:0005829 GO:0005634 GO:0033698 GO:0070210 GO:0070822 GO:0042826 GO:0043709 GO:0031507 GO:0061188 GO:0061186 GO:0000122 GO:0006334 GO:0045944 GO:2000217 GO:0006357	S. cerevisiae																	71	53	10	0	0	0	0	5		0	0	1	0	0
OG0004563	XP_459737.2	Nuclear cap-binding protein subunit 3		Q6BPY3	DEHA2E09900p	GO:0005634 GO:0003729 GO:0000340	D. hansenii																	68	47	9	0	0	0	0	5		0	0	1	0	0
OG0004451	NP_009653.2	YBR095C RXT2	Component of the histone deacetylase Rpd3L complex; possibly involved in cell fusion and invasive growth; relocalizes to the cytosol in response to hypoxia	P38255	Transcriptional regulatory protein RXT2	GO:1990483 GO:0005829 GO:0005634 GO:0033698 GO:0070210 GO:0000747 GO:0001403 GO:0061188 GO:0061186 GO:0000122 GO:0006334 GO:2000219 GO:0006357	S. cerevisiae																	69	54	11	0	0	0	0	4		0	0	0	0	0
OG0004453	NP_012225.1	YIL039W TED1	Protein TED1	P40533	Protein TED1	GO:0005783 GO:0005789 GO:0016787 GO:0006888 GO:0006506	S. cerevisiae																	69	53	7	0	0	0	0	4		0	1	0	0	0
OG0001218	NP_012143.2	YIL123W SIM1		P40472	Probable secreted beta-glucosidase SIM1	GO:0009986 GO:0005783 GO:0005576 GO:0009277 GO:0016798 GO:0031505 GO:0000272	S. cerevisiae																	70	54	11	1	0	0	0	3		0	0	0	0	0
OG0004524	NP_012265.3	YIL001W	Ankyrin repeat [Signal transduction mechanisms]	P40560	Ankyrin repeat-containing protein YIL001W	GO:0005737 GO:0000151	S. cerevisiae																	70	46	7	1	0	0	0	3		0	0	1	1	0
OG0001084	NP_013518.3	YLR414C PUN1	Protein PUN1	Q06991	Protein PUN1	GO:0051285 GO:0071944 GO:0005933 GO:0005737 GO:0005783 GO:0005886 GO:0031505	S. cerevisiae																	72	51	10	0	0	0	0	1		0	0	0	0	0
OG0004511	NP_116656.1	YFR001W LOC1	60S ribosomal subunit assembly/export protein LOC1	P43586	60S ribosomal subunit assembly/export protein LOC1	GO:0005737 GO:0005730 GO:0005634 GO:0030687 GO:0101031 GO:0042802 GO:0003729 GO:0000480 GO:0000447 GO:0000472 GO:0008298 GO:0051028 GO:0017148 GO:0042273 GO:0000055	S. cerevisiae																	71	53	10	0	0	0	0	1		0	0	0	0	0
OG0004076	NP_010174.1	YDL109C YDL109C	Putative lipase YDL109C	Q12103	Putative lipase YDL109C	GO:0047372 GO:0044255 GO:0016042	S. cerevisiae																	70	53	11	0	0	0	0	1		0	0	0	0	0
OG0004509	NP_011402.3	YGL113W SLD3	DNA replication regulator SLD3	P53135	DNA replication regulator SLD3	GO:0000785 GO:0000775 GO:0031261 GO:0005634 GO:0003682 GO:0006270 GO:0006268 GO:0000727 GO:0033314 GO:1903466	S. cerevisiae																	72	51	10	0	0	0	0	1		0	0	0	0	0
OG0004468	NP_012575.3	YJR041C URB2	Nucleolar pre-ribosomal-associated protein 2	P47108	Nucleolar pre-ribosomal-associated protein 2	GO:0005730 GO:0005634 GO:0042273 GO:0042254 GO:0016072 GO:0006364	S. cerevisiae																	71	53	10	0	0	0	0	1		0	0	1	0	0
OG0004491	NP_010601.3	YDR315C IPK1	Inositol 1_3_4_5_6-pentakisphosphate 2-kinase; nuclear protein required for synthesis of 1_2_3_4_5_6-hexakisphosphate _phytate__ which is integral to cell function; has 2 motifs conserved in other fungi; ipk1 gle1 double mutant is inviable	Q06667	Inositol-pentakisphosphate 2-kinase	GO:0005634 GO:0005524 GO:0035299 GO:0032958 GO:0070481 GO:0016310	S. cerevisiae																	71	49	10	0	0	0	0	1		0	0	0	0	0
OG0004525	NP_015314.1	YPL011C TAF3	Transcription initiation factor TFIID subunit 3	Q12297	Transcription initiation factor TFIID subunit 3	GO:0005634 GO:0005669 GO:0003682 GO:0046982 GO:0045944 GO:0006366	S. cerevisiae																	70	52	10	0	0	0	0	1		0	0	0	1	0
OG0004538	NP_014043.1	YMR312W ELP6	Subunit of hexameric RecA-like ATPase Elp456 Elongator subcomplex; which is required for modification of wobble nucleosides in tRNA; required for Elongator structural integrity	Q04868	Elongator complex protein 6	GO:0005737 GO:0033588 GO:0005654 GO:0042802 GO:0032447 GO:0006357 GO:0006417 GO:0002098	S. cerevisiae																	66	54	11	0	0	0	0	1		0	0	0	0	0
OG0004460	NP_014817.3	YOR174W MED4	Vitamin-D-receptor interacting Mediator subunit 4	Q12343	Mediator of RNA polymerase II transcription subunit 4	GO:0070847 GO:0016592 GO:0005634 GO:0000979 GO:0003712 GO:0034605 GO:0032968 GO:0060261 GO:0006357 GO:0051123 GO:0006366	S. cerevisiae																	71	54	11	1	0	0	0	1		0	0	0	0	0
OG0004598	NP_009752.3	YBR193C MED8	RNA polymerase II mediator complex subunit MED8	P38304	Mediator of RNA polymerase II transcription subunit 8	GO:0070847 GO:0016592 GO:0005634 GO:0030674 GO:0000978 GO:0017025 GO:0003712 GO:0003714 GO:0000122 GO:0045944 GO:0032968 GO:0060261 GO:0006357 GO:0051123	S. cerevisiae																	64	53	11	0	0	0	0	1		0	0	0	0	0
OG0004675	NP_011436.1	YGL079W KXD1		P53158	Biogenesis of lysosome-related organelles complex 1 subunit KXD1	GO:0031083 GO:0005768 GO:0007032 GO:0032880	S. cerevisiae																	70	51	2	1	0	0	0	1		0	0	0	0	0
OG0004711	NP_593104.1	Ino80 complex subunit Ies4		Q9P7S9	INO80 complex subunit 4	GO:0000785 GO:0005829 GO:0031011 GO:0005634 GO:0003677 GO:0006338 GO:0006281 GO:0045815	S. pombe																	69	43	11	0	0	0	0	1		0	0	0	0	0
OG0004635	NP_015091.1	YPL233W NSL1	MIND complex subunit NSL1	Q12143	Kinetochore-associated protein NSL1	GO:0000776 GO:0000444 GO:0005634 GO:0000940 GO:0000922 GO:0008608 GO:0051301 GO:0007059 GO:0000070	S. cerevisiae																	70	45	10	0	1	0	0	1		0	0	0	0	0
OG0004430	NP_009775.3	YBR216C YBP1	YAP1-binding protein 1	P38315	YAP1-binding protein 1	GO:0005737 GO:0034599	S. cerevisiae																	72	53	11	0	0	0	0	0		0	0	0	0	0
OG0004532	NP_009774.4	YBR215W HPC2	Histone promoter control protein 2	Q01448	Histone promoter control protein 2	GO:0005694 GO:0000417 GO:0005634 GO:0006325 GO:1905268 GO:0006334 GO:0006357 GO:0006368	S. cerevisiae																	72	50	11	0	0	0	0	0		0	0	0	0	0
OG0004195	NP_588544.1	protein mug9		O94243	Meiotically up-regulated gene 9 protein	GO:0051321	S. pombe																	71	54	10	0	0	0	0	0		0	0	0	0	0
OG0004233	NP_014967.3	YOR322C LDB19	Alpha-arrestin, Ub-ligase adaptor for Rsp5p; regulates starvation- and substrate-induced Ub-dependent endocytosis of select plasma membrane localized amino acid transporters, recruiting Rsp5p to its targets; role in basal internalization and turnover of Ste2p, mating and zygote formation; recruits Rsp5p to Ste2p via its 2 PPXY motifs; inhibited by Npr1p-mediated phosphorylation, affecting cytosol…	Q12502	Protein LDB19	GO:0005737 GO:0005829 GO:0005794 GO:0000138 GO:0005886 GO:0030674 GO:0031625 GO:0007049 GO:0002092 GO:0070086	S. cerevisiae																	71	53	7	0	0	0	0	0		0	0	0	0	0
OG0004571	NP_009391.2	YAL011W SWC3	SWR1-complex protein 3	P31376	SWR1-complex protein 3	GO:0000785 GO:0005739 GO:0005634 GO:0000812 GO:0140849 GO:0006338 GO:0007029 GO:0006355	S. cerevisiae																	71	52	2	0	0	0	0	0		0	0	0	0	0
OG0004664	NP_012963.3	YKR037C SPC34	Essential subunit of the Dam1 complex _aka DASH complex_; complex couples kinetochores to the force produced by MT depolymerization thereby aiding in chromosome segregation; also localized to nuclear side of spindle pole body	P36131	DASH complex subunit SPC34	GO:0005737 GO:0042729 GO:0072686 GO:0005876 GO:0008608 GO:0051301 GO:1990758 GO:0051987 GO:0031116 GO:1990976	S. cerevisiae																	71	49	5	0	0	0	0	0		0	0	0	0	0
OG0003953	NP_011647.1	YGR131W FHN1	Protein of unknown function; induced by ketoconazole; promoter region contains sterol regulatory element motif, which has been identified as a Upc2p-binding site; overexpression complements function of Nce102p in NCE102 deletion strain; FHN1 has a paralog, NCE102, that arose from the whole genome duplication	P53279	Non-classical export protein 2 homolog 1	GO:0071944 GO:0005886 GO:0070941 GO:0072659 GO:0015031	S. cerevisiae																	70	54	10	0	0	0	0	0		0	0	0	0	0
OG0004094	NP_012614.1	YJR080C AIM24	Altered inheritance of mitochondria protein 24, mitochondrial	P47127	Altered inheritance of mitochondria protein 24, mitochondrial	GO:0005743 GO:0005739 GO:0007007	S. cerevisiae																	70	54	4	0	0	0	0	0		0	0	0	0	0
OG0004501	NP_014347.1	YNL051W COG5	Conserved oligomeric Golgi complex subunit 5	P53951	Conserved oligomeric Golgi complex subunit 5	GO:0005829 GO:0000139 GO:0017119 GO:0042802 GO:0032258 GO:0006891 GO:0015031 GO:0000301	S. cerevisiae																	70	53	11	0	0	0	0	0		0	0	0	0	0
OG0004558	NP_012874.1	YKL050C LPX2	Peroxisomal matrix-localized lipase; target of SCFCdc4 ubiquitin ligase complex; peroxisomal, nuclear and cytosolic localization is dependent on the presence of oleate; transcription is regulated by Azf1p; LPX2 has a paralog, EIS1, that arose from the whole genome duplication	P35736	Uncharacterized protein YKL050C	GO:0070941	S. cerevisiae																	70	53	4	0	0	0	0	0		0	0	0	0	0
OG0004585	NP_010453.1	YDR169C STB3	Ribosomal RNA processing element (RRPE)-binding protein; involved in the glucose-induced transition from quiescence to growth; restricted to nucleus in quiescent cells, released into cytoplasm after glucose repletion; binds Sin3p; relative distribution to the nucleus increases upon DNA replication stress	Q12427	Protein STB3	GO:0005737 GO:0005634 GO:0001228 GO:0043565 GO:0000976 GO:0000432	S. cerevisiae																	70	50	6	0	0	0	0	0		0	0	0	0	0
OG0004015	NP_014105.1	YNL294C RIM21	pH-response regulator protein palH/RIM21	P48565	pH-response regulator protein palH/RIM21	GO:0005783 GO:0005886 GO:0030437 GO:0071469 GO:0071467 GO:0009272 GO:0001403 GO:0044088	S. cerevisiae																	70	50	3	0	0	0	0	0		0	0	0	0	0
OG0004492	NP_013604.1	YML103C NUP188	Nucleoporin NUP188	P52593	Nucleoporin NUP188	GO:0005635 GO:0031965 GO:0005643 GO:0044611 GO:0017056 GO:0031990 GO:0006999 GO:0006913 GO:0006606 GO:0006405	S. cerevisiae																	69	53	10	0	0	0	0	0		0	0	0	0	0
OG0004560	NP_011986.1	YHR118C ORC6	Origin recognition complex subunit 6	P38826	Origin recognition complex subunit 6	GO:0031261 GO:0005664 GO:0005656 GO:0005654 GO:0005634 GO:0003688 GO:0006270 GO:0006267 GO:0030466	S. cerevisiae																	69	53	9	0	0	0	0	0		0	0	0	0	0
OG0004527	NP_009459.1	YBL093C ROX3	Mediator of RNA polymerase II transcription subunit 19	P25046	Mediator of RNA polymerase II transcription subunit 19	GO:0070847 GO:0016592 GO:0005634 GO:0003713 GO:0003712 GO:0000122 GO:0045944 GO:0032968 GO:0060261 GO:0006357 GO:0051123 GO:0001113	S. cerevisiae																	69	52	11	0	0	0	0	0		0	0	0	0	0
OG0001766	NP_010362.3	YDR077W SED1	Cell wall protein SED1	Q01589	Cell wall protein SED1	GO:0071944 GO:0005576 GO:0009277 GO:0005739 GO:0005840 GO:0098552 GO:0005199 GO:0031505 GO:0000002	S. cerevisiae																	69	52	5	0	0	0	0	0		0	0	0	0	0
OG0004638	NP_013460.1	YLR356W ATG33	Autophagy-related protein 33	Q06485	Autophagy-related protein 33	GO:0031966 GO:0005739 GO:0000422 GO:0016236	S. cerevisiae																	69	51	6	0	0	0	0	0		0	0	0	0	0
OG0004019	NP_012493.1	YJL042W MHP1	MAP-homologous protein 1	P43638	MAP-homologous protein 1	GO:0005737 GO:0005874 GO:0005819 GO:0005200 GO:0031505 GO:0007026	S. cerevisiae																	68	54	3	0	0	0	0	0		0	0	0	0	0
OG0004698	NP_014248.3	YNL151C RPC31	DNA-directed RNA polymerase III subunit RPC7	P17890	DNA-directed RNA polymerase III subunit RPC7	GO:0005654 GO:0005634 GO:0005666 GO:0003677 GO:0016779 GO:0006386 GO:0006383 GO:0006384 GO:0042797	S. cerevisiae																	68	54	2	0	0	0	0	0		0	0	0	0	0
OG0004639	NP_012652.3	YJR118C ILM1	Protein of unknown function; may be involved in mitochondrial DNA maintenance; required for slowed DNA synthesis-induced filamentous growth	P47155	Protein ILM1	GO:0005783 GO:0005789 GO:0000002	S. cerevisiae																	68	51	5	0	0	0	0	0		0	0	0	0	0
OG0004699	NP_013816.1	YMR098C ATP25	Protein that associates with mitochondrial ribosome; required for the stability of Oli1p (Atp9p) mRNA; also required for the Oli1p ring formation; YMR098C is not an essential gene	Q03153	ATPase synthesis protein 25, mitochondrial	GO:0005743 GO:0005739 GO:0140053 GO:0033615 GO:0048255	S. cerevisiae																	67	53	4	0	0	0	0	0		0	0	0	0	0
OG0004650	NP_012800.1	YKL122C SRP21	Signal recognition particle subunit SRP21	P32342	Signal recognition particle subunit SRP21	GO:0005634 GO:0005786 GO:0003723 GO:0006614 GO:0006617	S. cerevisiae																	67	50	9	0	0	0	0	0		0	0	0	0	0
OG0004569	NP_011618.3	YGR104C SRB5	Subunit of the RNA polymerase II mediator complex; associates with core polymerase subunits to form the RNA polymerase II holoenzyme; essential for transcriptional regulation; required for proper termination of transcription for some genes; involved in telomere maintenance	P32585	Mediator of RNA polymerase II transcription subunit 18	GO:0070847 GO:0016592 GO:0005634 GO:0000979 GO:0003713 GO:0003712 GO:0045944 GO:0032968 GO:0060261 GO:0006357 GO:0051123 GO:0006369 GO:0001113	S. cerevisiae																	65	53	11	0	0	0	0	0		0	0	0	0	0
OG0004554	NP_116627.2	YFL026W STE2	Receptor for alpha-factor pheromone; seven transmembrane-domain GPCR that interacts with both pheromone and a heterotrimeric G protein to initiate the signaling response that leads to mating between haploid a and alpha cells	D6VTK4	Pheromone alpha factor receptor	GO:0038038 GO:0005886 GO:0004934 GO:0004932 GO:0005550 GO:0000755 GO:0000750	S. cerevisiae																	65	52	9	0	0	0	0	0		0	0	0	0	0
OG0004046	NP_009559.1	YBR005W RCR1	Chitin synthesis regulation, resistance to Congo red	P38212	Protein RCR1	GO:0005789 GO:0043231 GO:0005886 GO:0043495 GO:0071555 GO:0006033 GO:0072659 GO:0016192	S. cerevisiae																	68	52	11	2	0	0	0	0		0	0	0	0	0
OG0004507	NP_013561.1	YLR456W	pyridoxal 5'-phosphate synthase	Q06199	Pyridoxamine 5'-phosphate oxidase YLR456W homolog	GO:0005737 GO:0005634	S. cerevisiae																	71	51	8	1	0	0	0	0		0	0	0	0	0
OG0004641	NP_013389.1	YLR287C	Grap2 and cyclin-D-interacting	Q05881	Uncharacterized protein YLR287C	GO:0005737 GO:0005634	S. cerevisiae																	70	48	7	0	0	0	0	0		0	0	0	0	0
OG0004674	NP_014250.1	YNL149C PGA2	Protein trafficking PGA2	P53903	Processing of GAS1 and ALP protein 2	GO:0005783 GO:0005789 GO:0005635 GO:0031965 GO:0015031	S. cerevisiae																	62	51	10	0	0	0	0	0		0	0	0	0	0
1, D. hansenii, Debaryomyces hansenii; S. cerevisiae, Saccharomyces cerevisiae; S. pombe, Schizosaccharomyces pombe.
	present in >90% species
	present in >60% and <=90 species
	present in >30% and <=60 species
	present in model organism

## Sheet: S5h
Supplementary Table 5h. OGs that characterise Basidiomycota (characteristically present OGs).
OG ID	Genbank			UniProt				Model organism				Alphafold												Pezizomycotina (72)	Saccharomycotina (54)	Taphrinomycotina (11)	Agaricomycotina (71)	Wallemiomycotina (2)	Pucciniomycotina (17)	Ustilaginomycotina (15)	early-diverging lineages (17)		Drosophila melanogaster	Dictyostelium discoideum	Homo sapiens	Arabidopsis thaliana	Caenorhabditis elegans
												AFDB50/MMseqs2						AFDB/Foldseek
	representative protein ID	gene description in a reference genome	domain search result	ID	protein name	GO	reference genome used1	ID	protein name	GO	reference genome used	# of accessions found	Average pLDDT	UniProt ID	protein name	GO	reference genome used	# of accessions found	Average pLDDT	UniProt ID	protein name	GO	reference genome used
OG0004465	EUC56706.1	BRCA2_oligonucleotide/oligosaccharide-binding domain 1 protein		X8J657	BRCA2, oligonucleotide/oligosaccharide-binding domain 1 protein	GO:0000724	R. solani																	0	0	0	68	1	17	15	17		0	1	1	1	0
OG0004579	EUC66010.1	T-cell immunomodulatory protein_ partial		X8JPW2	T-cell immunomodulatory protein	GO:0016020	R. solani																	0	0	0	71	2	17	15	16		1	1	1	0	1
OG0004656	EUC67092.1	DEAD-box ATP-dependent RNA helicase_ putative		X8JTK3	DEAD-box ATP-dependent RNA helicase, putative	GO:0005524 GO:0004386 GO:0003676	R. solani																	0	0	0	70	2	17	15	14		1	1	1	1	1
OG0004782	XP_007869331.1	uncharacterized protein GLOTRDRAFT_64912	MAEBL; Provisional (PTZ00121 super family)	S7RD59	Ribosome biogenesis protein SLX9	na	G. trabeum					2	72.5	A0A5C3MW47	Ribosome biogenesis protein SLX9	na	Heliocybe sulcata	2	71.94	A0A1Q3DYV7	Ribosome biogenesis protein SLX9	na	Lentinula edodes	0	0	0	69	2	17	15	14		1	0	0	0	0
OG0004580	XP_009270243.1	Membrane-bound transcription factor site-2 protease		R9A9Z4	Endopeptidase S2P	GO:0005737 GO:0012505 GO:0016020 GO:0004222 GO:0031293 GO:1905897	W. ichthyophaga																	0	0	0	69	2	17	7	14		1	1	1	1	1
OG0004645	EUC55540.1	cation channel family transporter		X8J0N5	Cation channel family transporter	GO:0016020 GO:0005216	R. solani																	0	2	0	68	0	17	14	14		0	1	0	0	0
OG0004723	EUC66031.1	hypothetical protein RSOL_505890		X8JS43	Dynactin subunit	GO:0005869 GO:0061640	R. solani																	0	0	0	70	1	17	13	14		0	1	1	0	0
OG0004487	EUC66300.1	inositol-pentakisphosphate 2-kinase		X8JQV3	Inositol-pentakisphosphate 2-kinase	GO:0005524 GO:0035299 GO:0016310	R. solani																	0	0	0	69	1	16	14	13		1	1	1	1	1
OG0004004	EUC62995.1	CSR1-phosphatidylinositol transfer-like protein, putative		X8JGC0	CSR1-phosphatidylinositol transfer-like protein, putative	GO:0005829 GO:0005741 GO:0005634	R. solani																	0	0	0	71	0	15	15	13		0	1	1	0	1
OG0004091	EUC66514.1	NADH-ubiquinone reductase complex 1 MLRQ subunit		X8JS04	NADH-ubiquinone reductase complex 1 MLRQ subunit	GO:0016020	R. solani																	1	0	0	62	1	17	14	13		1	0	1	0	0
OG0004703	EUC58329.1	3-beta hydroxysteroid dehydrogenase/isomerase family containing protein		A0A0A1UHM1	Conserved oligomeric Golgi complex subunit 5	GO:0000139 GO:0017119 GO:0016853 GO:0006891	R. solani																	0	0	0	67	1	17	13	13		1	1	1	1	1
OG0004742	EUC54576.1	surfeit locus protein 5 subunit 22 of mediator complex protein		X8J017	Surfeit locus protein 5 subunit 22 of mediator complex protein	GO:0016592 GO:0003712 GO:0006357	R. solani																	0	0	0	70	2	17	10	13		1	1	1	1	1
OG0004916	EUC59737.1	vitamin-D-receptor interacting mediator subunit 4		A0A0A1UL47	Mediator of RNA polymerase II transcription subunit 4	GO:0070847 GO:0016592 GO:0003712 GO:0006357	R. solani																	0	0	0	67	2	12	13	13		1	1	1	1	1
OG0004581	EUC64293.1	2,3-diketo-5-methylthio-1-phosphopentane phosphatase		X8JMV1	2,3-diketo-5-methylthio-1-phosphopentane phosphatase	GO:0046872 GO:0016791	R. solani																	1	0	0	69	2	16	14	12		1	0	1	1	0
OG0004592	EUC63882.1	RNA-binding domain protein		X8JJD4	RNA-binding domain protein	GO:0003729 GO:0000340	R. solani																	0	0	0	71	1	17	13	12		1	0	1	1	1
OG0004802	EUC67588.1	elongator complex protein, putative		X8JX11	Elongator complex protein, putative	GO:0033588 GO:0002098	R. solani																	0	0	0	68	1	13	12	12		0	1	1	1	1
OG0003025	EUC64964.1	SNARE associated protein		X8JMQ6	SNARE associated protein	GO:0016020	R. solani																	0	0	0	71	2	17	15	11		1	1	1	1	1
OG0003856	EUC67027.1	something about silencing_ SAS_ complex subunit 4		X8JTD6	Something about silencing, SAS, complex subunit 4	na	R. solani					6	58.12	M5BSD2	Something about silencing protein 4 domain-containing protein	na	Thanatephorus cucumeris	7	55.31	A0A3N4ISB3	Something about silencing protein 4 domain-containing protein	GO:0033255 GO:0004402	Ascobolus immersus	0	0	0	70	2	17	14	11		0	0	0	0	0
OG0004427	EUC62242.1	secretory carrier-associated membrane-like protein		X8JEV8	Secretory carrier-associated membrane-like protein	GO:0016020 GO:0015031	R. solani																	0	0	0	71	2	17	15	11		1	1	1	1	1
OG0004720	EUC57802.1	nucleoporin		X8J788	Nucleoporin NUP188	GO:0005643 GO:0017056 GO:0051028 GO:0015031	R. solani																	0	0	0	70	1	16	15	11		0	0	0	1	0
OG0004609	EUC66948.1	josephin-domain protein	transcription termination factor Rho; Provisional	X8JV99	ubiquitinyl hydrolase 1	GO:0005634 GO:0004843 GO:0006508	R. solani																	0	0	0	69	0	17	14	11		1	1	1	1	1
OG0004801	AAW42561.2	protein serine/threonine phosphatase 4 regulatory subunit 1, putative		Q5KJV6	Protein serine/threonine phosphatase 4 regulatory subunit 1, putative	GO:0005737 GO:0019888	C. deneoformans																	1	0	0	70	0	11	14	11		0	1	1	0	1
OG0004872	EUC66045.1	DNA directed RNA polymerase I subunit		X8JQ03	DNA directed RNA polymerase I subunit	GO:0006360	R. solani																	0	0	0	70	0	17	10	11		0	1	1	0	0
OG0004476	XP_009266541.1	Protein asteroid		ß	Protein asteroid	GO:0004518	W. ichthyophaga																	0	0	0	71	2	12	15	10		1	1	1	0	0
OG0004488	EUC56378.1	hypothetical protein RSOL_174700		X8J1Z3	BCAS3 WD40 domain-containing protein	GO:0005737 GO:0006914 GO:0042594	R. solani																	0	0	0	67	2	16	9	10		1	1	1	1	1
OG0004684	EUC61764.1	etoposide-induced protein		X8JDP3	Etoposide-induced protein	GO:0005783 GO:0016020 GO:0016236	R. solani																	0	1	0	64	0	17	15	10		1	1	1	1	1
OG0004688	AAW46591.2	expressed protein		Q5K8G8	Expressed protein	GO:0005634 GO:0006325	C. deneoformans																	0	1	0	70	1	16	15	10		0	0	0	0	0
OG0004873	EUC64136.1	GBF1 protein		X8JLQ9	GBF1 protein	GO:0005085 GO:0032012	R. solani																	0	0	0	70	0	17	13	10		0	0	0	0	0
OG0004876	XP_572315.1	hypothetical protein CNH01250		Q5KCJ6	Caprin-1 dimerization domain-containing protein	na	C. deneoformans	Q9LFX8	Glycine-rich protein	GO:0005634 GO:0003729	Arabidopsis thaliana													0	2	0	67	0	17	11	10		0	0	0	1	0
OG0004972	EUC54082.1	bromodomain associated protein		X8IWP4	Bromodomain associated protein	GO:0005669 GO:0046982	R. solani																	0	0	0	66	0	17	13	10		0	0	0	1	0
OG0004131	EUC54829.1	ser-thr-rich glycosyl-phosphatidyl-inositol-anchored membrane family protein		X8J014	Ser-thr-rich glycosyl-phosphatidyl-inositol-anchored membrane family protein	na	R. solani					9	70.31	L8X136	GPI-anchored domain-containing protein	na	Thanatephorus cucumeris	15	80.19	A0A8B2VKQ0	5'-Nucleotidase C-terminal domain-containing protein	GO:0016787 GO:0009166	Cutibacterium acnes	0	0	0	70	1	16	14	9		0	0	0	0	0
OG0004364	EUC58221.1	membrane permease_ putative_ partial		A0A0A1UIM9	Membrane permease, putative	GO:0000794 GO:0016020 GO:0016887 GO:0000712	R. solani																	0	0	0	69	0	17	15	9		0	0	0	0	0
OG0004819	EUC64114.1	DSPc domain protein	cys-based protein tyrosine phosphatase and dual-specificity phosphatase superfamily; cl28904	X8JKA3	protein-tyrosine-phosphatase	GO:0016311	R. solani																	0	0	0	70	2	17	14	9		0	0	1	0	0
OG0004258	EUC63345.1	transmembrane protein, putative		X8JHD6	Transmembrane protein, putative	GO:0016020	R. solani																	0	0	0	70	2	14	15	9		0	0	0	0	0
OG0004762	EUC61768.1	hypothetical protein RSOL_405950		X8JFQ9	Uncharacterized protein	na	R. solani					12	50.69	A0A068YA77	Ensconsin Microtubule associated protein 7	GO:0015630 GO:0000226	Echinococcus multilocularis	35	50.38	A0A316YY50	Condensin complex subunit 2	GO:0000796 GO:0005737 GO:0003682 GO:0051301 GO:0007076	Acaromyces ingoldii	1	0	0	68	0	13	15	9		0	0	0	0	0
OG0000456	EUC59261.1	carbohydrate-binding module family 13 protein_ putative		A0A0A1ULF7	Carbohydrate-binding module family 13 protein, putative	GO:0016020	R. solani																	0	0	0	71	2	17	15	8		0	0	0	0	0
OG0004748	XP_007772291.1	glycosyltransferase family 20 protein		A0A5M3MHA7	Glycosyltransferase family 20 protein	GO:0016740 GO:0005992	C. puteana																	0	0	0	70	2	17	15	8		0	0	0	1	0
OG0004630	EUC53779.1	helix loop helix DNA-binding domain protein		X8IX29	Helix loop helix DNA-binding domain protein	GO:0005634 GO:0003677 GO:0046983	R. solani																	0	0	0	71	2	16	15	8		0	0	0	0	0
OG0004660	EUC64838.1	paladin		X8JPD1	Paladin	GO:0005829	R. solani																	0	0	0	71	2	17	15	8		0	0	1	1	0
OG0004892	EUC64859.1	ankyrin repeat protein		X8JMH2	Ankyrin repeat protein	na	R. solani					61	89.94	A0A409VMI3	F-box domain-containing protein	na	Psilocybe cyanescens	36	82.75	A0A0H2SDY9	Ankyrin	na	Schizopora paradoxa	0	0	0	68	0	15	14	8		0	0	0	0	0
OG0004935	XP_016605637.1	uncharacterized protein SPPG_07066		A0A0L0H8T9	Fibronectin type-III domain-containing protein	GO:0016020	S. punctatus																	0	2	0	68	1	15	11	8		0	1	0	0	1
OG0004922	EUC64096.1	ribosomal protein subunit protein		X8JLL5	Ribosomal protein subunit protein	GO:0005840	R. solani																	0	0	0	70	2	12	15	7		0	0	0	0	0
OG0004744	EUC53876.1	TRAPP domain protein	Perilipin family; pfam03036	X8IXW4	TRAPP domain protein	na	R. solani					71	55.88	A0A1C7LSP7	Perilipin-2	GO:0005829 GO:0005811 GO:0019915 GO:0010890	Grifola frondosa	34	75.88	A0A0D7B269	Lipid droplet-associated perilipin protein	GO:0005829 GO:0005811 GO:0019915 GO:0010890	Cylindrobasidium torrendii	0	0	0	68	2	17	15	6		1	0	0	0	0
OG0004921	EUC60356.1	ornithine decarboxylase antizyme protein		X8JAR6	Ornithine decarboxylase antizyme	GO:0005737 GO:0005634 GO:0008073 GO:0045732 GO:0075523	R. solani																	0	0	0	67	2	17	13	6		0	0	0	0	0
OG0005009	ORX83460.1	hypothetical protein K493DRAFT_320259		A0A1Y1XCH0	UBA domain-containing protein	GO:0000813 GO:0043130 GO:0043162	B. meristosporus																	0	0	0	66	2	15	13	6		0	0	0	0	0
OG0005098	EUC65730.1	transmembrane protein, putative, partial		X8JP54	Transmembrane protein, putative	GO:0016020	R. solani																	0	0	0	65	2	15	12	6		0	0	0	1	0
OG0004956	AAW45947.2	hypothetical protein CNJ00840	Sen15 protein; pfam09631	Q5KAQ8	tRNA-splicing endonuclease subunit Sen15 domain-containing protein	GO:0000214 GO:0003676 GO:0000379	C. deneoformans																	0	0	0	68	1	16	14	5		0	1	1	0	0
OG0004874	EUC62434.1	hypothetical protein RSOL_420370	Sld7 C-terminal domain; pfam18596	X8JFH7	Sld7 C-terminal domain-containing protein	na	R. solani					7	63.56	A0A0B4GHY0	Ebs-bah-phd domain-containing protein	GO:0003682	Metarhizium guizhouense	5	69.12	A0A409VEM2	Sld7 C-terminal domain-containing protein	na	Panaeolus cyanescens	0	0	0	68	2	16	14	5		0	0	0	0	0
OG0004687	EUC65177.1	CAP-gly domain protein		X8JN16	CAP-gly domain protein	na	R. solani					23	56.09	A0A401NHK6	BTB domain-containing protein	GO:0061138	Scyliorhinus torazame	24	64.88	A0A1B9G5Y6	BTB domain-containing protein	na	Kwoniella bestiolae	1	0	0	65	2	16	14	5		0	0	0	0	0
OG0005021	EUC54624.1	membrane-associating domain protein		X8IZI1	Membrane-associating domain protein	GO:0016020	R. solani																	0	0	0	70	2	15	11	5		0	0	0	0	0
OG0004859	XP_067521492.1	uncharacterized protein RO3G_10807		I1CCB6	Nucleolar 27S pre-rRNA processing Urb2/Npa2 C-terminal domain-containing protein	GO:0005730 GO:0042254	R. delemar																	0	0	0	67	2	15	15	4		0	0	0	0	0
OG0004920	EUC61335.1	transmembrane protein_ putative		X8JBF7	Transmembrane protein, putative	GO:0016020	R. solani																	0	0	0	69	2	17	15	3		0	0	0	0	0
OG0005048	XP_007864687.1	uncharacterized protein GLOTRDRAFT_137895		S7RSI6	Wings apart-like protein C-terminal domain-containing protein	GO:0000077	G. trabeum																	0	0	0	70	0	15	15	3		0	0	0	0	0
OG0005053	EUC58189.1	DUF4604 domain protein		A0A0A1UHH7	DUF4604 domain protein	na	R. solani					54	67.75	A0A1B7N9C1	DUF4604 domain-containing protein	na	Rhizopogon vinicolor	36	68.62	A0A5C3LRX8	DUF4604 domain-containing protein	na	Crucibulum laeve	0	0	0	71	0	16	12	3		0	0	0	0	0
OG0005067	OAD00446.1	hypothetical protein MUCCIDRAFT_166227		A0A168IWI3	F-box domain-containing protei	GO:0019005 GO:0031146	M. lusitanicus																	1	0	0	69	1	17	11	3		0	0	0	0	0
OG0005070	KLT44417	hypothetical protein CC85DRAFT_311187		A0A0J0XTM1	R3H-associated N-terminal domain-containing protein	GO:0003676	C. oleaginosum																	0	0	0	69	2	16	12	3		0	0	0	0	0
OG0005092	XP_001731657.1	uncharacterized protein MGL_0925		A8PVP8	F-box domain-containing protein	GO:0019005	M. globosa																	1	1	0	63	2	14	15	3		0	1	0	0	0
OG0004394	EUC62894.1	transmembrane protein, putative		X8JGU5	Transmembrane protein, putative	GO:0016020	R. solani																	0	0	0	70	2	17	11	2		0	0	0	0	0
OG0004628	EUC59625.1	centrosomal targeting protein pact-coil coil: pericentrin-AKAP-450 domain protein		A0A0A1ULB2	Centrosomal targeting protein pact-coil coil: pericentrin-AKAP-450 domain protein	GO:0005737 GO:0005815	R. solani																	2	2	0	71	1	14	11	2		1	0	1	0	0
OG0005194	XP_001732553.1	uncharacterized protein MGL_0328		A8PSW6	Uncharacterized protein	na	M. globosa					0						4	38.62	A0A433U0F0	Uncharacterized protein	GO:0005730 GO:0005654	Elysia chlorotica	0	0	0	63	0	17	14	2		0	0	0	0	0
OG0004917	EUC54091.1	PPR domain protein	Protein Kinases, catalytic domain; cl21453	X8IYM3	PPR domain protein	na	R. solani					42	73.94	A0A369JNT2	Pentatricopeptide repeat-containing protein 5, mitochondrial	na	Hypsizygus marmoreus	57	72.44	A0A286U832	Cytochrome P450 monooxygenase 113	GO:0004497	Pyrrhoderma noxium	0	0	0	71	2	16	15	1		0	0	0	1	1
OG0005127	EUC56051.1	afadin and alpha actinin-binding protein		X8J4A6	Afadin and alpha actinin-binding protein	GO:0005737 GO:0005856	R. solani																	0	0	0	66	2	16	14	1		0	0	0	0	0
OG0005152	EUC66093.1	transmembrane protein_ putative		X8JSV2	Transmembrane protein, putative	GO:0016020	R. solani																	0	0	0	69	0	16	14	1		0	0	0	0	0
OG0004396	XP_003307264.1	uncharacterized protein PGTG_00214		E3JRG9	Uncharacterized protein	GO:0005829 GO:0017057 GO:0009051	P. graminis																	2	0	0	71	2	17	15	1		1	1	0	0	0
OG0004895	EUC65086.1	transmembrane protein, putative, partial		X8JPI6	Transmembrane protein, putative	GO:0016020	R. solani																	2	0	0	71	2	13	12	1		0	0	0	0	0
OG0004919	XP_003336062.1	uncharacterized protein PGTG_17499		E3L518	Chitin synthase export chaperone	GO:0016020	P. graminis																	0	0	0	69	2	11	15	1		0	0	0	0	0
OG0004976	EUC66161.1	RhoGEF domain protein		X8JSJ0	RhoGEF domain protein	GO:0005737 GO:0005085 GO:0035025	R. solani																	0	0	0	69	2	17	8	1		0	0	0	0	0
OG0005094	EUC54391.1	Gtpbp2 protein		X8IZD7	Gtpbp2 protein	GO:0003746	R. solani																	0	1	0	68	1	17	12	1		0	0	0	0	0
OG0005125	EUC57680.1	hypothetical protein RSOL_229830		X8J6M9	Ribosomal protein L24	GO:1990904 GO:0005840 GO:0003723	R. solani																	0	0	0	63	2	15	14	1		0	0	0	0	0
OG0003654	EUC63874.1	membrane-associating domain protein		X8JJN0	Membrane-associating domain protein	GO:0016020	R. solani																	0	0	0	71	2	17	15	0		0	0	0	0	0
OG0004063	EUC65188.1	RNI-like protein_ putative	protein phosphatase 1 regulatory subunit 42	X8JQC6	RNI-like protein, putative	GO:0030027 GO:0005886 GO:0016477 GO:0034315	R. solani																	0	0	0	66	0	17	14	0		0	0	0	0	0
OG0004749	EUC67605.1	F-box-like domain protein_ putative		X8JUK2	F-box-like domain protein, putative	na	R. solani					17	34.62	A0A674BFX0	Pre-mRNA 3'-end-processing factor FIP1	GO:0016020 GO:0005847 GO:0006397	Salmo trutta	25	49.5	Q582B7	Uncharacterized protein	GO:0005929	Trypanosoma brucei brucei	0	0	0	71	0	17	15	0		0	0	0	0	0
OG0004857	EUC55912.1	transmembrane protein_ putative_ partial		X8J1V9	Transmembrane protein, putative	GO:0016020	R. solani																	0	0	0	71	0	17	14	0		0	0	0	0	0
OG0004875	EUC62357.1	alcohol dehydrogenase groES-like domain protein_ putative	Medium chain reductase/dehydrogenase (MDR)/zinc-dependent alcohol dehydrogenase-like family; cl16912	X8JF47	Alcohol dehydrogenase groES-like domain protein, putative	GO:0016491	R. solani																	0	0	0	71	2	16	15	0		0	0	0	0	0
OG0004891	EUC60961.1	tyrosine kinase domain protein	VHS (Vps27/Hrs/STAM) domain of LAS seventeen-binding protein 5; cd16980, Protein Kinases, catalytic domain; cl21453	X8JCF4	Tyrosine kinase domain protein	GO:0005524 GO:0035091 GO:0004672 GO:0043130 GO:0007015 GO:0006897 GO:0006886 GO:0016310 GO:0007034	R. solani																	0	0	0	69	0	16	15	0		1	0	0	0	0
OG0004894	EUC63787.1	transmembrane protein_ putative		X8JJ65	Transmembrane protein, putative	GO:0016020	R. solani																	0	0	0	69	2	17	14	0		0	0	0	0	0
OG0004939	KLT38943.1	hypothetical protein CC85DRAFT_331165	large tegument protein UL36; Provisional	A0A0J0XD12	Uncharacterized protein	GO:0036286 GO:0005886 GO:0008289 GO:0070941 GO:0006897	C. oleaginosum																	0	0	0	71	2	16	14	0		0	0	0	0	0
OG0004940	EUC66727.1	transmembrane amino acid transporter protein		X8JSM1	Transmembrane amino acid transporter protein	GO:0016020	R. solani																	0	0	0	71	1	16	14	0		0	0	0	0	0
OG0005026	XP_003328349.2	uncharacterized protein PGTG_09643	DNA polymerase III subunits gamma and tau (CDD:236090)	E3KI05	Uncharacterized protein	na	P. graminis					22	65.94	Q4D1M1	ACT domain-containing protein	na	Trypanosoma cruzi	12	45.47	A0A1S3JNW7	Uncharacterized protein LOC106174600	GO:0016020	Lingula unguis	0	0	0	68	2	17	15	0		0	0	0	0	0
OG0005072	KLT44596.1	hypothetical protein CC85DRAFT_283529	DNA replication factor Cdt1 C-terminal domain; pfam16679	A0A0J0XU25	DNA replication factor Cdt1 C-terminal domain-containing protein	GO:0007049	C. oleaginosum																	0	0	0	69	2	17	14	0		0	0	0	0	0
OG0000448	EUC57040.1	ser-thr-rich glycosyl-phosphatidyl-inositol-anchored membrane family protein		X8J4Z0	Ser-thr-rich glycosyl-phosphatidyl-inositol-anchored membrane family protein	GO:0016020	R. solani																	1	0	0	71	2	17	15	0		0	0	0	0	0
OG0003825	AAW41152.2	conserved hypothetical protein		Q5KNK0	PH domain-containing protein	GO:0005737 GO:0031267 GO:0030833	C. deneoformans																	0	0	0	71	2	15	11	0		0	0	0	0	0
OG0004082	EUC58219.1	transmembrane protein, putative		A0A0A1UHI3	Transmembrane protein, putative	GO:0071944 GO:0016020	R. solani																	0	0	0	70	0	13	14	0		0	0	0	0	0
OG0004659	EUC59494.1	ferric reductase NAD-binding domain protein		A0A0A1UK23	ferric-chelate reductase (NADPH)	GO:0005886 GO:0000293 GO:0015677 GO:0006879 GO:0006826	R. solani																	0	0	0	63	2	17	14	0		0	0	0	0	0
OG0004818	EUC65063.1	hypothetical protein RSOL_496230		X8JPX1	SHSP domain-containing protein	na	R. solani					91	64.19	A0A061EM62	17.6 kDa class II heat shock protein	GO:0016020	Theobroma cacao	58	73.5	A0A0C2N0M6	Heat shock protein Hsp-16.48/Hsp-16.49	GO:0005737 GO:0005634 GO:0051082 GO:0042026 GO:0009408	Thelohanellus kitauei	0	0	0	69	0	14	12	0		0	0	0	0	0
OG0004957	EUC56439.1	transmembrane protein, putative		X8J4H5	Transmembrane protein, putative	GO:0016020	R. solani																	0	0	0	71	2	16	13	0		0	0	0	0	0
OG0004993	CCF54742.1	uncharacterized protein UHOR_01507		I2G6E9	Proteophosphoglycan ppg4	na	U. hordei					14	54.41	V5E7U9	Proteophosphoglycan ppg4	na	Kalmanozyma brasiliensis	2	42.25	A0A4Y7SMI9	Uncharacterized protein	na	Coprinellus micaceus	1	0	0	69	2	15	15	0		0	0	0	0	0
OG0005022	EUC64024.1	ankyrin repeat protein		X8JK07	Ankyrin repeat protein	GO:0008270 GO:0010468	R. solani																	1	0	0	69	2	15	15	0		0	0	0	0	0
OG0005047	XP_016274885.1	uncharacterized protein RHTO_06825		M7X0G2	Uncharacterized protein	GO:0016020	R. toruloides																	0	1	0	69	2	12	13	0		0	1	0	0	0
OG0005050	XP_003338293.2	uncharacterized protein PGTG_19913		E3LBE9	Uncharacterized protein	GO:0005730	P. graminis																	1	0	0	67	2	17	14	0		0	0	0	0	0
OG0005052	EUC64391.1	transmembrane protein, putative		X8JMG9	Transmembrane protein, putative	na	R. solani					8	80.75	A0A3M7BZR7	Mmc1 C-terminal domain-containing protein	na	Hortaea werneckii	16	79.38	M2XME3	Mmc1 C-terminal domain-containing protein	GO:0016020	Dothistroma septosporum	0	0	0	69	2	16	12	0		0	0	0	0	0
OG0005069	EUC58886.1	hypothetical protein RSOL_283840		A0A0A1UKE9	Uncharacterized protein	na	R. solani					14	63.75	M5FQ24	Uncharacterized protein	na	Dacryopinax primogenitus	25	64.94	A8PVY7	Uncharacterized protein	na	Malassezia globosa	0	0	0	69	2	14	15	0		0	0	0	0	0
OG0005071	EUC61551.1	transmembrane protein, putative		X8JE23	Transmembrane protein, putative	GO:0016020	R. solani																	0	0	0	71	2	16	11	0		0	0	0	0	0
OG0005073	XP_016274158.1	uncharacterized protein RHTO_07910		M7XGN8	Proteophosphoglycan ppg4	na	R. toruloides					35	79.06	A0A6J3J8W2	Phosphoinositide phospholipase C	GO:0005509 GO:0004435 GO:0016042 GO:0046488 GO:0048015 GO:0051209	Sapajus apella	30	80.88	A0A6P7QNE6	Phosphoinositide phospholipase C	GO:0005509 GO:0004435 GO:0016042 GO:0046488 GO:0048015 GO:0051209	Mus caroli	0	0	0	71	2	15	12	0		0	0	0	0	0
OG0005091	XP_014566391.1	uncharacterized protein L969DRAFT_18794		G7DSE3	Uncharacterized protein	na	M. osmundae					1	44.78	A0A0S7FGV0	COQ3	na	Poeciliopsis prolifica	4	45.41	A0A182IUU3	DM5 domain-containing protein	GO:0062129 GO:0008010 GO:0040003	Anopheles atroparvus	0	0	0	70	2	17	11	0		0	0	0	0	0
OG0005093	XP_016276309.1	uncharacterized protein RHTO_02918		M7X515	Serine/arginine repetitive matrix protein 2	GO:0016020	R. toruloides																	0	0	0	70	2	14	15	0		0	0	0	0	0
OG0005095	EUC54178.1	ribonuclease-III-like protein		X8IVL4	Ribonuclease-III-like protein	GO:0005762 GO:0004525 GO:0003735 GO:0032543 GO:0006396	R. solani																	0	0	0	70	1	17	13	0		0	0	0	0	0
OG0005102	XP_567220.1	hypothetical protein CNA06740		Q5KNE8	F-box domain-containing protein	na	C. deneoformans					545	92.25	A0A6P8YAR6	SCF E3 ubiquitin ligase complex F-box protein grrA-like isoform X1	GO:0019005 GO:0031146	Thrips palmi	1017	92.44	A0A7M7QNI9	Uncharacterized protein	GO:0019005 GO:0031146	Nasonia vitripennis	1	0	0	66	2	15	15	0		0	0	0	0	0
OG0005124	EUC66751.1	transcription factor TFIID complex subunit 8 carboxy-term protein		X8JUD1	Transcription initiation factor TFIID subunit 8	GO:0005669 GO:0046982 GO:0006367	R. solani																	0	0	0	65	2	15	15	0		0	0	0	0	1
OG0005128	EUC64311.1	hypothetical protein RSOL_439010		X8JMA0	Uncharacterized protein	na	R. solani					66	47.5	A0A5C6GE65	Centrosomin N-terminal motif 1 domain-containing protein	GO:0005737 GO:0005815	Metarhizium rileyi	38	55.03	A0A3N0YY42	Tripartite motif-containing protein 29	GO:0003676 GO:0008270 GO:0015074	Anabarilius grahami	0	0	0	69	2	15	15	0		0	0	0	0	0
OG0005133	EUC65353.1	1,4-alpha-glucan branching enzyme		X8JQU1	1,4-alpha-glucan branching enzyme	na	R. solani					76	71.06	A0A4U7B3P5	Mtf2-like C-terminal domain-containing protein	GO:0005739	Elsinoe australis	35	79.56	A0A505HYJ5	Glycosyl hydrolase 47 family protein	GO:0005739 GO:0016787	Aspergillus niger	0	0	0	70	2	15	13	0		0	0	0	0	0
OG0005153	EUC64305.1	transmembrane protein, putative		X8JK56	Transmembrane protein, putative	GO:0016020	R. solani																	0	0	0	70	2	15	10	0		0	0	0	0	0
OG0005155	XP_572495.1	hypothetical protein CNH03250		Q5KD45	PB1 domain-containing protein	na	C. deneoformans					12	68.19	A0A1E3JR41	PB1 domain-containing protein	na	Cryptococcus amylolentus	3	58.72	A0A1R1YSQ9	CCHC-type domain-containing protein	GO:0003676 GO:0008270	Smittium culicis	0	0	0	69	1	15	15	0		0	0	0	0	0
OG0005174	EUC67188.1	SUR7/PalI family protein		X8JW04	SUR7/PalI family protein	GO:0051285 GO:0005886 GO:0031505	R. solani																	0	0	0	62	2	16	14	0		0	0	0	0	0
OG0005177	EUC66343.1	mediator complex protein		X8JTM2	Mediator of RNA polymerase II transcription subunit 11	GO:0016592 GO:0003712 GO:0006357	R. solani																	0	0	0	67	2	13	13	0		0	0	0	0	0
OG0005178	XP_016270059.1	zinc finger, RING-type protein		M7WM65	Zinc finger, RING-type protein	GO:0008270	R. toruloides																	0	0	0	66	1	16	13	0		0	0	0	0	0
OG0005195	XP_014567769.1	uncharacterized protein L969DRAFT_17569		G7DVQ7	Small-subunit processome Utp12 domain-containing protein	GO:0005730 GO:0003723 GO:0030490	M. osmundae																	0	0	0	67	1	15	15	0		0	0	0	0	0
OG0005196	EUC57857.1	40S ribosomal protein S18-coprinopsis cinerea-like protein, putative		X8J7E3	40S ribosomal protein S18-coprinopsis cinerea-like protein, putative	GO:0016020 GO:0005840	R. solani																	0	0	0	67	1	15	14	0		0	0	0	0	0
na, not available.
1, B. meristosporus, Basidiobolus meristosporus; C. deneoformans, Cryptococcus neoformans; C. oleaginosum, Cutaneotrichosporon oleaginosum; C. puteana, Coniophora puteana; G. trabeum, Gloeophyllum trabeum; M. globosa, Malassezia globosa; M. osmundae, Mixia osmundae; M. lusitanicus, Mucor lusitanicus; P. graminis, Puccinia graminis; R. solani, Rhizoctonia solani; R. delemar, Rhizopus delemar; R. t…
	present in >90% species
	present in >60% and <=90 species
	present in >30% and <=60 species
	present in model organism

## Sheet: S5i
Supplementary Table 5i. OGs present in all species.
OG ID	Genbank		UniProt
	representative protein ID	gene description in a reference genome	ID1	protein name	GO
OG0000001	NP_009385.2	YAL017W PSK1, serine/threonine protein kinase PSK1	P31374	Serine/threonine-protein kinase PSK1	GO:0005737 GO:0005829 GO:0005634 GO:0005524 GO:0004672 GO:0106310 GO:0004674 GO:0035556 GO:0045719 GO:0016310 GO:0060917 GO:0006417
OG0000003	NP_009622.1	YBR066C NRG2, Nrg2p	P38082	Probable transcriptional regulator NRG2	GO:0005634 GO:0031519 GO:0005667 GO:0000981 GO:0046872 GO:0000978 GO:0043565 GO:0000433 GO:0043709 GO:2000221 GO:0000122 GO:0006357
OG0000005	NP_009800.1	YBR241C VVS1, Vvs1p	P38142	Probable metabolite transport protein YBR241C	GO:0000329 GO:0016020 GO:0015149 GO:0022857 GO:0015749 GO:0055085
OG0000007	NP_009980.1	YCR051W, uncharacterized protein YCR051W	P25631	Ankyrin repeat-containing protein YCR051W	GO:0005737 GO:0005634
OG0000009	NP_009661.1	YBR103W SIF2, Sif2p	P38262	SIR4-interacting protein SIF2	GO:0005634 GO:0070210 GO:0034967 GO:0003714 GO:0009267 GO:0006325 GO:0006974 GO:0045835 GO:0032874 GO:0006355 GO:0006357
OG0000015	NP_116638.1	YFL016C MDJ1, Mdj1p	P35191	DnaJ homolog 1, mitochondrial	GO:0005737 GO:0005759 GO:0005739 GO:0005524 GO:0001671 GO:0031072 GO:0046872 GO:0051082 GO:0006458 GO:0051085 GO:0000002 GO:0006515 GO:0042026 GO:0009408
OG0000021	NP_011471.1	YGL044C RNA15, Rna15p	P25299	mRNA 3'-end-processing protein RNA15	GO:0005847 GO:0005849 GO:0005848 GO:0060090 GO:0003729 GO:0006378 GO:0006397
OG0000023	NP_009490.1	YBL063W KIP1, Kip1p	P28742	Kinesin-like protein KIP1	GO:0005737 GO:0005871 GO:0072686 GO:0005634 GO:0005876 GO:0005524 GO:0008017 GO:0003777 GO:0008574 GO:0030543 GO:0051301 GO:0000073 GO:0007019 GO:0007018 GO:0000070 GO:0090307 GO:0000022 GO:0051231
OG0000025	NP_009638.1	YBR082C UBC4, E2 ubiquitin-conjugating protein UBC4	P15731	Ubiquitin-conjugating enzyme E2 4	GO:0005737 GO:0005634 GO:0000151 GO:0005524 GO:0070628 GO:0030674 GO:0043130 GO:0061631 GO:0031625 GO:0004842 GO:0071629 GO:0072671 GO:0006513 GO:0000209 GO:0016567 GO:0072344 GO:1990116 GO:0006511 GO:0043162
OG0000026	NP_009707.3	YBR149W ARA1, D-arabinose 1-dehydrogenase	P38115	D-arabinose dehydrogenase [NAD(P)+] heavy chain	GO:0005829 GO:0004032 GO:0047816 GO:0106271 GO:0045290 GO:0005975
OG0000030	NP_009618.2	YBR062C, uncharacterized protein YBR062C	P38239	Uncharacterized RING finger protein YBR062C	GO:0005737 GO:0046872 GO:0061630 GO:0016567
OG0000031	NP_009718.3	YBR160W CDC28, cyclin-dependent serine/threonine-protein kinase CDC28	P00546	Cyclin-dependent kinase 1	GO:0005935 GO:0000307 GO:0005737 GO:0010494 GO:0005783 GO:0005634 GO:0005524 GO:0030332 GO:0004693 GO:0042393 GO:0004672 GO:0106310 GO:0004674 GO:0000993 GO:0006370 GO:0051301 GO:0006974 GO:0000729 GO:0006303 GO:0000082 GO:0000086 GO:0000706 GO:1990758 GO:0090307 GO:1902596 GO:0045892 GO:2001033 GO:0051447 GO:1903500 GO:0045930 GO:0045875 GO:0000122 GO:0045893 GO:1905168 GO:0045819 GO:0051446 GO:…
OG0000036	NP_009944.2	YCR018C SRD1, Srd1p	P09007	Pre-rRNA-processing protein SRD1	GO:0005737 GO:0005634 GO:0043565 GO:0008270 GO:0006355 GO:0006364
OG0000042	NP_012529.3	YJL005W CYR1, adenylate cyclase	P08678	Adenylate cyclase	GO:0005829 GO:0005789 GO:0005739 GO:0005886 GO:0004016 GO:0005524 GO:0000287 GO:0007188 GO:0006171 GO:0046579 GO:0007265
OG0000044	NP_009796.1	YBR237W PRP5, DEAD-box RNA helicase PRP5	P21372	Pre-mRNA-processing ATP-dependent RNA helicase PRP5	GO:0000243 GO:0005634 GO:0005524 GO:0016887 GO:0008186 GO:0003676 GO:0003724 GO:0000348 GO:0000398
OG0000047	NP_010423.4	YDR139C RUB1, NEDD8 family protein RUB1	Q03919	NEDD8-like protein RUB1	GO:0005737 GO:0031386 GO:0031625 GO:0019941 GO:0045116 GO:0030162
OG0000048	NP_010255.1	YDL029W ARP2, actin-related protein 2	P32381	Actin-related protein 2	GO:0030479 GO:0015629 GO:0005885 GO:0003779 GO:0005524 GO:0016887 GO:0044396 GO:0045010 GO:0034314 GO:0030476 GO:0032258 GO:0051654 GO:0000001
OG0000050	NP_009383.1	YAL019W FUN30, DNA-dependent ATPase FUN30	P31380	ATP-dependent helicase FUN30	GO:0000775 GO:0000781 GO:0031934 GO:0005739 GO:0005634 GO:0005524 GO:0016887 GO:0008094 GO:0140658 GO:0003682 GO:0003677 GO:0004386 GO:0042802 GO:0006338 GO:0000729 GO:0031507 GO:0000122 GO:0033120 GO:0000183 GO:0030466 GO:0031509
OG0000051	NP_010021.1	YCR097W HMRA1, Hmra1p	P0CY11	Silenced mating-type protein A1	GO:0005634 GO:0090571 GO:0003677 GO:0000981 GO:0003714 GO:0007532
OG0000059	NP_012148.1	YIL118W RHO3, Rho family GTPase RHO3	Q00245	GTP-binding protein RHO3	GO:0005933 GO:0005829 GO:0005886 GO:0005525 GO:0003924 GO:0019901 GO:0007015 GO:0030950 GO:0045921 GO:0090338 GO:0007165 GO:0007264
OG0000060	NP_009723.3	YBR164C ARL1, Arf family GTPase ARL1	P38116	ADP-ribosylation factor-like protein 1	GO:0005829 GO:0010008 GO:0005794 GO:0005802 GO:0005525 GO:0003924 GO:0032258 GO:0006897 GO:0043001 GO:0006886 GO:0016236 GO:0034067 GO:0034497 GO:0006623 GO:0031503 GO:0034976 GO:0098629 GO:0016192
OG0000062	NP_010948.1	YER031C YPT31, Rab family GTPase YPT31	P38555	GTP-binding protein YPT31/YPT8	GO:0005829 GO:0005768 GO:0005794 GO:0000139 GO:0005741 GO:0005739 GO:0055037 GO:0005802 GO:0005525 GO:0003924 GO:0006914 GO:0034498 GO:0006887 GO:0015031 GO:0016192
OG0000072	NP_009396.2	YAL005C SSA1, Hsp70 family ATPase SSA1	P10591	Heat shock protein SSA1	GO:0005737 GO:0005829 GO:0005576 GO:0009277 GO:0000329 GO:0005634 GO:0005886 GO:0017053 GO:0005524 GO:0016887 GO:0140662 GO:0031072 GO:0044183 GO:0000049 GO:0051082 GO:0051085 GO:0072318 GO:0002181 GO:0072671 GO:0045892 GO:0043161 GO:0006457 GO:0006606 GO:0000209 GO:0042026 GO:0006626 GO:0070482 GO:0006616 GO:0035617
OG0000075	NP_011651.3	YGR135W PRE9, proteasome core particle subunit alpha 3	P23638	Proteasome subunit alpha type-3	GO:0005829 GO:0005634 GO:0000502 GO:0019773 GO:0034515 GO:0010498 GO:0010499 GO:0080129 GO:0043161
OG0000076	NP_010929.3	YER013W PRP22, DEAH-box ATP-dependent RNA helicase PRP22	P24384	Pre-mRNA-splicing factor ATP-dependent RNA helicase PRP22	GO:0071013 GO:0071007 GO:0071021 GO:0005524 GO:0016887 GO:0003723 GO:0003724 GO:0000350 GO:0000390
OG0000077	NP_010156.2	YDL127W PCL2, cyclin PCL2	P25693	PHO85 cyclin-2	GO:0005935 GO:0005934 GO:0000307 GO:0005737 GO:0000131 GO:0005634 GO:0016538 GO:0019901 GO:0044843 GO:0051301 GO:0030952 GO:0001676 GO:0051726 GO:0051302 GO:0032878 GO:0031106
OG0000083	NP_010411.1	YDR126W SWF1, palmitoyltransferase SWF1	Q04629	Palmitoyltransferase SWF1	GO:0030479 GO:0032432 GO:0005783 GO:0005789 GO:0005794 GO:0042175 GO:0016409 GO:0019706 GO:0030866 GO:0030010 GO:0018345 GO:0006612 GO:0017157 GO:0042144
OG0000084	NP_009995.1	YCR069W CPR4, peptidylprolyl isomerase family protein CPR4	P25334	Peptidyl-prolyl cis-trans isomerase CPR4	GO:0005737 GO:0005783 GO:0000324 GO:0016020 GO:0016018 GO:0003755 GO:0006457
OG0000092	NP_010480.1	YDR194C MSS116, ATP-dependent RNA helicase	P15424	ATP-dependent RNA helicase MSS116, mitochondrial	GO:0005759 GO:0005739 GO:0005524 GO:0016887 GO:0003729 GO:0003723 GO:0003724 GO:0033592 GO:0000372 GO:0000373 GO:0000963 GO:0006397 GO:0006417 GO:0034337 GO:0006392
OG0000096	NP_009667.1	YBR109C CMD1, calmodulin	P06787	Calmodulin	GO:0030479 GO:0005933 GO:0005935 GO:0005934 GO:0005823 GO:0000131 GO:0043332 GO:0045160 GO:0031475 GO:0005509 GO:0048306 GO:0030234 GO:0051019 GO:0007114 GO:0007010 GO:0006897 GO:0000742 GO:0016237 GO:0006661 GO:2000601 GO:0006606 GO:0006898 GO:1903525 GO:0010968 GO:0051300 GO:0042144 GO:0030050
OG0000097	NP_009492.1	YBL061C SKT5, Skt5p	P34226	Chitin synthase regulator SKT5	GO:0005935 GO:0000131 GO:0016020 GO:0005886 GO:0008047 GO:0034221
OG0000100	NP_009928.1	YCR002C CDC10, septin CDC10	P25342	Cell division control protein 10	GO:0005619 GO:0042764 GO:0032153 GO:0005935 GO:0000144 GO:1990317 GO:0001400 GO:0043332 GO:0072687 GO:0015630 GO:0005628 GO:0031105 GO:0032160 GO:0005940 GO:0005876 GO:0005545 GO:0005525 GO:0003924 GO:0060090 GO:0070273 GO:0010314 GO:0005200 GO:0032186 GO:0061640 GO:0010458 GO:0000281 GO:0000921 GO:0000920 GO:0043934
OG0000104	NP_010055.1	YDL226C GCS1, GTPase-activating protein GCS1	P35197	ADP-ribosylation factor GTPase-activating protein GCS1	GO:0005856 GO:0005829 GO:0005768 GO:0000139 GO:0005739 GO:0048471 GO:0005802 GO:0003779 GO:0005096 GO:0046872 GO:0007015 GO:0048205 GO:0006888 GO:0043001 GO:0006890
OG0000112	NP_009887.1	YCL043C PDI1, protein disulfide isomerase PDI1	P17967	Protein disulfide-isomerase	GO:0005783 GO:0005788 GO:0106055 GO:0003756 GO:0015035 GO:0051082 GO:1904382 GO:1900103 GO:0036508 GO:0006457 GO:0034976
OG0000113	NP_011103.1	YER176W ECM32, RNA helicase	P32644	Putative ATP-dependent RNA helicase ECM32	GO:0005737 GO:0010494 GO:0005524 GO:0016887 GO:0003677 GO:0003678 GO:0003729 GO:0003723 GO:0003724 GO:0000184 GO:0006449
OG0000115	NP_009376.2	YAL026C DRS2, aminophospholipid-translocating P4-type ATPase DRS2	P39524	Phospholipid-transporting ATPase DRS2	GO:1990530 GO:0005783 GO:0010008 GO:1990531 GO:0005886 GO:0005802 GO:0005524 GO:0016887 GO:0140326 GO:0000287 GO:0140345 GO:0090555 GO:0070273 GO:0140346 GO:0090556 GO:0032456 GO:0006897 GO:0045332 GO:0006892
OG0000116	NP_010745.3	YDR457W TOM1, E3 ubiquitin-protein ligase TOM1	Q03280	E3 ubiquitin-protein ligase TOM1	GO:0005737 GO:0005730 GO:0005634 GO:0061630 GO:0004842 GO:0000448 GO:0000480 GO:0000447 GO:0000472 GO:0000278 GO:0051028 GO:0006913 GO:0006997 GO:0000209 GO:0016567 GO:0008361 GO:0006511
OG0000117	NP_011987.1	YHR119W SET1, histone methyltransferase SET1	P38827	Histone-lysine N-methyltransferase, H3 lysine-4 specific	GO:0000781 GO:0005634 GO:0048188 GO:0042800 GO:0140999 GO:0016279 GO:0003723 GO:0030437 GO:0044648 GO:0051568 GO:0097692 GO:0080182 GO:0042138 GO:0010629 GO:0090241 GO:0000122 GO:1905088 GO:0045944 GO:0006479 GO:0000183 GO:1902275 GO:1903341 GO:0006357 GO:0030466 GO:0055092 GO:0031509 GO:0007130 GO:0000723
OG0000122	NP_009378.1	YAL024C LTE1, mitotic regulator LTE1	P07866	Guanine nucleotide exchange factor LTE1	GO:0005933 GO:0005737 GO:0005886 GO:0005085 GO:0061510 GO:0007049 GO:0051301 GO:0031536 GO:0007265 GO:0016192
OG0000126	NP_009647.2	YBR089C-A NHP6B, high-mobility group nucleosome-binding protein	P11633	Non-histone chromosomal protein 6B	GO:0005694 GO:0005634 GO:0008301 GO:0043565 GO:0006338 GO:0006281 GO:0001195 GO:0070898 GO:0006366
OG0000127	NP_011442.3	YGL073W HSF1, stress-responsive transcription factor HSF1	P10961	Heat shock transcription factor	GO:0005739 GO:0005634 GO:0032993 GO:0003677 GO:0003700 GO:0000978 GO:0043565 GO:1904262 GO:0045944 GO:0070202 GO:0006357 GO:0043555 GO:0009408
OG0000129	NP_009605.1	YBR049C REB1, DNA-binding protein REB1	P21538	DNA-binding protein REB1	GO:0000785 GO:0005654 GO:0005634 GO:0001228 GO:0003700 GO:0000978 GO:0043565 GO:0000976 GO:0045944 GO:0006355 GO:0006357 GO:0006363 GO:0006369 GO:0001174
OG0000134	NP_009991.2	YCR065W HCM1, Hcm1p	P25364	Forkhead transcription factor HCM1	GO:0000785 GO:0005737 GO:0005634 GO:0003700 GO:0000981 GO:0000978 GO:0043565 GO:0034599 GO:0007005 GO:0045944 GO:0006357 GO:0051300
OG0000137	NP_011958.1	YHR090C YNG2, histone acetyltransferase YNG2	P38806	Chromatin modification-related protein YNG2	GO:0005829 GO:0035267 GO:0000786 GO:0005634 GO:0032777 GO:0046872 GO:0035064 GO:0006338 GO:0006281 GO:0006351 GO:0051321 GO:0006355
OG0000142	NP_010354.3	YDR069C DOA4, ubiquitin-specific protease DOA4	P32571	Ubiquitin carboxyl-terminal hydrolase 4	GO:0005829 GO:0005768 GO:0031902 GO:0005739 GO:0000502 GO:0004843 GO:1904669 GO:0006897 GO:0010995 GO:0070676 GO:0006275 GO:0010992 GO:0006511 GO:0043162
OG0000143	NP_012264.3	YIL002C INP51, phosphoinositide 5-phosphatase INP51	P40559	Phosphatidylinositol 4,5-bisphosphate 5-phosphatase INP51	GO:0030479 GO:0005737 GO:0016020 GO:0043813 GO:0004439 GO:0006897 GO:0046856 GO:0015031
OG0000147	NP_010157.1	YDL126C CDC48, AAA family ATPase CDC48	P25694	Cell division control protein 48	GO:0036266 GO:0005829 GO:0000837 GO:0005789 GO:0000839 GO:0043332 GO:0005739 GO:0005634 GO:0030894 GO:1990112 GO:0034098 GO:0005524 GO:0016887 GO:0042802 GO:0031593 GO:0019888 GO:0043130 GO:0046034 GO:0097352 GO:0071629 GO:0006274 GO:0016320 GO:0071712 GO:0016236 GO:0072671 GO:0051228 GO:0070651 GO:0071630 GO:0034727 GO:0010636 GO:1900182 GO:0043161 GO:0006515 GO:0043328 GO:0032984 GO:0072344 GO:…
OG0000152	NP_009974.1	YCR045C RRT12, Rrt12p	P25381	Subtilase-type proteinase RRT12	GO:0005619 GO:0005615 GO:0005635 GO:0004252 GO:0008236 GO:0030476 GO:0006508
OG0000156	NP_010213.1	YDL070W BDF2, Bdf2p	Q07442	Bromodomain-containing factor 2	GO:0071944 GO:0000785 GO:0005737 GO:0005634 GO:0001046 GO:0042393 GO:0070577 GO:0001094 GO:0006338 GO:0006281 GO:0031452 GO:0030435
OG0000158	NP_010236.1	YDL047W SIT4, type 2A-related serine/threonine-protein phosphatase SIT4	P20604	Serine/threonine-protein phosphatase PP1-1	GO:0005737 GO:0005634 GO:0000159 GO:0008287 GO:0046872 GO:0017018 GO:0004722 GO:0051301 GO:0034599 GO:0006281 GO:0000082 GO:0035556 GO:0032956 GO:0060237 GO:0031929 GO:0002098
OG0000161	NP_009373.1	YAL029C MYO4, myosin 4	P32492	Myosin-4	GO:0015629 GO:0005933 GO:0005934 GO:0005737 GO:0031941 GO:0005739 GO:0031475 GO:0031982 GO:0051015 GO:0005524 GO:0005516 GO:0000146 GO:0007015 GO:0048309 GO:0008298 GO:0007533 GO:0051028 GO:0030050
OG0000163	NP_013917.1	YMR192W GYL1, Gyl1p	Q04322	Probable GTPase-activating protein GYL1	GO:0005933 GO:0005935 GO:0005934 GO:0005737 GO:0005798 GO:0000131 GO:0005739 GO:0005886 GO:0005096 GO:0006888 GO:0006887 GO:0015031 GO:0017157
OG0000173	NP_013915.1	YMR190C SGS1, ATP-dependent DNA helicase SGS1	P35187	ATP-dependent helicase SGS1	GO:0005694 GO:0005737 GO:0005730 GO:0005634 GO:0031422 GO:0043138 GO:0005524 GO:0016887 GO:0009378 GO:0003676 GO:0051276 GO:0000729 GO:0032508 GO:0006265 GO:0006268 GO:0000724 GO:0007534 GO:0045132 GO:0000706 GO:0044818 GO:0031573 GO:0000070 GO:0010947 GO:0010520 GO:0000723 GO:0000722 GO:0031860
OG0000177	NP_011584.2	YGR070W ROM1, Rho family guanine nucleotide exchange factor ROM1	P53046	RHO1 GDP-GTP exchange protein 1	GO:0005737 GO:0005085 GO:0007264
OG0000178	NP_009823.2	YBR264C YPT10, Rab family GTPase YPT10	P38146	GTP-binding protein YPT10	GO:0005737 GO:0012505 GO:0000329 GO:0005886 GO:0031982 GO:0030234 GO:0005525 GO:0003924 GO:0019001 GO:0007030 GO:0006886
OG0000185	NP_009676.1	YBR118W TEF2, translation elongation factor EF-1 alpha	P02994	Elongation factor 1-alpha	GO:0005737 GO:0005856 GO:0005829 GO:0005853 GO:0000329 GO:0005739 GO:0005840 GO:0051015 GO:0019003 GO:0005525 GO:0003924 GO:1904408 GO:0019901 GO:0043022 GO:0003746 GO:0051017 GO:0034198 GO:0006469 GO:0001933 GO:0006412 GO:0006414 GO:0006409
OG0000187	NP_010041.2	YDL240W LRG1, GTPase-activating protein LRG1	P35688	Rho-GTPase-activating protein LRG1	GO:0005935 GO:0005934 GO:0005737 GO:0000131 GO:0043332 GO:0005739 GO:0030427 GO:0005096 GO:0046872 GO:0030036 GO:0000755 GO:0090038 GO:0035024 GO:0090334 GO:0060237 GO:0007165 GO:0030435
OG0000188	NP_012394.1	YJL141C YAK1, serine/threonine protein kinase YAK1	P14680	Dual specificity protein kinase YAK1	GO:0005737 GO:0005634 GO:0005524 GO:0004672 GO:0106310 GO:0004674 GO:0004712 GO:0004713 GO:0016310 GO:0010811 GO:0045893 GO:0032106 GO:0010737
OG0000190	NP_009629.6	YBR073W RDH54, DNA-dependent ATPase RDH54	P38086	DNA repair and recombination protein RDH54	GO:0005634 GO:0005524 GO:0016887 GO:0008094 GO:0140658 GO:0015616 GO:0003690 GO:0004386 GO:0032508 GO:0032392 GO:0006310 GO:0006281 GO:0000724 GO:0030491 GO:0045144 GO:0007131
OG0000192	NP_009360.1	YAL040C CLN3, cyclin CLN3	P13365	G1/S-specific cyclin CLN3	GO:0000307 GO:0005737 GO:0005634 GO:0005816 GO:0016538 GO:0051301 GO:0044772 GO:1902806 GO:0001932 GO:0006357 GO:0007089 GO:0042144 GO:0007033
OG0000195	NP_009379.2	YAL023C PMT2, dolichyl-phosphate-mannose-protein mannosyltransferase PMT2	P31382	Dolichyl-phosphate-mannose--protein mannosyltransferase 2	GO:0097582 GO:0097584 GO:0005783 GO:0005789 GO:0004169 GO:0071712 GO:0009272 GO:0032527 GO:0006493 GO:0035269 GO:1900101
OG0000202	NP_013135.1	YLR035C MLH2, mismatch repair protein MLH2	Q07980	DNA mismatch repair protein MLH2	GO:0032389 GO:0032390 GO:0005634 GO:0005524 GO:0016887 GO:0140664 GO:0030983 GO:0000710 GO:0006298 GO:0007131
OG0000207	NP_009382.2	YAL020C ATS1, Ats1p	P31386	Protein KTI13	GO:0005737 GO:0061630 GO:0016567 GO:0002098 GO:0006511
OG0000215	NP_011049.2	YER123W YCK3, casein kinase YCK3	P39962	Casein kinase I homolog 3	GO:0000324 GO:0000329 GO:0031965 GO:0005634 GO:0005886 GO:0005524 GO:0004672 GO:0106310 GO:0004674 GO:0006897 GO:0016310 GO:0007165 GO:0016192
OG0000217	NP_009901.1	YCL029C BIK1, Bik1p	P11709	Nuclear fusion protein BIK1	GO:0005938 GO:0051286 GO:0000776 GO:0043332 GO:0005875 GO:0035371 GO:0005819 GO:0005876 GO:0005816 GO:0008017 GO:0030543 GO:0051301 GO:0000132 GO:0000742 GO:0000022 GO:0031115 GO:0000743
OG0000220	NP_010150.1	YDL132W CDC53, cullin CDC53	Q12018	Cell division control protein 53	GO:0000781 GO:0005737 GO:0005634 GO:0019005 GO:0003688 GO:0030674 GO:0031625 GO:0051301 GO:0071406 GO:0000082 GO:0000086 GO:0008053 GO:0031573 GO:0010828 GO:0016567 GO:0019222 GO:0007346 GO:0031335 GO:0000409 GO:0031146 GO:0030466 GO:0031509 GO:0006511
OG0000222	NP_009890.1	YCL040W GLK1, glucokinase	P17709	Glucokinase-1	GO:0005829 GO:0005739 GO:0005886 GO:0005524 GO:0008865 GO:0004340 GO:0005536 GO:0046835 GO:0051156 GO:0046323 GO:0006006 GO:0006096 GO:0001678 GO:0006013
OG0000234	NP_011932.2	YHR065C RRP3, RNA-dependent ATPase RRP3	P38712	ATP-dependent rRNA helicase RRP3	GO:0005730 GO:0005654 GO:0005634 GO:0032040 GO:0005524 GO:0016887 GO:0008186 GO:0003723 GO:0003724 GO:0030490 GO:0000462 GO:0006364
OG0000239	NP_011321.1	YGL194C HOS2, histone deacetylase HOS2	P53096	Probable histone deacetylase HOS2	GO:0005737 GO:0034399 GO:0005634 GO:0070210 GO:0034967 GO:0004407 GO:0045129 GO:0009267 GO:0006974 GO:0045835 GO:0032874 GO:0006355
OG0000240	NP_009532.1	YBL021C HAP, Hap3p	P13434	Transcriptional activator HAP3	GO:0016602 GO:0001228 GO:0000981 GO:0046982 GO:0000978 GO:0000436 GO:0006109 GO:0043457 GO:0006355 GO:0006357
OG0000241	NP_009837.1	YBR278W DPB3, DNA polymerase epsilon noncatalytic subunit	P27344	DNA polymerase epsilon subunit C	GO:0008623 GO:0008622 GO:0043596 GO:0005634 GO:0046982 GO:0006261 GO:0042276 GO:0006272
OG0000242	NP_012728.1	YKL193C SDS22, type 1 protein phosphatase-activating protein SDS22	P36047	Protein phosphatase 1 regulatory subunit SDS22	GO:0005737 GO:0005634 GO:0000164 GO:0072542 GO:0004865 GO:0051301 GO:0051276 GO:0007059 GO:0051457
OG0000245	NP_010988.1	YER066W RRT13, Rrt13p	P40042	Regulator of rDNA transcription protein 13	GO:0005634
OG0000249	NP_010887.3	YEL027W VMA3, H(+)-transporting V0 sector ATPase subunit c	P25515	V-type proton ATPase subunit c	GO:0000329 GO:0000139 GO:0016020 GO:0033176 GO:0016471 GO:0000220 GO:0015078 GO:0046961 GO:0006897 GO:0048388 GO:0061795 GO:0006878 GO:0006879 GO:0006623 GO:1902600 GO:0007035 GO:0007033
OG0000250	NP_010931.3	YER015W FAA2, medium-chain fatty acid-CoA ligase FAA2	P39518	Long-chain-fatty-acid--CoA ligase 2	GO:0005783 GO:0016020 GO:0005739 GO:0005778 GO:0005777 GO:0005524 GO:0102391 GO:0004467 GO:0031956 GO:0031957 GO:0006635 GO:0015916 GO:0015910 GO:0001676 GO:0042760
OG0000256	NP_009552.1	YBL003C HTA2, histone H2A	P04912	Histone H2A.2	GO:0000786 GO:0005634 GO:0031298 GO:0003677 GO:0046982 GO:0030527 GO:0006325 GO:0006281
OG0000258	NP_011777.3	YGR261C APL6, Apl6p	P46682	AP-3 complex subunit beta	GO:0030123 GO:0030665 GO:0005829 GO:0005794 GO:0006896 GO:0006886 GO:0006623 GO:0016192
OG0000259	NP_011501.1	YGL014W PUF4, Puf4p	P25339	Pumilio homology domain family member 4	GO:0005737 GO:0003729 GO:0017148 GO:0000288 GO:0010608 GO:0008104
OG0000260	NP_009501.1	YBL052C SAS3, histone acetyltransferase	P34218	Histone acetyltransferase SAS3	GO:0000781 GO:0033100 GO:1990467 GO:1990468 GO:0005634 GO:0004402 GO:0046872 GO:0003712 GO:0006351 GO:0045892 GO:0045944 GO:0030466 GO:0031509
OG0000262	NP_010193.1	YDL090C RAM1, protein farnesyltransferase	P22007	Protein farnesyltransferase subunit beta	GO:0005965 GO:0004660 GO:0008270 GO:0018343
OG0000264	NP_013789.1	YMR073C IRC21, Irc21p	Q04772	Increased recombination centers protein 21	GO:0005737 GO:0004128 GO:0020037 GO:0046872 GO:0006974 GO:0009410
OG0000278	NP_009741.3	YBR182C SMP1, Smp1p	P38128	Transcription factor SMP1	GO:0005737 GO:0005634 GO:0008301 GO:0000981 GO:0046983 GO:0000978 GO:0043565 GO:0045944
OG0000279	NP_011609.2	YGR095C RRP46, exosome non-catalytic core subunit RRP46	P53256	Exosome complex component RRP46	GO:0000177 GO:0000178 GO:0000176 GO:0005730 GO:0005634 GO:0003723 GO:0000467 GO:0071028 GO:0071042 GO:0071035 GO:0071038 GO:0034427 GO:0071051 GO:0006401 GO:0006396 GO:0016075 GO:0034475
OG0000280	NP_009617.3	YBR061C TRM7, tRNA methyltransferase TRM7	P38238	tRNA (cytidine(32)/guanosine(34)-2'-O)-methyltransferase	GO:0005737 GO:0005829 GO:1904047 GO:0106339 GO:0106340 GO:0016423 GO:0106050 GO:0008175 GO:0002181 GO:0030488 GO:0002128 GO:0002130
OG0000282	NP_011099.1	YER172C BRR2, ATP-dependent RNA helicase BRR2	P32639	Pre-mRNA-splicing helicase BRR2	GO:0005634 GO:0005681 GO:0046540 GO:0005682 GO:0005524 GO:0016887 GO:0042802 GO:0003676 GO:0003724 GO:0000398 GO:0000388
OG0000284	NP_012528.1	YJL006C CTK2, Ctk2p	P46962	CTD kinase subunit beta	GO:0032806 GO:0070692 GO:0008024 GO:0005829 GO:0005730 GO:0005654 GO:0005634 GO:0061575 GO:0006974 GO:0031124 GO:0032786 GO:0045943 GO:0045944 GO:0045903 GO:0006357
OG0000289	NP_116652.1	YFL003C MSH4, MutS family protein MSH4	P40965	MutS protein homolog 4	GO:0062128 GO:0000228 GO:0005634 GO:0005524 GO:0140664 GO:0030983 GO:0007131
OG0000293	NP_011424.3	YGL091C NBP35, Fe-S cluster-binding ATPase	P52920	Cytosolic Fe-S cluster assembly factor NBP35	GO:0005737 GO:0005829 GO:1990229 GO:1904564 GO:0005634 GO:0051539 GO:0005524 GO:0016887 GO:0140663 GO:0005506 GO:0051536 GO:0016226 GO:0002098
OG0000294	NP_010016.2	YCR092C MSH3, mismatch repair protein MSH3	P25336	DNA mismatch repair protein MSH3	GO:0005737 GO:0032301 GO:0032302 GO:0005634 GO:0005524 GO:0140664 GO:0032135 GO:0000406 GO:0003690 GO:0006310 GO:0000710 GO:0006298 GO:0006312 GO:0000735 GO:0043111
OG0000301	NP_116616.1	YFL037W TUB2, beta-tubulin	P02557	Tubulin beta chain	GO:0005737 GO:0005874 GO:0045298 GO:0005525 GO:0003924 GO:0046872 GO:0005200 GO:0031122 GO:0007010 GO:0000226 GO:0007017 GO:0000278 GO:0090307 GO:0000022 GO:0090316 GO:0046677
OG0000327	NP_010953.1	YER036C ARB1, ATP-binding cassette family ATPase ARB1	P40024	ABC transporter ATP-binding protein ARB1	GO:0005737 GO:0005634 GO:0005524 GO:0016887 GO:0006515 GO:0000056 GO:0042254
OG0000332	NP_010491.4	YDR205W MSC2, metal cation transporter MSC2	Q03455	Probable zinc transporter MSC2	GO:0031410 GO:0005783 GO:0005789 GO:0005794 GO:0031965 GO:0005385 GO:0006882 GO:0055085 GO:1904257 GO:0006829
OG0000337	NP_010724.1	YDR436W PPZ2, salt homeostasis regulator	P33329	Serine/threonine-protein phosphatase PP-Z2	GO:0005737 GO:0005634 GO:0046872 GO:0017018 GO:0004722 GO:0006883
OG0000343	NP_011512.1	YGL003C CDH1, Cdh1p	P53197	APC/C activator protein CDH1	GO:0005680 GO:0005737 GO:0005634 GO:0010997 GO:0030332 GO:1990757 GO:0031145 GO:0007049 GO:0051301 GO:1902426 GO:0010697 GO:1905786 GO:0120151 GO:0045842 GO:0045732 GO:0031398 GO:2000060
OG0000352	NP_012491.3	YJL044C GYP6, GTPase-activating protein GYP6	P32806	GTPase-activating protein GYP6	GO:0005829 GO:0005768 GO:0005802 GO:0005096 GO:0090630
OG0000355	NP_014030.1	YMR301C ATM1, ATP-binding cassette Fe/S cluster precursor transporter ATM1	P40416	Iron-sulfur clusters transporter ATM1, mitochondrial	GO:0005743 GO:0005739 GO:0140359 GO:0005524 GO:0016887 GO:0042626 GO:0006879 GO:0016226 GO:0140466 GO:1902497 GO:1990542 GO:0055085
OG0000360	NP_010248.1	YDL036C PUS9, pseudouridine synthase PUS9	Q12069	tRNA pseudouridine(32) synthase, mitochondrial	GO:0005737 GO:0005739 GO:0005634 GO:0009982 GO:0003723 GO:0106029 GO:0000455 GO:0031119
OG0000370	NP_011908.1	YHR042W NCP1, NADPH--hemoprotein reductase	P16603	NADPH--cytochrome P450 reductase	GO:0005829 GO:0005789 GO:0005741 GO:0005739 GO:0005886 GO:0009055 GO:0050660 GO:0010181 GO:0050661 GO:0003959 GO:0003958 GO:0006696
OG0000373	NP_012233.1	YIL031W ULP2, SUMO protease ULP2	P40537	Ubiquitin-like-specific protease 2	GO:0005634 GO:0008234 GO:0016929 GO:0003711 GO:0030261 GO:0007094 GO:0006276 GO:0016926 GO:0006508
OG0000374	NP_010661.3	YDR373W FRQ1, frequenin	Q06389	Calcium-binding protein NCS-1	GO:0033101 GO:0005829 GO:0000139 GO:0043231 GO:0016020 GO:0005509 GO:0008047 GO:0009966
OG0000389	NP_010921.1	YER006W NUG1, RNA-binding GTPase NUG1	P40010	Nuclear GTP-binding protein NUG1	GO:0005730 GO:0005634 GO:0030687 GO:0005525 GO:0003924 GO:0003729 GO:0003723 GO:0000463 GO:0015031 GO:0000055
OG0000394	NP_011860.1	YHL003C LAG1, sphingosine N-acyltransferase LAG1	P38703	Ceramide synthase LAG1	GO:0061576 GO:0005783 GO:0005789 GO:0050291 GO:0046513
OG0000401	NP_012266.1	YIR001C SGN1, Sgn1p	P40561	RNA-binding protein SGN1	GO:0005737 GO:0008143 GO:0016071
OG0000403	NP_013239.1	YLR138W NHA1, Nha1p	Q99271	Na(+)/H(+) antiporter	GO:0005783 GO:0045121 GO:0005886 GO:0015079 GO:0015385 GO:0030003 GO:0030007 GO:0097623 GO:0120029 GO:0042391 GO:0006970 GO:0036376 GO:0035725
OG0000406	NP_011913.1	YHR047C AAP1, arginine/alanine aminopeptidase	P37898	Alanine/arginine aminopeptidase	GO:0005737 GO:0005634 GO:0070006 GO:0042277 GO:0008270 GO:0005977 GO:0043171 GO:0006508
OG0000415	NP_015082.1	YPL242C IQG1, Iqg1p	Q12280	Ras GTPase-activating-like protein IQG1	GO:0005938 GO:0005935 GO:0000142 GO:0005737 GO:0120155 GO:0110085 GO:0005886 GO:0051015 GO:0005516 GO:0005096 GO:0032038 GO:0032033 GO:0032027 GO:1903475 GO:1903479 GO:0072741 GO:0031991 GO:1903338 GO:0032465 GO:1903471
OG0000422	NP_011033.3	YER107C GLE2, RNA export factor GLE2	P40066	mRNA export factor GLE2	GO:0005737 GO:0005635 GO:0031965 GO:0005643 GO:0003723 GO:0043130 GO:0051664 GO:0006913 GO:0016973 GO:0000973 GO:0015031 GO:2000728 GO:0006405 GO:0000972
OG0000426	NP_012926.1	YKR001C VPS1, dynamin-like GTPase VPS1	P21576	Vacuolar protein sorting-associated protein 1	GO:0030479 GO:0005737 GO:0005829 GO:0000329 GO:0005770 GO:0016020 GO:0005874 GO:0005741 GO:0005739 GO:0005777 GO:0005525 GO:0003924 GO:0008017 GO:0030036 GO:0051301 GO:0006897 GO:0060988 GO:0051321 GO:0016559 GO:0007031 GO:0045053 GO:0006623 GO:0007034
OG0000429	NP_010579.1	YDR293C SSD1, mRNA-binding translational repressor SSD1	P24276	Protein SSD1	GO:0005933 GO:0005935 GO:0005737 GO:0010494 GO:0005634 GO:0000932 GO:0000175 GO:0003730 GO:0048027 GO:0003729 GO:0000900 GO:0007049 GO:0051301 GO:0008298 GO:0006402 GO:0017148 GO:0060237 GO:1903450
OG0000441	NP_010673.1	YDR385W EFT2, elongation factor 2	P32324	Elongation factor 2	GO:0005829 GO:1990904 GO:0005525 GO:0003924 GO:0042802 GO:0051087 GO:0043022 GO:0019843 GO:0003746 GO:1990145 GO:0045901 GO:0006414
OG0000445	NP_011496.3	YGL019W CKB1, casein kinase 2 regulatory subunit CKB1	P43639	Casein kinase II subunit beta	GO:0032545 GO:0005737 GO:0005730 GO:0005654 GO:0005956 GO:0032040 GO:0034456 GO:0019887 GO:0030291 GO:0006974 GO:0030490 GO:0042790 GO:0051726 GO:0060962 GO:0006356 GO:0006359 GO:0000028
OG0000449	NP_011966.1	YHR098C SFB3, Sfb3p	P38810	SED5-binding protein 3	GO:0071944 GO:0030127 GO:0005783 GO:0070971 GO:0005789 GO:0000139 GO:0043332 GO:0005048 GO:0000149 GO:0008270 GO:0090110 GO:0006886
OG0000477	NP_010231.1	YDL052C SLC1, 1-acylglycerol-3-phosphate O-acyltransferase SLC1	P33333	1-acyl-sn-glycerol-3-phosphate acyltransferase	GO:0005783 GO:0005811 GO:0016020 GO:0003841 GO:0047184 GO:0106262 GO:0016024 GO:0046474 GO:0006654
OG0000481	NP_012485.1	YJL050W MTR4, ATP-dependent RNA helicase MTR4	P47047	ATP-dependent RNA helicase DOB1	GO:0005730 GO:0005634 GO:0031499 GO:0034458 GO:0005524 GO:0016887 GO:0003677 GO:0003729 GO:0016491 GO:0008143 GO:0003724 GO:0000467 GO:0000460 GO:0006397 GO:0071028 GO:0071031 GO:0071042 GO:0071035 GO:0071038 GO:0071051 GO:0006401 GO:0000292 GO:0016075 GO:0034475 GO:0034476
OG0000495	NP_011877.1	YHR013C ARD1, peptide alpha-N-acetyltransferase complex A subunit ARD1	P07347	N-terminal acetyltransferase A complex catalytic subunit ARD1	GO:0031415 GO:0042802 GO:1990190 GO:1990189 GO:0006474 GO:0061606
OG0000498	NP_011062.1	YER136W GDI1, Gdi1p	P39958	Rab GDP-dissociation inhibitor	GO:0005737 GO:0005096 GO:0005093 GO:0015031 GO:0007264 GO:0016192
OG0000501	NP_009964.2	CR035C RRP43, exosome non-catalytic core subunit RRP43	P25359	Exosome complex component RRP43	GO:0005737 GO:0000177 GO:0000178 GO:0000176 GO:0005730 GO:0005654 GO:0005634 GO:0003723 GO:0043928 GO:0000467 GO:0006402 GO:0006397 GO:0071028 GO:0071042 GO:0071035 GO:0071038 GO:0034427 GO:0006401 GO:0006396 GO:0016072 GO:0034473 GO:0034475 GO:0034476
OG0000506	NP_009981.1	YCR052W RSC6, Rsc6p	P25632	Chromatin structure-remodeling complex protein RSC6	GO:0000785 GO:0005634 GO:0016586 GO:0016514 GO:0006338 GO:0006337 GO:0032968 GO:0006357
OG0000510	NP_012503.2	YJL031C BET4, Rab geranylgeranyltransferase BET4	Q00618	Geranylgeranyl transferase type-2 subunit alpha	GO:0005737 GO:0005829 GO:0005777 GO:0005968 GO:0004663 GO:0031267 GO:0006888 GO:0018344 GO:0006612
OG0000511	NP_015322.1	YPL003W ULA1, Ula1p	Q12059	NEDD8-activating enzyme E1 regulatory subunit	GO:0005737 GO:0120123 GO:0005524 GO:0019781 GO:0045116
OG0000512	NP_012042.1	YHR172W SPC97, Spc97p	P38863	Spindle pole body component SPC97	GO:0005737 GO:0000923 GO:0000930 GO:0008275 GO:0005822 GO:0005874 GO:0044732 GO:0005634 GO:0005824 GO:0000922 GO:0005816 GO:0043015 GO:0031122 GO:0051321 GO:0007020 GO:0000278 GO:0010968 GO:0051225
OG0000515	NP_009728.1	YBR169C SSE2, adenyl-nucleotide exchange factor SSE2	P32590	Heat shock protein homolog SSE2	GO:0005737 GO:0005829 GO:0005634 GO:0000774 GO:0005524 GO:0140662 GO:0005516 GO:0010499 GO:0043161 GO:0006457 GO:0042026
OG0000517	NP_013344.1	YLR243W GPN3, putative signal sequence-binding GTPase GPN3	Q06543	GPN-loop GTPase 3	GO:0005525 GO:0003924 GO:0007064 GO:0006606
OG0000520	NP_010306.1	YDR023W SES1, serine--tRNA ligase SES1	P07284	Serine--tRNA ligase, cytoplasmic	GO:0005737 GO:0010494 GO:0005829 GO:0005524 GO:0004828 GO:0000049 GO:0002181 GO:0006434
OG0000525	NP_013298.1	YLR197W NOP56, snoRNP complex protein NOP56	Q12460	Nucleolar protein 56	GO:0030686 GO:0031428 GO:0005730 GO:0005654 GO:0005634 GO:0032040 GO:0003729 GO:0030515 GO:0000494 GO:0030490 GO:0000154 GO:0006364 GO:0000452
OG0000527	NP_010073.2	YDL208W NHP2, snoRNA-binding protein NHP2	P32495	H/ACA ribonucleoprotein complex subunit NHP2	GO:0031429 GO:0022625 GO:0005730 GO:0005732 GO:0034513 GO:0000493 GO:0000470 GO:0006364 GO:0031118 GO:0000454 GO:0031120
OG0000536	NP_012602.3	YJR068W RFC2, replication factor C subunit 2	P40348	Replication factor C subunit 2	GO:0031390 GO:0005663 GO:0031391 GO:0005634 GO:0031389 GO:0005524 GO:0016887 GO:0003677 GO:0090618 GO:0000077 GO:0006281 GO:0000076 GO:0006261 GO:0006272 GO:0006298 GO:0007064 GO:0007062
OG0000538	NP_010476.1	YDR190C RVB1, RuvB family ATP-dependent DNA helicase pontin	Q03940	RuvB-like protein 1	GO:0000785 GO:0031011 GO:0035267 GO:0005634 GO:0097255 GO:0000812 GO:0043139 GO:0005524 GO:0016887 GO:0003678 GO:0000492 GO:0006338 GO:0006281 GO:0050821 GO:0006355 GO:0006357
OG0000549	NP_010626.1	YDR339C FCF1, rRNA-processing protein FCF1	Q05498	rRNA-processing protein FCF1	GO:0005730 GO:0005654 GO:0032040 GO:0004521 GO:0000480 GO:0000447 GO:0000472 GO:0030490
OG0000555	NP_010680.1	YDR392W SPT3, transcriptional regulator SPT3	P06844	Protein SPT3	GO:0005829 GO:0005634 GO:0000124 GO:0046695 GO:0046982 GO:0003712 GO:0006325 GO:0001403 GO:0007124 GO:0006357 GO:0006366
OG0000557	NP_012113.1	YIL153W RRD1, peptidylprolyl isomerase RRD1	P40454	Serine/threonine-protein phosphatase 2A activator 1	GO:0000785 GO:0005737 GO:0005634 GO:0000159 GO:0003755 GO:0019888 GO:0008160 GO:0006914 GO:0006281 GO:0000082 GO:0007052 GO:0006357 GO:0031929
OG0000566	NP_011415.1	YGL100W SEH1, Seh1p	P53011	Nucleoporin SEH1	GO:0005635 GO:0031965 GO:0005643 GO:0031080 GO:0035859 GO:0005774 GO:0017056 GO:0034198 GO:0051028 GO:0006913 GO:1904263 GO:0015031 GO:1903432
OG0000569	NP_013509.1	YLR405W DUS4, tRNA dihydrouridine synthase	Q06063	tRNA-dihydrouridine(20a/20b) synthase [NAD(P)+]	GO:0050660 GO:0017150 GO:0102266 GO:0102267 GO:0006397 GO:0006400
OG0000575	NP_010179.1	YDL104C QRI7, putative N(6)-L-threonylcarbamoyladenine synthase	P43122	tRNA N6-adenosine threonylcarbamoyltransferase, mitochondrial	GO:0005739 GO:0046872 GO:0061711 GO:0072670 GO:0002949
OG0000576	NP_009364.1	YAL036C RBG1, GTP-binding protein RBG1	P39729	Ribosome-interacting GTPase 1	GO:0005737 GO:0010494 GO:0005525 GO:0003924 GO:0002181 GO:1903833
OG0000599	NP_012710.1	YKL212W SAC1, phosphatidylinositol-3-phosphatase SAC1	P32368	Phosphatidylinositol-3-phosphatase SAC1	GO:0032541 GO:0005783 GO:0005789 GO:0005797 GO:0000139 GO:0072517 GO:0005741 GO:0005739 GO:0035339 GO:0052629 GO:0004438 GO:0043812 GO:0090156 GO:0046856
OG0000614	NP_014904.3	YOR261C RPN8, proteasome regulatory particle lid subunit RPN8	Q08723	26S proteasome regulatory subunit RPN8	GO:0000502 GO:0008541 GO:0034515 GO:0008237 GO:0043161 GO:0006511
OG0000615	NP_009409.1	YAR015W ADE1, phosphoribosylaminoimidazolesuccinocarboxamide synthase	P27616	Phosphoribosylaminoimidazole-succinocarboxamide synthase	GO:0005737 GO:0005634 GO:0005524 GO:0004639 GO:0006189 GO:0006164
OG0000642	NP_012980.1	YKR054C DYN1, dynein heavy chain	P36022	Dynein heavy chain, cytoplasmic	GO:0000235 GO:0005938 GO:0005737 GO:0005868 GO:0005881 GO:0005816 GO:0005524 GO:0016887 GO:0045505 GO:0051959 GO:0008569 GO:0031122 GO:0040001 GO:0000132 GO:0000741 GO:0000070 GO:0007052 GO:0007097 GO:0030473
OG0000697	NP_010117.1	YDL164C CDC9, DNA ligase (ATP) CDC9	P04819	DNA ligase 1	GO:0005739 GO:0005634 GO:0005524 GO:0003677 GO:0003910 GO:0046872 GO:0006284 GO:0051301 GO:0071897 GO:0006266 GO:0006310 GO:0006273 GO:0035753 GO:0000278 GO:0006289 GO:1903461
OG0000727	NP_116606.1	YFL048C EMP47, Emp47p	P43555	Protein EMP47	GO:0030134 GO:0005789 GO:0005793 GO:0000329 GO:0000139 GO:0097367 GO:0005537 GO:0006888
OG0000728	NP_013507.1	YLR403W SFP1, zinc-coordinating transcription factor SFP1	P32432	Transcription factor SFP1	GO:0005737 GO:0005634 GO:0003677 GO:0046872 GO:0060963 GO:0045944 GO:0008361
OG0000745	NP_012473.1	YJL062W LAS21, mannose-ethanolamine phosphotransferase LAS21	P40367	GPI ethanolamine phosphate transferase 2	GO:0005783 GO:0005789 GO:0005886 GO:0051267 GO:0006506
OG0000753	NP_116578.3	YIL078W THS1, threonine--tRNA ligase THS1	P04801	Threonine--tRNA ligase, cytoplasmic	GO:0005737 GO:0005739 GO:0005524 GO:0004829 GO:0006435
OG0000787	NP_013071.1	YLL029W FRA1, aminopeptidase P	Q07825	Putative Xaa-Pro aminopeptidase FRA1	GO:0005737 GO:0005829 GO:0046872 GO:0070006 GO:0000122 GO:0006508
OG0000806	NP_014079.1	YNL320W , uncharacterized protein YNL320W	P42840	Uncharacterized membrane protein YNL320W	GO:0000324 GO:0016020 GO:0031966 GO:0005739 GO:0008474
OG0000826	NP_011416.3	YGL099W LSG1, putative GTPase LSG1	P53145	Large subunit GTPase 1	GO:0005737 GO:0005829 GO:0022625 GO:0043332 GO:0005525 GO:0003924 GO:0003729 GO:0015031 GO:0000027 GO:0000054
OG0000887	NP_012229.1	YIL035C CKA1, casein kinase 2 catalytic subunit CKA1	P15790	Casein kinase II subunit alpha	GO:0032545 GO:0005829 GO:0005730 GO:0005654 GO:0005634 GO:0005956 GO:0032040 GO:0034456 GO:0005524 GO:0004672 GO:0106310 GO:0004674 GO:0006974 GO:0007535 GO:0030490 GO:0042790 GO:0016310 GO:0051726 GO:0060962 GO:0006356 GO:0006359 GO:0000028
OG0000905	NP_009381.1	YAL021C CCR4, CCR4-NOT core exoribonuclease subunit CCR4	P31384	CCR4-Not complex 3'-5'-exoribonuclease subunit Ccr4	GO:0030014 GO:0030015 GO:0016593 GO:0005737 GO:0005634 GO:0000932 GO:0000175 GO:0046872 GO:0004535 GO:0003723 GO:0006260 GO:0000076 GO:0000288 GO:0000289 GO:0032968 GO:0006357 GO:0006368 GO:0007089
OG0000980	NP_116695.3	YFR037C RSC8, Rsc8p	P43609	Chromatin structure-remodeling complex protein RSC8	GO:0000785 GO:0005634 GO:0016586 GO:0016514 GO:0003677 GO:0042393 GO:0008270 GO:0006338 GO:0006303 GO:0006337 GO:0045893 GO:0006355 GO:0006368
OG0001009	NP_014934.1	YOR291W YPK9, putative acid anhydride hydrolase	Q12697	Vacuolar cation-transporting ATPase YPK9	GO:0000329 GO:0016020 GO:1990816 GO:0005524 GO:0016887 GO:0019829 GO:1903135 GO:0030145 GO:0015662 GO:0008270 GO:0006874 GO:0030026 GO:0006882 GO:0055085
OG0001057	NP_009462.2	YBL091C MAP2, methionine aminopeptidase	P38174	Methionine aminopeptidase 2	GO:0005737 GO:0005634 GO:0004177 GO:0004239 GO:0046872 GO:0070006 GO:0008235 GO:0051604 GO:0006508
OG0001102	NP_009464.2	YBL089W AVT5, amino acid transporter	P38176	Vacuolar amino acid transporter 5	GO:0000329 GO:0016020 GO:0061459 GO:0005313 GO:0005290 GO:0015189 GO:0015194 GO:0005302 GO:0022857 GO:0003333 GO:0055085
OG0001198	NP_011608.1	YGR094W VAS1, valine--tRNA ligase	P07806	Valine--tRNA ligase, mitochondrial	GO:0005737 GO:0005829 GO:0005739 GO:0002161 GO:0005524 GO:0004832 GO:0006438
OG0001245	NP_012818.1	YKL104C GFA1, glutamine--fructose-6-phosphate transaminase	P14742	Glutamine--fructose-6-phosphate aminotransferase [isomerizing]	GO:0097367 GO:0004360 GO:0006002 GO:0034221 GO:0006541 GO:0006487 GO:0006048 GO:0006047
OG0001273	NP_010347.1	YDR062W LCB2, serine C-palmitoyltransferase LCB2	P40970	Serine palmitoyltransferase 2	GO:0005783 GO:0016020 GO:0017059 GO:0035339 GO:0030170 GO:0004758 GO:0046513 GO:0090156 GO:0030148 GO:0046512
OG0001323	NP_009404.1	YAR007C RFA1, replication factor A subunit protein RFA1	P22336	Replication factor A protein 1	GO:0000781 GO:0000794 GO:0005737 GO:0005829 GO:0005662 GO:0005634 GO:0003690 GO:0046872 GO:0003729 GO:0043565 GO:0003697 GO:0006281 GO:0006260 GO:0006265 GO:0006268 GO:0000724 GO:0045184 GO:0030491 GO:0006312 GO:0006289 GO:0016567 GO:0007131 GO:0043934 GO:0000723 GO:0000722 GO:0007004 GO:0010833
OG0001347	NP_013580.1	YML126C ERG13, hydroxymethylglutaryl-CoA synthase	P54839	Hydroxymethylglutaryl-CoA synthase	GO:0005739 GO:0005634 GO:0004421 GO:0006084 GO:0006696 GO:0010142
OG0001371	NP_014311.3	YNL088W TOP2, DNA topoisomerase 2	P06786	DNA topoisomerase 2	GO:0097047 GO:0005739 GO:0005634 GO:0000795 GO:0005524 GO:0003677 GO:0003918 GO:0042802 GO:0046872 GO:0006325 GO:0031055 GO:0006271 GO:0006265 GO:0007131 GO:0000019 GO:0097046 GO:0000712 GO:0009303 GO:0000819
OG0001390	NP_012657.1	YJR123W RPS5, ribosomal 40S subunit protein S5	P26783	Small ribosomal subunit protein uS7	GO:0030686 GO:0005737 GO:0005829 GO:0022627 GO:0005840 GO:0003729 GO:0019843 GO:0003735 GO:0002181 GO:0006450 GO:0000028 GO:0000054 GO:0006412
OG0001393	NP_013341.1	YLR240W VPS34, phosphatidylinositol 3-kinase VPS34	P22543	Phosphatidylinositol 3-kinase VPS34	GO:0005737 GO:0005829 GO:0005768 GO:0010008 GO:0000329 GO:0000139 GO:0016020 GO:0071561 GO:0005777 GO:0000407 GO:0034045 GO:0034271 GO:0034272 GO:0016303 GO:0005524 GO:0004672 GO:0000045 GO:0006914 GO:0006897 GO:0045324 GO:0016236 GO:0000425 GO:0046854 GO:0036092 GO:0048015 GO:0016310 GO:0032968 GO:0015031
OG0001397	NP_012368.1	YJL167W ERG20, bifunctional (2E,6E)-farnesyl diphosphate synthase/dimethylallyltranstransferase	P08524	Farnesyl pyrophosphate synthase	GO:0005737 GO:0005783 GO:0005773 GO:0004161 GO:0004337 GO:0004452 GO:0046872 GO:0006696 GO:0045337 GO:0033384 GO:0008299
OG0001445	NP_013379.1	YLR277C YSH1, cleavage polyadenylation factor subunit YSH1	Q06224	Endoribonuclease YSH1	GO:0005847 GO:0005634 GO:0004534 GO:0046872 GO:0003723 GO:0004521 GO:0006378 GO:0006397 GO:0008380 GO:0031126 GO:0034247 GO:0006369 GO:0030846
OG0001484	NP_014980.3	YOR335C ALA1, alanine--tRNA ligase	P40825	Alanine--tRNA ligase, mitochondrial	GO:0005737 GO:0005829 GO:0005739 GO:0004813 GO:0002161 GO:0005524 GO:0000049 GO:0008270 GO:0006419 GO:0070143 GO:0045892
OG0001498	NP_014303.3	YNL096C RPS7B, ribosomal 40S subunit protein S7B	P48164	Small ribosomal subunit protein eS7B	GO:0030686 GO:0005829 GO:0022627 GO:0005730 GO:0032040 GO:0003735 GO:0002181 GO:0042274 GO:0042254 GO:0006364
OG0001506	NP_014152.1	YNL247W CRS1, cysteine--tRNA ligase	P53852	Cysteine--tRNA ligase	GO:0005737 GO:0005829 GO:0005739 GO:0005524 GO:0004817 GO:0046872 GO:0006423
OG0001507	NP_009455.3	YBL097W BRN1, condensin subunit BRN1	P38170	Condensin complex subunit 2	GO:0000796 GO:0005737 GO:0005634 GO:0003682 GO:0051301 GO:0030261 GO:0007076 GO:0000070 GO:0070058
OG0001511	NP_013888.1	YMR165C PAH1, phosphatidate phosphatase PAH1	P32567	Phosphatidic acid phosphohydrolase 1	GO:0005737 GO:0005829 GO:0005789 GO:0005811 GO:0031965 GO:0005634 GO:0005773 GO:0008195 GO:0000976 GO:0003713 GO:0009060 GO:0032869 GO:0009062 GO:0034389 GO:0008654 GO:0006276 GO:0045944 GO:0019432 GO:0042144
OG0001559	NP_015232.1	YPL093W NOG1, putative GTPase NOG1	Q02892	Nucleolar GTP-binding protein 1	GO:0005737 GO:0005730 GO:0030687 GO:0005525 GO:0003924 GO:0003723 GO:1902626 GO:0042273 GO:0000054 GO:0006364
OG0001617	NP_009757.1	YBR198C TAF5, chromatin modification protein	P38129	Transcription initiation factor TFIID subunit 5	GO:0005634 GO:0000124 GO:0046695 GO:0005669 GO:0003682 GO:0042802 GO:0060090 GO:0016251 GO:0043130 GO:0006325 GO:0045944 GO:0006357 GO:0006366 GO:0006367
OG0001624	NP_014811.3	YOR168W GLN4, glutamine--tRNA ligase	P13188	Glutamine--tRNA ligase	GO:0017101 GO:0005829 GO:0005739 GO:0005524 GO:0004819 GO:0003729 GO:0006425
OG0001633	NP_012123.1	YIL143C SSL2, TFIIH/NER complex ATPase/helicase subunit SSL2	Q00578	General transcription and DNA repair factor IIH helicase/translocase subunit XPB/SSL2	GO:0005829 GO:0000112 GO:0005634 GO:0000439 GO:0005675 GO:0097550 GO:0043138 GO:0005524 GO:0016887 GO:0003677 GO:0003678 GO:0015616 GO:0032508 GO:0006289 GO:0016973 GO:0000019 GO:0001111 GO:0006366 GO:0006367 GO:0001113
OG0001639	NP_015344.1	YPR019W MCM4, MCM DNA helicase complex subunit MCM4	P30665	DNA replication licensing factor MCM4	GO:0071162 GO:0005737 GO:0031261 GO:0042555 GO:0097373 GO:0005656 GO:0043596 GO:0005654 GO:0005634 GO:0031298 GO:0005524 GO:0016887 GO:0003688 GO:0004386 GO:0003697 GO:0017116 GO:0006270 GO:0006271 GO:0006268 GO:0000727 GO:1902975 GO:0033260 GO:0006267 GO:0006279
OG0001653	NP_014860.1	YOR217W RFC1, replication factor C subunit 1	P38630	Replication factor C subunit 1	GO:0005663 GO:0005634 GO:0005524 GO:0016887 GO:0003677 GO:0003689 GO:0061860 GO:0051301 GO:0006281 GO:0006261 GO:0006272 GO:0006298 GO:0000278
OG0001672	NP_011308.1	YGL207W SPT16, chromatin-remodeling protein SPT16	P32558	FACT complex subunit SPT16	GO:0000785 GO:0035101 GO:0031298 GO:0031491 GO:0006325 GO:0006281 GO:0006261 GO:0006334 GO:0034728 GO:0045899 GO:0060261 GO:1902275 GO:0007063 GO:0006368
OG0001678	NP_011378.1	YGL137W SEC27, coatomer subunit beta'	P41811	Coatomer subunit beta'	GO:0030126 GO:0000139 GO:0005198 GO:0043130 GO:0006888 GO:0006891 GO:0008298 GO:0006886 GO:0032511 GO:0006890
OG0001704	NP_011365.1	YGL150C INO80, chromatin-remodeling ATPase INO80	P53115	Chromatin-remodeling ATPase INO80	GO:0000781 GO:0031011 GO:0005634 GO:0005524 GO:0016887 GO:0140658 GO:0003677 GO:0042393 GO:0006338 GO:0032508 GO:0006281 GO:0045944 GO:0006355 GO:0019222 GO:0032006 GO:0006357 GO:0031509 GO:0000722 GO:0006366
OG0001709	NP_012040.1	YHR170W NMD3, ribosome-binding protein NMD3	P38861	60S ribosomal export protein NMD3	GO:0005737 GO:0005829 GO:0005654 GO:0005634 GO:0070180 GO:0043023 GO:0015031 GO:0000055
OG0001710	NP_012903.1	YKL022C CDC16, anaphase promoting complex subunit CDC16	P09798	Anaphase-promoting complex subunit CDC16	GO:0005680 GO:0005737 GO:0005829 GO:0005634 GO:0031145 GO:0007049 GO:0051301 GO:0032297 GO:0045842 GO:0016567 GO:0051445 GO:0007346
OG0001729	NP_012190.1	YIL075C RPN2, proteasome regulatory particle base subunit RPN2	P32565	26S proteasome regulatory subunit RPN2	GO:0005634 GO:0000502 GO:0008540 GO:0034515 GO:0030234 GO:0031625 GO:0043248 GO:0043161 GO:0042176 GO:0006511
OG0001750	NP_009679.2	YBR121C GRS1, glycine--tRNA ligase	P38088	Glycine--tRNA ligase 1, mitochondrial	GO:0005737 GO:0005759 GO:0005739 GO:0005524 GO:0004820 GO:0046983 GO:0016740 GO:0015966 GO:0006353 GO:0006426 GO:0070150
OG0001753	NP_011774.1	YGR258C RAD2, ssDNA endodeoxyribonuclease RAD2	P07276	DNA repair protein RAD2	GO:0000112 GO:0005634 GO:0004520 GO:0046872 GO:0003697 GO:0000014 GO:0006289 GO:0006366
OG0001767	NP_014112.1	YNL287W SEC21, coatomer subunit gamma	P32074	Coatomer subunit gamma	GO:0030126 GO:0005783 GO:0005793 GO:0005768 GO:0000139 GO:0005198 GO:0006888 GO:0006891 GO:0006886 GO:0072384 GO:0009306 GO:0006890
OG0001778	NP_010715.3	YDR427W RPN9, proteasome regulatory particle lid subunit RPN9	Q04062	26S proteasome regulatory subunit RPN9	GO:0005829 GO:0005634 GO:0000502 GO:0008541 GO:0034515 GO:0005198 GO:0043248 GO:0043161 GO:0006511
OG0001780	NP_011568.3	YGR054W , uncharacterized protein YGR054W	P53235	Eukaryotic translation initiation factor 2A	GO:0022626 GO:0022627 GO:0003729 GO:0043022 GO:0003743 GO:0000049 GO:0006413
OG0001818	NP_009477.1	YBL076C ILS1, isoleucine--tRNA ligase ILS1	P09436	Isoleucine--tRNA ligase, cytoplasmic	GO:0005829 GO:0002161 GO:0005524 GO:0004822 GO:0000049 GO:0006428
OG0001844	NP_014111.1	YNL288W CAF40, CCR4-NOT core subunit CAF40	P53829	Protein CAF40	GO:0030015 GO:0005634 GO:0000932 GO:0017148 GO:0000289 GO:0032968
OG0001845	NP_013951.1	YMR224C MRE11, MRX complex nuclease subunit	P32829	Double-strand break repair protein MRE11	GO:0005739 GO:0030870 GO:0005654 GO:0005634 GO:0035861 GO:0008408 GO:0008296 GO:0004520 GO:0003691 GO:0004519 GO:0051880 GO:0030145 GO:0060090 GO:0000014 GO:0043047 GO:0042162 GO:0030437 GO:0006284 GO:0000729 GO:0010791 GO:0006281 GO:0006302 GO:0000727 GO:0000724 GO:0006303 GO:0035753 GO:0042138 GO:0010780 GO:0097552 GO:0007095 GO:0031573 GO:0046940 GO:0062176 GO:0007131 GO:0006357 GO:0000723
OG0001878	NP_012771.1	YKL151C NNR2, NADHX dehydratase	P36059	ATP-dependent (S)-NAD(P)H-hydrate dehydratase	GO:0005737 GO:0052855 GO:0005524 GO:0047453 GO:0052856 GO:0052857 GO:0110051 GO:0046496
OG0002015	NP_010277.1	YDL007W RPT2, proteasome regulatory particle base subunit RPT2	P40327	26S proteasome regulatory subunit 4 homolog	GO:0005737 GO:0005634 GO:0000502 GO:0008540 GO:0005524 GO:0016887 GO:0036402 GO:0070651 GO:0043171 GO:0045732 GO:0070682 GO:0043161 GO:0031503 GO:0006511
OG0002045	NP_010856.1	YEL058W PCM1, phosphoacetylglucosamine mutase PCM1	P38628	Phosphoacetylglucosamine mutase	GO:0005737 GO:0005634 GO:0000287 GO:0004610 GO:0005975 GO:0071555 GO:0034221 GO:0030097 GO:0006048
OG0002056	NP_015057.1	YPL266W DIM1, putative dimethyladenosine transferase	P41819	Dimethyladenosine transferase	GO:0030686 GO:0005829 GO:0005730 GO:0030688 GO:0052909 GO:0003723 GO:0000179 GO:0000462 GO:0031167 GO:0000154
OG0002084	NP_009872.1	YCL059C KRR1, ribosome biosynthesis protein KRR1	P25586	KRR1 small subunit processome component	GO:0030686 GO:0005730 GO:0005654 GO:0030688 GO:0032040 GO:0003723 GO:0000447 GO:0030490 GO:0042274 GO:0006364
OG0002128	NP_011935.1	YHR068W DYS1, deoxyhypusine synthase	P38791	Deoxyhypusine synthase	GO:0005737 GO:0034038 GO:0008612
OG0002193	NP_011005.1	YER082C UTP7, Utp7p	P40055	U3 small nucleolar RNA-associated protein 7	GO:0030686 GO:0005730 GO:0005654 GO:0030688 GO:0032040 GO:0000480 GO:0000447 GO:0000472 GO:0030490 GO:0000462
OG0002229	NP_011020.3	YER094C PUP3, proteasome core particle subunit beta 3	P25451	Proteasome subunit beta type-3	GO:0005829 GO:0005634 GO:0000502 GO:0019774 GO:0061133 GO:0010499 GO:0043161
OG0002276	NP_009530.1	YBL023C MCM2, MCM DNA helicase complex subunit MCM2	P29469	DNA replication licensing factor MCM2	GO:0071162 GO:0005737 GO:0031261 GO:0042555 GO:0005656 GO:0043596 GO:0005654 GO:0005634 GO:0031298 GO:0043138 GO:0005524 GO:0016887 GO:0003682 GO:0003688 GO:0046872 GO:0003697 GO:0017116 GO:0006974 GO:0006271 GO:0006268 GO:0000727 GO:1902975 GO:0006267 GO:0006279
OG0002291	NP_013513.3	YLR409C UTP21, rRNA-processing protein UTP21	Q06078	U3 small nucleolar RNA-associated protein 21	GO:0030686 GO:0005730 GO:0005654 GO:0005634 GO:0034388 GO:0032040 GO:0030490 GO:0006364
1, data of Saccharomyces serevisiae is shown.
