# Supplementary material
Source: Research Square preprint supplement (doi:10.21203/rs.3.rs-8904859/v1)
Supplement: Supplementary file 6 [file d98ee3e39adaaed7f79d80f3.xlsx]

## Sheet: S4
Supplementary Table 4. Tukey–Kramer test results for PC1, PC2, and PC3.
(A) 1st component
Between phyla
	Ascomycota	Basidio-mycota	early divergent lineages
Ascomycota (n=137)	-	***	***
Basidiomycota (n=105)	<0.001	-	**
early divergent lineages (n=17)	<0.001	0.00731	-
Between subphyla
	Pezizo-mycotina	Saccharo-mycotina	Taphrino-mycotina	Agarico-mycotina	Puccinio-mycotina	Ustilagino-mycotina	Wallemio-mycotina	early divergent lineages
Pezizomycotina (n=72)	-	***	***	***	***	***	***	***
Saccharomycotina (n=54)	<0.001	-		***	***	***	**	***
Taphrinomycotina (n=11)	<0.001	1	-	***	***	***	**	*
Agaricomycotina (n=71)	<0.001	<0.001	<0.001	-	***	***		***
Pucciniomycotina (n=17)	<0.001	<0.001	<0.001	<0.001	-			***
Ustilaginomycotina (n=15)	<0.001	<0.001	<0.001	<0.001	1	-		***
Wallemiomycotina (n=2)	<0.001	0.00175	0.00389	0.31119	1	1	-
early divergent lineages (n=17)	<0.001	<0.001	0.01363	<0.001	<0.001	<0.001	0.36663	-
(B) 2nd component
Between phyla
	Ascomycota	Basidio-mycota	early divergent lineages
Ascomycota (n=137)		***
Basidiomycota (n=105)	<1e-05		***
early divergent lineages (n=17)	0.939	<1e-05
Between subphyla
	Pezizo-mycotina	Saccharo-mycotina	Taphrino-mycotina	Agarico-mycotina	Puccinio-mycotina	Ustilagino-mycotina	Wallemio-mycotina	early divergent lineages
Pezizomycotina (n=72)	-	***	***	***		***	*	***
Saccharomycotina (n=54)	<0.001	-	***	***	***	***	***	***
Taphrinomycotina (n=11)	<0.001	<0.001	-	***	***	***	*	*
Agaricomycotina (n=71)	<0.001	<0.001	<0.001	-	***	***	***	***
Pucciniomycotina (n=17)	0.99975	<0.001	<0.001	<0.001	-	**	*	***
Ustilaginomycotina (n=15)	<0.001	<0.001	<0.001	<0.001	0.00604	-		***
Wallemiomycotina (n=2)	0.01333	<0.001	0.01866	<0.001	0.03508	0.84656	-
early divergent lineages (n=17)	<0.001	<0.001	0.02015	<0.001	<0.001	<0.001	0.64722	-
(C) 3rd component
Between phyla
	Ascomycota	Basidio-mycota	early divergent lineages
Ascomycota (n=137)	-	*	***
Basidiomycota (n=105)	0.0219	-	*
early divergent lineages (n=17)	<0.001	0.0139	-
Between subphyla
	Pezizo-mycotina	Saccharo-mycotina	Taphrino-mycotina	Agarico-mycotina	Puccinio-mycotina	Ustilagino-mycotina	Wallemio-mycotina	early divergent lineages
Pezizomycotina (n=72)	-				***	**		**
Saccharomycotina (n=54)	0.70348	-			***	***		***
Taphrinomycotina (n=11)	0.84191	0.29738	-		.
Agaricomycotina (n=71)	0.90421	0.99971	0.42784	-	***	***		***
Pucciniomycotina (n=17)	<0.001	<0.001	0.05531	<0.001	-
Ustilaginomycotina (n=15)	0.00103	<0.001	0.56285	<0.001	0.92442	-
Wallemiomycotina (n=2)	0.9215	0.72363	0.99937	0.79086	0.97058	0.99985	-
early divergent lineages (n=17)	0.001	<0.001	0.63684	<0.001	0.83748	1	0.99996	-
Upper right is significant codes (‘***’ <0.001, ‘**’<0.01, ‘*’<0.05 and ‘.’<0.1) and lower left is p values.
