# Supplementary material
Source: Research Square preprint supplement (doi:10.21203/rs.3.rs-8904859/v1)
Supplement: Supplementary file 7 [file ff1efec77983f8c7b95ee882.xlsx]

## Sheet: S1
Supplementary Table 1. List of genomes used in this study.
s			ID	Sciencific name	Strain	Subkingdom	Phylum	Subphylum	Class	Order	Family	GenBank genome accession	JGI ID	Version number	Assembly name	Other references	Number of scaffolds	Size (Mb)	Number of genes in proteome	Number of orthogroups	References
Forestgreen	Dot	●	068	Cytospora mali	03-8	Dikarya	Ascomycota	Pezizomycotina	Sordariomycetes	Diaporthales	Cytosporaceae	GCA_000818155.1					353	44.7	11284	7045	1
Forestgreen	Dot	●	067	Beauveria bassiana	ARSEF 2860	Dikarya	Ascomycota	Pezizomycotina	Sordariomycetes	Hypocreales	Cordycipitaceae	GCA_000280675.1					235	33.7	10364	6473	2
Forestgreen	Dot	●	052	Trichoderma atroviride	IMI 206040	Dikarya	Ascomycota	Pezizomycotina	Sordariomycetes	Hypocreales	Hypocreaceae		Triat2	v2.0			29	36.1	11863	7353	3
Forestgreen	Dot	●	053	Trichoderma reesei	QM6a	Dikarya	Ascomycota	Pezizomycotina	Sordariomycetes	Hypocreales	Hypocreaceae	GCA_000167675.2					77	33.4	9115	6134	4
Forestgreen	Dot	●	054	Fusarium graminearum	PH-1	Dikarya	Ascomycota	Pezizomycotina	Sordariomycetes	Hypocreales	Nectriaceae	GCA_020991245.1					19	36.5	13313	8047	5
Forestgreen	Dot	●	055	Fusarium oxysporum	Fo5176	Dikarya	Ascomycota	Pezizomycotina	Sordariomycetes	Hypocreales	Nectriaceae	GCA_000222805.1					7858	54.8	17696	8359	6
Forestgreen	Dot	●	050	Trichoderma longibrachiatum	JCM 1883	Dikarya	Ascomycota	Pezizomycotina	Sordariomycetes	Hypocreales	Hypocreaceae	GCA_001950475.1					13	32.3	9700	6696	This study
Forestgreen	Dot	●	051	Trichoderma atroviride	JCM 9410	Dikarya	Ascomycota	Pezizomycotina	Sordariomycetes	Hypocreales	Hypocreaceae	GCA_001599035.1					23	37.3	12533	8078	This study
Forestgreen	Dot	●	046	Gliomastix tumulicola	JCM 17184	Dikarya	Ascomycota	Pezizomycotina	Sordariomycetes	Hypocreales	Bionectriaceae	GCA_001599755.1					72	42.4	13840	7492	This study
Forestgreen	Dot	●	001	Albophoma yamanashiensis	JCM 11844	Dikarya	Ascomycota	Pezizomycotina	Sordariomycetes	Hypocreales	Ophiocordycipitaceae	GCA_001600555.1					66	31.4	10464	7110	This study
Forestgreen	Dot	●	045	Sarocladium oryzae	JCM 12450	Dikarya	Ascomycota	Pezizomycotina	Sordariomycetes	Hypocreales	Sarocladiaceae	GCA_001972265.1					47	32.4	10996	7156	This study
Forestgreen	Dot	●	047	Stachybotrys echinatus	JCM 22618	Dikarya	Ascomycota	Pezizomycotina	Sordariomycetes	Hypocreales	Stachybotryaceae	GCA_001599555.1					106	43.7	14185	8081	This study
Forestgreen	Dot	●	056	Pyricularia grisea	70-15	Dikarya	Ascomycota	Pezizomycotina	Sordariomycetes	Magnaporthales	Pyriculariaceae	GCA_000002495.2					53	41	12836	8738	7
Forestgreen	Dot	●	060	Leptographium clavigerum	kw1407	Dikarya	Ascomycota	Pezizomycotina	Sordariomycetes	Ophiostomatales	Ophiostomataceae		Grocl1	v1.0			289	29.8	8312	5671	8
Forestgreen	Dot	●	062	Ophiostoma piceae	UAMH 11346	Dikarya	Ascomycota	Pezizomycotina	Sordariomycetes	Ophiostomatales	Ophiostomataceae		Ophpc1	v1.0			45	32.8	8884	6035	9
Forestgreen	Dot	●	061	Dryadomyces quercivorus	JCM 11526	Dikarya	Ascomycota	Pezizomycotina	Sordariomycetes	Ophiostomatales	Ophiostomataceae	GCA_001662465.1					26	25.9	8906	6050	This study
Forestgreen	Dot	●	063	Chaetomium globosum	CBS 148.51	Dikarya	Ascomycota	Pezizomycotina	Sordariomycetes	Sordariales	Chaetomiaceae				chaetomium_globosum_1_proteins.fasta	https://www.broadinstitute.org/fungal-genome-initiative/chaetomium-globosum-genome-project	37	34.9	11124	7134	10
Forestgreen	Dot	●	064	Neurospora crassa	OR74A	Dikarya	Ascomycota	Pezizomycotina	Sordariomycetes	Sordariales	Sordariaceae	GCA_000182925.1					251	39.2	9839	7344	11
Forestgreen	Dot	●	044	Apiospora pseudosinensis	JCM 6018	Dikarya	Ascomycota	Pezizomycotina	Sordariomycetes	Xylariales	Apiosporaceae	BCHC00000000					89	51.1	15605	8590	This study
Forestgreen	Dot	●	002	Endocalyx cinctus	JCM 7946	Dikarya	Ascomycota	Pezizomycotina	Sordariomycetes	Xylariales	Cainiaceae	GCA_001600455.1					17	44.8	14411	8700	This study
Forestgreen	Dot	●	070	Daldinia eschscholtzii	EC12	Dikarya	Ascomycota	Pezizomycotina	Sordariomycetes	Xylariales	Hypoxylaceae		DalEC12_1	v1.0			398	37.6	11173	7161	12
Forestgreen	Dot	●	069	Pestalotiopsis fici	W106-1	Dikarya	Ascomycota	Pezizomycotina	Sordariomycetes	Amphisphaeriales	Pestalotiopsidaceae	GCA_000516985.1					39	51.9	15413	7536	13
Forestgreen	Dot	●	003	Didymobotryum rigidum	JCM 8837	Dikarya	Ascomycota	Pezizomycotina	Sordariomycetes	Xylariales	Vamsapriyaceae	GCA_001600575.1					31	41.7	13922	8554	This study
Forestgreen	Dot	●	065	Xylaria hypoxylon	DSM 108379	Dikarya	Ascomycota	Pezizomycotina	Sordariomycetes	Xylariales	Xylariaceae	GCA_004768795.1					635	42.8	11038	6585	14
Forestgreen	Dot	●	048	Furcasterigmium furcatum	JCM 9210	Dikarya	Ascomycota	Pezizomycotina	Sordariomycetes	Glomerellales	Plectosphaerellaceae	GCA_001599815.1					9	40.3	14492	7362	This study
Forestgreen	Dot	●	049	Sodiomyces alcalophilus	JCM 7366	Dikarya	Ascomycota	Pezizomycotina	Sordariomycetes	Glomerellales	Plectosphaerellaceae		Acral2	v2.0			13	54.4	9521	7334
Forestgreen	Dot	●	057	Chalaropsis thielavioides	JCM 1933	Dikarya	Ascomycota	Pezizomycotina	Sordariomycetes	Microascales	Ceratocystidaceae	GCA_001599435.1					12	23.3	6703	5290	This study
Forestgreen	Dot	●	058	Thielaviopsis euricoi	JCM 6020	Dikarya	Ascomycota	Pezizomycotina	Sordariomycetes	Microascales	Ceratocystidaceae	GCA_001599615.1					30	29.6	7303	5566	This study
Forestgreen	Dot	●	059	Thielaviopsis ethacetica	JCM 6961	Dikarya	Ascomycota	Pezizomycotina	Sordariomycetes	Microascales	Ceratocystidaceae	GCA_001599055.1					76	29.5	7340	5595	This study
Forestgreen	Dot	●	066	Pestalotiopsis sp.	JCM 9685	Dikarya	Ascomycota	Pezizomycotina	Sordariomycetes	Amphisphaeriales	Sporocadaceae	GCA_001599175.1					13	48.2	14987	8028	This study
Forestgreen	Dot	●	033	Unidentified fungus	JCM 23157	Dikarya	Ascomycota	Pezizomycotina	Sordariomycetes			GCA_001599675.1					17	33.5	9832	6757	This study
Olivedrab	Filled diamond	◆	035	Kendrickiella phycomyces1	JCM 18027	Dikarya	Ascomycota	Pezizomycotina	Ascomycota incertae sedis			BCGW00000000					33	21	7954	5906	This study
Olivedrab	Filled diamond	◆	036	Chaetomella raphigera	JCM 9995	Dikarya	Ascomycota	Pezizomycotina	Leotiomycetes	Chaetomellales	Chaetomellaceae	BCGV00000000					12	30.5	10008	6984	This study
Olivedrab	Filled diamond	◆	037	Blumeria graminis	DH14	Dikarya	Ascomycota	Pezizomycotina	Leotiomycetes	Helotiales	Erysiphaceae	GCA_000151065.3					6843	118.7	6495	4614	15
Olivedrab	Filled diamond	◆	041	Erysiphe necator	c	Dikarya	Ascomycota	Pezizomycotina	Leotiomycetes	Helotiales	Erysiphaceae	GCA_000798715.1					5935	52.5	6484	4221	16
Olivedrab	Filled diamond	◆	038	Stipitochalara longipes	BDJ	Dikarya	Ascomycota	Pezizomycotina	Leotiomycetes	Helotiales	Hamatocanthoscyphaceae		Chalo1	v1.0			54	52.4	19765	9519	17
Olivedrab	Filled diamond	◆	039	Botrytis cinerea	B05.10	Dikarya	Ascomycota	Pezizomycotina	Leotiomycetes	Helotiales	Sclerotiniaceae	GCA_000143535.2					82	41.2	10351	6759	18
Olivedrab	Filled diamond	◆	040	Sclerotinia sclerotiorum	1980	Dikarya	Ascomycota	Pezizomycotina	Leotiomycetes	Helotiales	Sclerotiniaceae	GCA_000146945.1					36	38.3	14446	10428	19
Limegreen	Filled square	■	007	Diplodia seriata	F98.1	Dikarya	Ascomycota	Pezizomycotina	Dothideomycetes	Botryosphaeriales	Botryosphaeriaceae	GCA_001975905.1					115	37.3	8050	4786	20
Limegreen	Filled square	■	006	Macrophomina phaseolina	MS6	Dikarya	Ascomycota	Pezizomycotina	Dothideomycetes	Botryosphaeriales	Botryosphaeriaceae	GCA_000302655.1					1506	48.9	13806	8060	21
Limegreen	Filled square	■	004	Aureobasidium pullulans	EXF-150	Dikarya	Ascomycota	Pezizomycotina	Dothideomycetes	Dothideales	Saccotheciaceae		Aurpu_var_pul1	v1.0			186	29.6	11866	7629	22
Limegreen	Filled square	■	005	Aureobasidium melanogenum	CBS 110374	Dikarya	Ascomycota	Pezizomycotina	Dothideomycetes	Dothideales	Saccotheciaceae		Aurpu_var_mel1	v1.0			150	26.2	10594	6854	22
Limegreen	Filled square	■	008	Phoma herbarum	JCM 15942	Dikarya	Ascomycota	Pezizomycotina	Dothideomycetes	Pleosporales	Didymellaceae	GCA_001599375.1					218	39.3	13349	7934	This study
Limegreen	Filled square	■	009	Alternaria consortialis	JCM 1940	Dikarya	Ascomycota	Pezizomycotina	Dothideomycetes	Pleosporales	Pleosporaceae	GCA_001950455.1					23	34.2	13146	8290	This study
Limegreen	Filled square	■	010	Beverwykella pulmonaria	JCM 9230	Dikarya	Ascomycota	Pezizomycotina	Dothideomycetes	Pleosporales	Melanommataceae	GCA_001599595.1					50	46	14834	8655	This study
Limegreen	Filled square	■	011	Plenodomus tracheiphilus	IPT5	Dikarya	Ascomycota	Pezizomycotina	Dothideomycetes	Pleosporales	Leptosphaeriaceae		Photr1	v1.0			273	34.2	13209	8561	23
Limegreen	Filled square	■	012	Alternaria alternata	Altal1	Dikarya	Ascomycota	Pezizomycotina	Dothideomycetes	Pleosporales	Pleosporaceae		Altal1	v1.0			79	33	13469	8339	24
Limegreen	Filled square	■	013	Cenococcum geophilum	1.58	Dikarya	Ascomycota	Pezizomycotina	Dothideomycetes	Pleosporomycetidae incertae sedis	Gloniaceae	GCA_001692895.1					268	177.6	14748	8179	25
Cadetblue	Cross	❌	034	Lasallia pustulata	v1	Dikarya	Ascomycota	Pezizomycotina	Lecanoromycetes	Umbilicariales	Umbilicariaceae	GCA_900169345.1					3891	39.2	8268	4755	26
Chartreuse	Plus	➕	014	Exophiala spinifera	CBS 89968	Dikarya	Ascomycota	Pezizomycotina	Eurotiomycetes	Chaetothyriales	Herpotrichiellaceae	GCA_000836115.1					28	32.9	12049	6676
Chartreuse	Plus	➕	015	Fonsecaea pedrosoi	CBS 271.37	Dikarya	Ascomycota	Pezizomycotina	Eurotiomycetes	Chaetothyriales	Herpotrichiellaceae	GCA_000835455.1					11	34.7	12527	6824
Chartreuse	Plus	➕	016	Exophiala spinifera	JCM 15939	Dikarya	Ascomycota	Pezizomycotina	Eurotiomycetes	Chaetothyriales	Herpotrichiellaceae	GCA_001599535.1					38	32.7	12947	7346	This study
Chartreuse	Plus	➕	017	Exophiala alcalophila	JCM 1751	Dikarya	Ascomycota	Pezizomycotina	Eurotiomycetes	Chaetothyriales	Herpotrichiellaceae	GCA_001599775.1					12	29.9	11617	7069	This study
Chartreuse	Plus	➕	018	Exophiala calicioides	JCM 6030	Dikarya	Ascomycota	Pezizomycotina	Eurotiomycetes	Chaetothyriales	Herpotrichiellaceae	GCA_001599795.1					37	36.4	14071	7416	This study
Chartreuse	Plus	➕	020	Aspergillus fumigatus	Af293	Dikarya	Ascomycota	Pezizomycotina	Eurotiomycetes	Eurotiales	Aspergillaceae	GCA_000002655.1					8	29.4	9630	6126	27
Chartreuse	Plus	➕	021	Aspergillus nidulans	FGSC A4	Dikarya	Ascomycota	Pezizomycotina	Eurotiomycetes	Eurotiales	Aspergillaceae	GCA_000149205.2					90	30.2	9541	5705	28
Chartreuse	Plus	➕	022	Aspergillus oryzae	RIB 40	Dikarya	Ascomycota	Pezizomycotina	Eurotiomycetes	Eurotiales	Aspergillaceae	GCA_000184455.1					11	37.9	12074	6192	29
Chartreuse	Plus	➕	023	Aspergillus ruber	CBS 135680	Dikarya	Ascomycota	Pezizomycotina	Eurotiomycetes	Eurotiales	Aspergillaceae		Eurhe1	v1.0			110	26.2	10076	6345	30
Chartreuse	Plus	➕	025	Aspergillus awamori var. piceus	JCM 22320	Dikarya	Ascomycota	Pezizomycotina	Eurotiomycetes	Eurotiales	Aspergillaceae	GCA_001599415.1					35	36.1	12434	7189	This study
Chartreuse	Plus	➕	028	Aspergillus chevalieri	JCM 23047	Dikarya	Ascomycota	Pezizomycotina	Eurotiomycetes	Eurotiales	Aspergillaceae	GCA_001599875.1					75	28	10771	6666	This study
Chartreuse	Plus	➕	029	Penicillium chrysogenum	Wisconsin 54-1255	Dikarya	Ascomycota	Pezizomycotina	Eurotiomycetes	Eurotiales	Aspergillaceae		PenchWisc1_1	v1.0			49	32.2	13671	7727	31
Chartreuse	Plus	➕	026	Penicillium citrinum	JCM 22607	Dikarya	Ascomycota	Pezizomycotina	Eurotiomycetes	Eurotiales	Aspergillaceae	GCA_001950535.1					50	34	12631	7109	This study
Chartreuse	Plus	➕	027	Penicillium roqueforti	JCM 22842	Dikarya	Ascomycota	Pezizomycotina	Eurotiomycetes	Eurotiales	Aspergillaceae	GCA_001599855.1					16	27.1	10598	6642	This study
Chartreuse	Plus	➕	030	Thermoascus aurantiacus	ATCC 26904	Dikarya	Ascomycota	Pezizomycotina	Eurotiomycetes	Eurotiales	Thermoascaceae		Theau1	v1.0			48	28.5	8798	6300
Chartreuse	Plus	➕	024	Thermoascus crustaceus	JCM 12817	Dikarya	Ascomycota	Pezizomycotina	Eurotiomycetes	Eurotiales	Thermoascaceae	GCA_001599835.1					33	31.6	10554	7337	This study
Chartreuse	Plus	➕	031	Histoplasma capsulatum	NAm1	Dikarya	Ascomycota	Pezizomycotina	Eurotiomycetes	Onygenales	Ajellomycetaceae	GCA_000149585.1					275	33	9313	5994	32
Chartreuse	Plus	➕	032	Coccidioides immitis	RS	Dikarya	Ascomycota	Pezizomycotina	Eurotiomycetes	Onygenales	Onygenaceae		Cocim1	v1.0			6	28.9	9910	7291	32
Chartreuse	Plus	➕	019	Endocarpon pusillum	Z07020	Dikarya	Ascomycota	Pezizomycotina	Eurotiomycetes	Verrucariales	Verrucariaceae	GCA_000464535.1					908	37.1	9238	6066	33
turquoise4	Dot	●	071	Symbiotaphrina kochii	CBS 250.77	Dikarya	Ascomycota	Pezizomycotina	Xylonomycetes	Symbiotaphrinales	Symbiotaphrinaceae		Symko1	v1.0			54	24.8	10482	6727
turquoise4	Dot	●	072	Symbiotaphrina buchneri	JCM 9740	Dikarya	Ascomycota	Pezizomycotina	Xylonomycetes	Symbiotaphrinales	Symbiotaphrinaceae	GCA_001599915.1					169	23.7	9367	6361	This study
Darkgreen	Filled diamond	◆	043	Tuber melanosporum	Mel28	Dikarya	Ascomycota	Pezizomycotina	Pezizomycetes	Pezizales	Tuberaceae	GCA_000151645.1					398	124.9	7496	5813	34
Palegreen	Filled square	■	042	Orbilia oligospora	ATCC 24927	Dikarya	Ascomycota	Pezizomycotina	Orbiliomycetes	Orbiliales	Arthrobotryaceae	GCA_000225545.1					215	40.1	11479	7704	35
Deepskyblue	Cross	❌	089	Ascoidea asiatica	JCM 7603	Dikarya	Ascomycota	Saccharomycotina	Saccharomycetes	Ascoideales	Ascoideaceae	GCA_001600695.1					71	20.3	7694	5439	36
Deepskyblue	Cross	❌	105	Cyberlindnera fabianii	JCM 3601	Dikarya	Ascomycota	Saccharomycotina	Saccharomycetes	Phaffomycetales	Phaffomycetaceae	GCA_001599195.1					12	12.3	5874	4258	36
Deepskyblue	Cross	❌	121	Saccharomycopsis malanga	JCM 7620	Dikarya	Ascomycota	Saccharomycotina	Saccharomycetes	Ascoideales	Saccharomycopsidaceae	GCA_001599215.1					44	16.7	6280	4596	36
Deepskyblue	Cross	❌	088	Ascoidea rubescens	NRRL Y-17699	Dikarya	Ascomycota	Saccharomycotina	Saccharomycetes	Ascoideales	Ascoideaceae		Ascru1	v1.0			63	17.5	6802	4896	37
Deepskyblue	Cross	❌	118	Wickerhamomyces anomalus	NRRL Y-366-8	Dikarya	Ascomycota	Saccharomycotina	Saccharomycetes	Phaffomycetales	Wickerhamomycetaceae		Wican1	v1.0			46	14.1	6423	4417	37
Deepskyblue	Cross	❌	120	Cyberlindnera jadinii	NRRL Y-1542	Dikarya	Ascomycota	Saccharomycotina	Saccharomycetes	Phaffomycetales	Phaffomycetaceae		Cybja1	v1.0			76	13	6038	4298	37
Deepskyblue	Cross	❌	108	Eremothecium gossypii	ATCC 10895	Dikarya	Ascomycota	Saccharomycotina	Saccharomycetes	Saccharomycetales	Saccharomycetaceae	GCA_000091025.4					7	10.7	9550	3891	38
Deepskyblue	Cross	❌	107	Nakaseomyces glabratus	CBS 138	Dikarya	Ascomycota	Saccharomycotina	Saccharomycetes	Saccharomycetales	Saccharomycetaceae	GCA_000002545.2					13	12.3	5213	3806	39
Deepskyblue	Cross	❌	110	Kluyveromyces lactis	NRRL Y-1140	Dikarya	Ascomycota	Saccharomycotina	Saccharomycetes	Saccharomycetales	Saccharomycetaceae	GCA_000002515.1					7	10.7	5076	3933	39
Deepskyblue	Cross	❌	114	Naumovozyma castellii	CBS 4309	Dikarya	Ascomycota	Saccharomycotina	Saccharomycetes	Saccharomycetales	Saccharomycetaceae	GCA_000237345.1					10	11.2	5601	3891	40
Deepskyblue	Cross	❌	117	Saccharomyces cerevisiae	S288C	Dikarya	Ascomycota	Saccharomycotina	Saccharomycetes	Saccharomycetales	Saccharomycetaceae	GCF_000146045.2					17	12.2	5917	4072	41
Blue	Plus	➕	087	Nakazawaea peltata	JCM 9829	Dikarya	Ascomycota	Saccharomycotina	Pichiomycetes	Alaninales	Pachysolenaceae	GCA_001599355.1					11	11.7	5620	4101	36
Blue	Plus	➕	075	Ogataea methanolica	JCM 10240	Dikarya	Ascomycota	Saccharomycotina	Pichiomycetes	Pichiales	Pichiaceae	GCA_001600755.1					32	15.1	6063	4353	36
Blue	Plus	➕	077	Ambrosiozyma kashinagicola	JCM 15019	Dikarya	Ascomycota	Saccharomycotina	Pichiomycetes	Pichiales	Pichiaceae	GCA_001599075.1					23	12.3	5787	4212	36
Blue	Plus	➕	079	[Candida] sorboxylosa	JCM 1536	Dikarya	Ascomycota	Saccharomycotina	Pichiomycetes	Pichiales	Pichiaceae	GCA_001599115.1					37	10.7	4724	3634	36
Blue	Plus	➕	082	Ambrosiozyma monospora	JCM 7599	Dikarya	Ascomycota	Saccharomycotina	Pichiomycetes	Pichiales	Pichiaceae	GCA_001599995.1					118	25	8147	5163	36
Blue	Plus	➕	109	Ogataea polymorpha	NCYC 495 leu1.1	Dikarya	Ascomycota	Saccharomycotina	Pichiomycetes	Pichiales	Pichiaceae		Hanpo2	v2.0			7	9	5177	3785	37
Blue	Plus	➕	106	Brettanomyces bruxellensis	CBS 2499	Dikarya	Ascomycota	Saccharomycotina	Pichiomycetes	Pichiales	Pichiaceae		Dekbr2	v2.0			84	13.4	5636	4214	42
Blue	Plus	➕	115	Komagataella pastoris	GS115	Dikarya	Ascomycota	Saccharomycotina	Pichiomycetes	Pichiales	Pichiaceae		Picpa1	v1.0			4	9.2	5040	3917	43
Blue	Plus	➕	076	[Candida] sp.	JCM 15000	Dikarya	Ascomycota	Saccharomycotina	Pichiomycetes	Pichiales	Pichiaceae	GCA_001950555.1					15	9.2	5298	3896	This study
Blue	Plus	➕	078	Hyphopichia homilentoma	JCM 1507	Dikarya	Ascomycota	Saccharomycotina	Pichiomycetes	Serinales	Debaryomycetaceae	GCA_001599095.1					8	12.2	5661	4201	36
Blue	Plus	➕	083	Meyerozyma carpophila	JCM 9396	Dikarya	Ascomycota	Saccharomycotina	Pichiomycetes	Serinales	Debaryomycetaceae	GCA_001599235.1					10	10.2	5418	4046	36
Blue	Plus	➕	084	[Candida] succiphila	JCM 9445	Dikarya	Ascomycota	Saccharomycotina	Pichiomycetes	Serinales	Debaryomycetaceae	GCA_001599255.1					22	12.1	5455	4110	36
Blue	Plus	➕	086	[Candida] boidinii	JCM 9604	Dikarya	Ascomycota	Saccharomycotina	Pichiomycetes	Serinales	Debaryomycetaceae	GCA_001599335.1					32	19.4	6053	4559	36
Blue	Plus	➕	093	Millerozyma acaciae	JCM 10732	Dikarya	Ascomycota	Saccharomycotina	Pichiomycetes	Serinales	Debaryomycetaceae	GCA_001600675.1					10	11.1	5217	4029	36
Blue	Plus	➕	094	Priceomyces haplophilus	JCM 1635	Dikarya	Ascomycota	Saccharomycotina	Pichiomycetes	Serinales	Debaryomycetaceae	GCA_001599895.1					9	10.5	5253	4073	36
Blue	Plus	➕	095	Scheffersomyces lignosus	JCM 9837	Dikarya	Ascomycota	Saccharomycotina	Pichiomycetes	Serinales	Debaryomycetaceae	GCA_001599395.1					19	16.6	6330	4557	36
Blue	Plus	➕	119	Wickerhamia fluorescens	JCM 1821	Dikarya	Ascomycota	Saccharomycotina	Pichiomycetes	Serinales	Debaryomycetaceae	GCA_001599155.1					20	13.2	5676	4408	36
Blue	Plus	➕	103	Hyphopichia burtonii	NRRL Y-1933	Dikarya	Ascomycota	Saccharomycotina	Pichiomycetes	Serinales	Debaryomycetaceae		Hypbu1	v1.0			27	12.4	6005	4417	37
Blue	Plus	➕	091	Debaryomyces hansenii	CBS 767	Dikarya	Ascomycota	Saccharomycotina	Pichiomycetes	Serinales	Debaryomycetaceae	GCA_000006445.2					7	12.2	6272	4543	39
Blue	Plus	➕	092	Candida albicans	SC5314	Dikarya	Ascomycota	Saccharomycotina	Pichiomycetes	Serinales	Debaryomycetaceae				C_albicans_SC5314_A22_current_orf_trans_all.fasta	http://www.candidagenome.org/download/sequence/C_albicans_SC5314/Assembly22/current/	17	28.6	12421	4933	44
Blue	Plus	➕	111	Lodderomyces elongisporus	NRLL YB-4239	Dikarya	Ascomycota	Saccharomycotina	Pichiomycetes	Serinales	Debaryomycetaceae				L_elongisporus_NRLL_YB-4239_orf_trans_all.fasta	http://www.candidagenome.org/download/sequence/L_elongisporus_NRLL_YB-4239/current/	27	15.5	5802	4189	45
Blue	Plus	➕	112	Meyerozyma guilliermondii	ATCC 6260	Dikarya	Ascomycota	Saccharomycotina	Pichiomycetes	Serinales	Debaryomycetaceae	GCA_000149425.1					9	10.6	5920	4117	46
Blue	Plus	➕	116	Scheffersomyces stipitis	NRRL Y-11545	Dikarya	Ascomycota	Saccharomycotina	Pichiomycetes	Serinales	Debaryomycetaceae		Picst3	v2.0			9	15.4	5839	4151	47
Blue	Plus	➕	080	Sungouiella intermedia	JCM 1607	Dikarya	Ascomycota	Saccharomycotina	Pichiomycetes	Serinales	Metschnikowiaceae	GCA_001599135.1					12	13	5823	4271	36
Blue	Plus	➕	104	Metschnikowia bicuspidata	NRRL YB-4993	Dikarya	Ascomycota	Saccharomycotina	Pichiomycetes	Serinales	Metschnikowiaceae		Metbi1	v1.0			48	16.1	5851	4485	37
Slateblue	Cross	●	101	Sporopachydermia quercuum	JCM 9486	Dikarya	Ascomycota	Saccharomycotina	Sporopachydermiomycetes	Sporopachydermiales	Sporopachydermiaceae	GCA_001599295.1					15	16.4	5992	4592	36
Navy	Filled diamond	◆	090	Alloascoidea hylecoeti	JCM 7604	Dikarya	Ascomycota	Saccharomycotina	Alloascoideomycetes	Alloascoideales	Alloascoideaceae	GCA_001600815.1					136	24.8	10003	5972	36
turquoise1	Filled square	■	102	Yarrowia lipolytica	CLIB122	Dikarya	Ascomycota	Saccharomycotina	Dipodascomycetes	Dipodascales	Dipodascaceae	GCA_000002525.1					6	20.5	6448	4706	39
turquoise1	Filled square	■	098	Yarrowia sp.	JCM 30694	Dikarya	Ascomycota	Saccharomycotina	Dipodascomycetes	Dipodascales	Dipodascaceae	GCA_001600515.1					19	21.8	6942	4912	48
turquoise1	Filled square	■	099	Yarrowia sp.	JCM 30695	Dikarya	Ascomycota	Saccharomycotina	Dipodascomycetes	Dipodascales	Dipodascaceae	GCA_001602355.1					41	21.9	6592	4833	48
turquoise1	Filled square	■	100	Yarrowia sp.	JCM 30696	Dikarya	Ascomycota	Saccharomycotina	Dipodascomycetes	Dipodascales	Dipodascaceae	GCA_001600535.1					39	21.8	6583	4846	48
turquoise1	Filled square	■	096	Yarrowia keelungensis	JCM 14894	Dikarya	Ascomycota	Saccharomycotina	Dipodascomycetes	Dipodascales	Dipodascaceae	GCA_001600195.1					41	21.8	6618	4857	36
turquoise1	Filled square	■	097	Yarrowia deformans	JCM 1694	Dikarya	Ascomycota	Saccharomycotina	Dipodascomycetes	Dipodascales	Dipodascaceae	GCA_001600075.1					44	20.9	6704	4820	36
turquoise1	Filled square	■	113	Nadsonia fulvescens	DSM 6958	Dikarya	Ascomycota	Saccharomycotina	Dipodascomycetes	Dipodascales	Incertae sedis		Nadfu1	v1.0			20	13.7	5657	4158	37
turquoise1	Filled square	■	124	Blastobotrys adeninivorans	LS3	Dikarya	Ascomycota	Saccharomycotina	Dipodascomycetes	Dipodascales	Trichomonascaceae		Arxad1	-			4	11.8	6119	4438	49
turquoise1	Filled square	■	125	Sugiyamaella lignohabitans	CBS 10342	Dikarya	Ascomycota	Saccharomycotina	Dipodascomycetes	Dipodascales	Trichomonascaceae	GCA_001640025.2					4	15.9	5128	3600	50
turquoise1	Filled square	■	081	Wickerhamiella versatilis	JCM 5958	Dikarya	Ascomycota	Saccharomycotina	Dipodascomycetes	Dipodascales	Trichomonascaceae	GCA_001600375.1					19	9.3	5535	4042	36
turquoise1	Filled square	■	085	Starmerella bombicola	JCM 9596	Dikarya	Ascomycota	Saccharomycotina	Dipodascomycetes	Dipodascales	Trichomonascaceae	GCA_001599315.1					16	9.6	4870	3818	36
turquoise1	Filled square	■	122	Wickerhamiella domercqiae	JCM 9478	Dikarya	Ascomycota	Saccharomycotina	Dipodascomycetes	Dipodascales	Trichomonascaceae	GCA_001599275.1					4	8.5	4928	3854	36
Dodgerblue	Cross	❌	123	Tortispora caseinolytica	NRRL Y-17796	Dikarya	Ascomycota	Saccharomycotina	Trigonopsidomycetes	Trigonopsidales	Trigonopsidaceae		Canca1	v1.0			6	9.2	4657	3714	37
Dodgerblue	Cross	❌	126	Botryozyma mucatilis	CBS 9042	Dikarya	Ascomycota	Saccharomycotina	Trigonopsidomycetes	Trigonopsidales	Trigonopsidaceae		Botmuc1	v1.0			154	21.1	5716	4299
Turquoise	Plus	➕	073	Lipomyces starkeyi	NRRL Y-11557	Dikarya	Ascomycota	Saccharomycotina	Lipomycetes	Lipomycetales	Lipomycetaceae	GCA_001661325.1					117	21.3	8192	5345	37
Turquoise	Plus	➕	074	Myxozyma melibiosi	Phaff 52-87	Dikarya	Ascomycota	Saccharomycotina	Lipomycetes	Lipomycetales	Lipomycetaceae		Myxme1	v1.0			24	15.3	6299	4645
Blueviolet	Dot	●	131	Schizosaccharomyces cryophilus	OY26	Dikarya	Ascomycota	Taphrinomycotina	Schizosaccharomycetes	Schizosaccharomycetales	Schizosaccharomycetaceae	GCA_000004155.2					30	11.6	5180	3826	51
Blueviolet	Dot	●	132	Schizosaccharomyces japonicus	yFS275	Dikarya	Ascomycota	Taphrinomycotina	Schizosaccharomycetes	Schizosaccharomycetales	Schizosaccharomycetaceae	GCA_000149845.2					32	11.7	4878	3712	51
Blueviolet	Dot	●	133	Schizosaccharomyces octosporus	yFS286	Dikarya	Ascomycota	Taphrinomycotina	Schizosaccharomycetes	Schizosaccharomycetales	Schizosaccharomycetaceae	GCA_000150505.2					5	11.6	4986	3725	51
Blueviolet	Dot	●	130	Schizosaccharomyces pombe	972h-	Dikarya	Ascomycota	Taphrinomycotina	Schizosaccharomycetes	Schizosaccharomycetales	Schizosaccharomycetaceae	GCA_000002945.2					4	12.6	5133	3864	52
Darkmagenta	Filled diamond	◆	127	Pneumocystis carinii	B80	Dikarya	Ascomycota	Taphrinomycotina	Pneumocystidomycetes	Pneumocystidales	Pneumocystidaceae	GCA_001477545.1					62	7.7	3646	3033	53
Darkmagenta	Filled diamond	◆	128	Pneumocystis jirovecii	RU7	Dikarya	Ascomycota	Taphrinomycotina	Pneumocystidomycetes	Pneumocystidales	Pneumocystidaceae	GCA_001477535.1					70	8.4	3761	3080	53
Darkmagenta	Filled diamond	◆	129	Pneumocystis murina	B123	Dikarya	Ascomycota	Taphrinomycotina	Pneumocystidomycetes	Pneumocystidales	Pneumocystidaceae	GCA_000349005.2					20	7.5	3623	3067	53
Mediumorchid	Filled square	■	134	Protomyces lactucae-debilis	12-1054	Dikarya	Ascomycota	Taphrinomycotina	Taphrinomycetes	Taphrinales	Protomycetaceae		Prola1	v1.0			44	12.9	6725	5149	54
Mediumorchid	Filled square	■	135	Taphrina deformans	PYCC 5710	Dikarya	Ascomycota	Taphrinomycotina	Taphrinomycetes	Taphrinales	Taphrinaceae		Tapde1_1	v1.0			394	13.4	4609	3610	55
purple2	Plus	➕	136	Saitoella complicata	NRRL Y-17804	Dikarya	Ascomycota	Taphrinomycotina	Saitoellomycetes	Saitoellales	Saitoellaceae	GCA_001661265.1					35	14.1	7034	5292	37
purple4	Cross	❌	137	Neolecta irregularis	DAH-3	Dikarya	Ascomycota	Taphrinomycotina	Neolectomycetes	Neolectales	Neolectaceae	GCA_001929475.1					4483	14.2	5579	4269	56
Orangered	Plus	➕	140	Coprinopsis cinerea	okayama7#130	Dikarya	Basidiomycota	Agaricomycotina	Agaricomycetes	Agaricales	Psathyrellaceae	GCA_000182895.1					68	36.2	13356	7729	57
Orangered	Plus	➕	142	Schizophyllum commune	H4-8	Dikarya	Basidiomycota	Agaricomycotina	Agaricomycetes	Agaricales	Schizophyllaceae		Schco3	v3.0			25	38.7	16319	9523	58
Orangered	Plus	➕	141	Schizophyllum commune	JCM 22674	Dikarya	Basidiomycota	Agaricomycotina	Agaricomycetes	Agaricales	Schizophyllaceae	GCA_001599475.1					230	39	13664	8033	This study
Orangered	Plus	➕	139	Laccaria bicolor	S238N-H82	Dikarya	Basidiomycota	Agaricomycotina	Agaricomycetes	Agaricales	Hydnangiaceae		Lacbi2	v2.0			55	60.7	23132	12051	59
Orangered	Plus	➕	143	Auricularia subglabra	TFB-10046 SS5	Dikarya	Basidiomycota	Agaricomycotina	Agaricomycetes	Auriculariales	Auriculariaceae	GCA_000265015.1					1531	74.9	23555	10248	60
Orangered	Plus	➕	152	Coniophora puteana	RWD-64-598 SS2	Dikarya	Basidiomycota	Agaricomycotina	Agaricomycetes	Boletales	Coniophorineae	GCA_000271625.1					210	43	13758	6574	60
Orangered	Plus	➕	146	Punctularia strigosozonata	HHB-11173 SS5	Dikarya	Basidiomycota	Agaricomycotina	Agaricomycetes	Corticiales	Punctulariaceae	GCA_000264995.1					195	34.2	11540	6387	60
Orangered	Plus	➕	147	Gloeophyllum trabeum	ATCC 11539	Dikarya	Basidiomycota	Agaricomycotina	Agaricomycetes	Gloeophyllales	Gloeophyllaceae		Glotr1_1	v1.0			442	37.2	11755	6781	60
Orangered	Plus	➕	149	Trametes versicolor	FP-101664 SS1	Dikarya	Basidiomycota	Agaricomycotina	Agaricomycetes	Polyporales	Polyporaceae		Trave1	v1.0			283	44.8	14296	7125	60
Orangered	Plus	➕	153	Stereum hirsutum	FP-91666 SS1	Dikarya	Basidiomycota	Agaricomycotina	Agaricomycetes	Russulales	Stereaceae		Stehi1	v1.0			159	46.5	14066	7363	60
Orangered	Plus	➕	145	Rhizoctonia solani	AG-3	Dikarya	Basidiomycota	Agaricomycotina	Agaricomycetes	Cantharellales	Ceratobasidiaceae	GCA_000524645.1					326	51.7	12726	6376	61
Orangered	Plus	➕	148	Neolentinus lepideus	HHB14362 ss-1	Dikarya	Basidiomycota	Agaricomycotina	Agaricomycetes	Gloeophyllales	Gloeophyllaceae		Neole1	v1.0			331	35.6	13157	7629	62
Orangered	Plus	➕	138	Fomitopsis quercina	L15889 ss-12	Dikarya	Basidiomycota	Agaricomycotina	Agaricomycetes	Polyporales	Fomitopsidaceae		Daequ1	v1.0			357	32.7	12199	7515	62
Orangered	Plus	➕	150	Phanerodontia chrysosporium	RP-78	Dikarya	Basidiomycota	Agaricomycotina	Agaricomycetes	Polyporales	Phanerochaetaceae		Phchr2	v2.0			232	35.2	11777	8185	63
Orangered	Plus	➕	151	Heterobasidion irregulare	TC 32-1	Dikarya	Basidiomycota	Agaricomycotina	Agaricomycetes	Russulales	Bondarzewiaceae	GCA_000320585.2					15	33.6	13275	8037	64
Orangered	Plus	➕	144	Serpula lacrymans	S7.9	Dikarya	Basidiomycota	Agaricomycotina	Agaricomycetes	Boletales	Serpulaceae		Serpula lacrymans S7.9	v1.0			46	42.8	12925	7520
Orange	Dot	●	154	Calocera viscosa	TUFC12733	Dikarya	Basidiomycota	Agaricomycotina	Dacrymycetes	Dacrymycetales	Dacrymycetaceae	GCA_001630345.1					214	29.1	12363	7379	62
Coral	Filled diamond	◆	158	Tausonia pamirica	JCM 10408	Dikarya	Basidiomycota	Agaricomycotina	Tremellomycetes	Cystofilobasidiales	Mrakiaceae	BCJB00000000					127	25.1	8290	5570	This study
Coral	Filled diamond	◆	159	Udeniomyces pyricola	JCM 2958	Dikarya	Basidiomycota	Agaricomycotina	Tremellomycetes	Cystofilobasidiales	Mrakiaceae	BCIK00000000					42	25.1	7086	5233	This study
Coral	Filled diamond	◆	160	Udeniomyces megalosporus	JCM 5269	Dikarya	Basidiomycota	Agaricomycotina	Tremellomycetes	Cystofilobasidiales	Mrakiaceae	BCKM00000000					52	20.8	6748	5004	This study
Coral	Filled diamond	◆	161	Tausonia pullulans	JCM 9886	Dikarya	Basidiomycota	Agaricomycotina	Tremellomycetes	Cystofilobasidiales	Mrakiaceae	BCIQ00000000					107	23.1	7264	5125	This study
Coral	Filled diamond	◆	162	Mrakia aquatica	JCM 1775	Dikarya	Basidiomycota	Agaricomycotina	Tremellomycetes	Cystofilobasidiales	Mrakiaceae	BCHL00000000					71	20.6	6777	5005	This study
Coral	Filled diamond	◆	163	Mrakia frigida	JCM 7857	Dikarya	Basidiomycota	Agaricomycotina	Tremellomycetes	Cystofilobasidiales	Mrakiaceae	GCA_001600395.1					149	28.6	9504	5976	This study
Coral	Filled diamond	◆	164	Phaffia rhodozyma	JCM 9681	Dikarya	Basidiomycota	Agaricomycotina	Tremellomycetes	Cystofilobasidiales	Mrakiaceae	GCA_001600435.1					43	19.1	6242	4673	This study
Coral	Filled diamond	◆	165	Filobasidium elegans	JCM 10632	Dikarya	Basidiomycota	Agaricomycotina	Tremellomycetes	Filobasidiales	Filobasidiaceae	BCJP00000000					248	23.3	7765	5808	This study
Coral	Filled diamond	◆	166	Filobasidium globisporum	JCM 10633	Dikarya	Basidiomycota	Agaricomycotina	Tremellomycetes	Filobasidiales	Filobasidiaceae	BCJQ00000000					250	23.7	7632	5671	This study
Coral	Filled diamond	◆	167	Filobasidium wieringae	JCM 11695	Dikarya	Basidiomycota	Agaricomycotina	Tremellomycetes	Filobasidiales	Filobasidiaceae	GCA_001600055.1					36	19.8	7239	5296	This study
Coral	Filled diamond	◆	169	Naganishia albida	JCM 2334	Dikarya	Basidiomycota	Agaricomycotina	Tremellomycetes	Filobasidiales	Filobasidiaceae	GCA_001599735.1					74	20.7	7443	5538	This study
Coral	Filled diamond	◆	171	Filobasidium uniguttulatum	JCM 3685	Dikarya	Basidiomycota	Agaricomycotina	Tremellomycetes	Filobasidiales	Filobasidiaceae	BCJK00000000					46	17.7	6454	4733	This study
Coral	Filled diamond	◆	168	Solicoccozyma phenolica	JCM 11743	Dikarya	Basidiomycota	Agaricomycotina	Tremellomycetes	Filobasidiales	Piskurozymaceae	GCA_001600015.1					71	22.3	7536	5506	This study
Coral	Filled diamond	◆	170	Solicoccozyma terricola	JCM 24518	Dikarya	Basidiomycota	Agaricomycotina	Tremellomycetes	Filobasidiales	Piskurozymaceae	GCA_001600875.1					79	24.1	8408	5607	This study
Coral	Filled diamond	◆	172	Piskurozyma capsuligena	JCM 9041	Dikarya	Basidiomycota	Agaricomycotina	Tremellomycetes	Filobasidiales	Piskurozymaceae	BCJM00000000					40	22.3	7588	5797	This study
Coral	Filled diamond	◆	173	Holtermanniella nyarrowii	JCM 11471	Dikarya	Basidiomycota	Agaricomycotina	Tremellomycetes	Holtermanniales	Holtermanniaceae	GCA_001600035.1					33	17.7	7521	5430	This study
Coral	Filled diamond	◆	174	Holtermannia corniformis	JCM 1743	Dikarya	Basidiomycota	Agaricomycotina	Tremellomycetes	Holtermanniales	Holtermanniaceae	GCA_001599935.1					129	20.7	8289	5953	This study
Coral	Filled diamond	◆	177	Bullera alba	JCM 2954	Dikarya	Basidiomycota	Agaricomycotina	Tremellomycetes	Tremellales	Bulleraceae	GCA_001600095.1					8	19.4	7954	5822	This study
Coral	Filled diamond	◆	178	Dioszegia aurantiaca	JCM 2956	Dikarya	Basidiomycota	Agaricomycotina	Tremellomycetes	Tremellales	Bulleribasidiaceae	GCA_001600655.1					52	19.3	8106	5771	65
Coral	Filled diamond	◆	179	Dioszegia crocea	JCM 2961	Dikarya	Basidiomycota	Agaricomycotina	Tremellomycetes	Tremellales	Bulleribasidiaceae	GCA_001600615.1					26	20.6	8753	6022	66
Coral	Filled diamond	◆	181	Cryptococcus deneoformans	JEC21	Dikarya	Basidiomycota	Agaricomycotina	Tremellomycetes	Tremellales	Cryptococcaceae	GCA_000091045.1					14	19.1	6594	4572	67
Coral	Filled diamond	◆	175	Phaeotremella fagi	JCM 13614	Dikarya	Basidiomycota	Agaricomycotina	Tremellomycetes	Tremellales	Phaeotremellaceae	GCA_001599715.1					30	22.6	10515	7350	66
Coral	Filled diamond	◆	180	Phaeotremella skinneri	JCM 9039	Dikarya	Basidiomycota	Agaricomycotina	Tremellomycetes	Tremellales	Phaeotremellaceae	GCA_001599695.1					58	20.8	7577	5575	66
Coral	Filled diamond	◆	182	Phaeotremella foliacea	JCM 11330	Dikarya	Basidiomycota	Agaricomycotina	Tremellomycetes	Tremellales	Phaeotremellaceae	BCHW00000000					90	22.2	8307	6072	This study
Coral	Filled diamond	◆	183	Tremella mesenterica	ATCC 24925	Dikarya	Basidiomycota	Agaricomycotina	Tremellomycetes	Tremellales	Tremellaceae		Treme1	v1.0			45	28.6	8313	6189	60
Coral	Filled diamond	◆	184	Tremella mesenterica	DSM 1558	Dikarya	Basidiomycota	Agaricomycotina	Tremellomycetes	Tremellales	Tremellaceae	GCA_000271645.1					45	28.6	8308	6185	60
Coral	Filled diamond	◆	176	Saitozyma sp.	JCM 24511	Dikarya	Basidiomycota	Agaricomycotina	Tremellomycetes	Tremellales	Trimorphomycetaceae	GCA_001600855.1					55	28.2	10192	6318	68
Coral	Filled diamond	◆	189	Takashimella tepidaria	JCM 11965	Dikarya	Basidiomycota	Agaricomycotina	Tremellomycetes	Trichosporonales	Tetragoniomycetaceae	GCA_003116915.1					44	22.4	7341	5364	66
Coral	Filled diamond	◆	190	Takashimella koratensis	JCM 12878	Dikarya	Basidiomycota	Agaricomycotina	Tremellomycetes	Trichosporonales	Tetragoniomycetaceae	GCA_003116875.1					31	25.1	9520	6617	66
Coral	Filled diamond	◆	194	Apiotrichum brassicae	JCM 1599	Dikarya	Basidiomycota	Agaricomycotina	Tremellomycetes	Trichosporonales	Trichosporonaceae	GCA_001600295.1					16	23.6	7942	5715	66
Coral	Filled diamond	◆	200	Apiotrichum domesticum	JCM 9580	Dikarya	Basidiomycota	Agaricomycotina	Tremellomycetes	Trichosporonales	Trichosporonaceae	GCA_001599015.1					28	24.5	8170	5908	69
Coral	Filled diamond	◆	204	Apiotrichum gamsii	JCM 9941	Dikarya	Basidiomycota	Agaricomycotina	Tremellomycetes	Trichosporonales	Trichosporonaceae	GCA_001600315.1					29	24.6	8551	5951	66
Coral	Filled diamond	◆	185	Apiotrichum gracile	JCM 10018	Dikarya	Basidiomycota	Agaricomycotina	Tremellomycetes	Trichosporonales	Trichosporonaceae	GCA_001600335.1					17	24.1	8554	5989	This study
Coral	Filled diamond	◆	198	Apiotrichum laibachii	JCM 2947	Dikarya	Basidiomycota	Agaricomycotina	Tremellomycetes	Trichosporonales	Trichosporonaceae	GCA_001600735.1					26	30.6	10074	6448	66
Coral	Filled diamond	◆	201	Apiotrichum montevideense	JCM 9937	Dikarya	Basidiomycota	Agaricomycotina	Tremellomycetes	Trichosporonales	Trichosporonaceae	GCA_001598995.1					61	24.9	8247	5923	66
Coral	Filled diamond	◆	191	Apiotrichum porosum	JCM 1458	Dikarya	Basidiomycota	Agaricomycotina	Tremellomycetes	Trichosporonales	Trichosporonaceae	GCA_001600255.1					37	26	9200	6010	66
Coral	Filled diamond	◆	187	Apiotrichum veenhuisii	JCM 10691	Dikarya	Basidiomycota	Agaricomycotina	Tremellomycetes	Trichosporonales	Trichosporonaceae	GCA_001600595.1					35	31.6	9184	6313	66
Coral	Filled diamond	◆	157	Cutaneotrichosporon arboriforme	JCM 14201	Dikarya	Basidiomycota	Agaricomycotina	Tremellomycetes	Trichosporonales	Trichosporonaceae	GCA_002335565.1					28	19.9	7718	5662	66
Coral	Filled diamond	◆	193	Cutaneotrichosporon curvatum	JCM 1532	Dikarya	Basidiomycota	Agaricomycotina	Tremellomycetes	Trichosporonales	Trichosporonaceae	GCA_001600275.1					75	18.6	6994	5127	66
Coral	Filled diamond	◆	192	Cutaneotrichosporon cutaneum	JCM 1462	Dikarya	Basidiomycota	Agaricomycotina	Tremellomycetes	Trichosporonales	Trichosporonaceae	GCA_001600715.1					98	23.2	9244	6274	66
Coral	Filled diamond	◆	210	Cutaneotrichosporon cyanovorans	JCM 31833	Dikarya	Basidiomycota	Agaricomycotina	Tremellomycetes	Trichosporonales	Trichosporonaceae	GCA_002335625.1					90	19.9	7409	5502	66
Coral	Filled diamond	◆	206	Cutaneotrichosporon daszewskae	JCM 11166	Dikarya	Basidiomycota	Agaricomycotina	Tremellomycetes	Trichosporonales	Trichosporonaceae	GCA_002335585.1					12	17.2	7985	5615	66
Coral	Filled diamond	◆	188	Cutaneotrichosporon dermatis	JCM 11170	Dikarya	Basidiomycota	Agaricomycotina	Tremellomycetes	Trichosporonales	Trichosporonaceae	GCA_003116895.1					37	23.3	8671	5996	66
Coral	Filled diamond	◆	202	Cutaneotrichosporon mucoides	JCM 9939	Dikarya	Basidiomycota	Agaricomycotina	Tremellomycetes	Trichosporonales	Trichosporonaceae	GCA_003116955.1					84	40.8	14964	6335	66
Coral	Filled diamond	◆	156	Cutaneotrichosporon oleaginosum	IBC0246	Dikarya	Basidiomycota	Agaricomycotina	Tremellomycetes	Trichosporonales	Trichosporonaceae		Triol1	v1.0			180	19.8	8320	6046	70
Coral	Filled diamond	◆	155	Haglerozyma chiarellii	MYA-4694	Dikarya	Basidiomycota	Agaricomycotina	Tremellomycetes	Trichosporonales	Trichosporonaceae		Trich1	v1.0			7	24.8	7766	5583
Coral	Filled diamond	◆	186	Pascua guehoae	JCM 10690	Dikarya	Basidiomycota	Agaricomycotina	Tremellomycetes	Trichosporonales	Trichosporonaceae	GCA_001600415.1					35	33.7	10204	6489	66
Coral	Filled diamond	◆	207	Prillingera fragicola	JCM 1530	Dikarya	Basidiomycota	Agaricomycotina	Tremellomycetes	Trichosporonales	Trichosporonaceae	GCA_002335605.1					21	20.3	8074	5622	66
Coral	Filled diamond	◆	195	Trichosporon asahii	JCM 2466	Dikarya	Basidiomycota	Agaricomycotina	Tremellomycetes	Trichosporonales	Trichosporonaceae	GCA_001972365.1					36	24.7	8763	6199	71
Coral	Filled diamond	◆	196	Trichosporon coremiiforme	JCM 2938	Dikarya	Basidiomycota	Agaricomycotina	Tremellomycetes	Trichosporonales	Trichosporonaceae	GCA_001752605.1					190	42.4	14886	6570	71
Coral	Filled diamond	◆	197	Trichosporon faecale	JCM 2941	Dikarya	Basidiomycota	Agaricomycotina	Tremellomycetes	Trichosporonales	Trichosporonaceae	GCA_001752585.1					29	24.7	8887	6309	71
Coral	Filled diamond	◆	199	Trichosporon inkin	JCM 9195	Dikarya	Basidiomycota	Agaricomycotina	Tremellomycetes	Trichosporonales	Trichosporonaceae	GCA_001752625.1					18	20.3	7277	5426	71
Coral	Filled diamond	◆	203	Trichosporon ovoides	JCM 9940	Dikarya	Basidiomycota	Agaricomycotina	Tremellomycetes	Trichosporonales	Trichosporonaceae	GCA_001752645.1					89	40.3	14474	6314	71
Coral	Filled diamond	◆	205	Vanrija humicola	JCM 1457	Dikarya	Basidiomycota	Agaricomycotina	Tremellomycetes	Trichosporonales	Trichosporonaceae	GCA_001600235.1					10	22.7	9021	5846	66
Yellow	Filled square	■	208	Wallemia ichthyophaga	EXF-994	Dikarya	Basidiomycota	Wallemiomycotina	Wallemiomycetes	Wallemiales	Wallemiaceae	GCA_000400465.1					82	9.7	4863	3813	72
Yellow	Filled square	■	209	Wallemia mellicola	CBS 633.66	Dikarya	Basidiomycota	Wallemiomycotina	Wallemiomycetes	Wallemiales	Wallemiaceae	GCA_000263375.1					56	9.8	5277	4056	73
Hotpink	Cross	❌	217	Leucosporidium creatinivorum	JCM 10699	Dikarya	Basidiomycota	Pucciniomycotina	Microbotryomycetes	Leucosporidiales	Leucosporidiaceae	GCA_001600635.1					122	28	10454	6155	74
Hotpink	Cross	❌	218	Rhodotorula toruloides	JCM 10020	Dikarya	Basidiomycota	Pucciniomycotina	Microbotryomycetes	Sporidiobolales	Sporidiobolaceae	GCA_001600115.1					88	20.5	8047	5756	74
Hotpink	Cross	❌	219	Rhodotorula toruloides	JCM 10021	Dikarya	Basidiomycota	Pucciniomycotina	Microbotryomycetes	Sporidiobolales	Sporidiobolaceae	GCA_001600135.1					78	20.4	8007	5677	74
Hotpink	Cross	❌	220	Rhodotorula toruloides	JCM 10049	Dikarya	Basidiomycota	Pucciniomycotina	Microbotryomycetes	Sporidiobolales	Sporidiobolaceae	GCA_001600155.1					53	20.3	7938	5701	74
Hotpink	Cross	❌	221	Rhodotorula toruloides	JCM 24501	Dikarya	Basidiomycota	Pucciniomycotina	Microbotryomycetes	Sporidiobolales	Sporidiobolaceae	GCA_001600215.1					38	20.3	8001	5717	74
Hotpink	Cross	❌	241	Rhodotorula toruloides	NP11	Dikarya	Basidiomycota	Pucciniomycotina	Microbotryomycetes	Sporidiobolales	Sporidiobolaceae		Rhoto1	-			94	20.2	8140	5760	75
Hotpink	Cross	❌	222	Sporobolomyces carnicolor	JCM 3766	Dikarya	Basidiomycota	Pucciniomycotina	Microbotryomycetes	Sporidiobolales	Sporidiobolaceae	BCHM00000000					60	19.6	7433	5465	This study
Orchid	Plus	➕	225	Melampsora laricis-populina	98AG31	Dikarya	Basidiomycota	Pucciniomycotina	Pucciniomycetes	Pucciniales	Melampsoraceae	GCA_000204055.1					462	101.1	16372	8632	76
Orchid	Plus	➕	226	Puccinia graminis	CRL 75-36-700-3	Dikarya	Basidiomycota	Pucciniomycotina	Pucciniomycetes	Pucciniales	Pucciniaceae	GCA_000149925.1					392	88.6	15979	8913	76
firebrick2	Dot	●	214	Cystobasidium pallidum	JCM 3780	Dikarya	Basidiomycota	Pucciniomycotina	Cystobasidiomycetes	Cystobasidiales	Cystobasidiaceae	GCA_001599955.1					69	21.7	7365	5276	This study
firebrick2	Dot	●	215	Erythrobasidium yunnanense	JCM 10687	Dikarya	Basidiomycota	Pucciniomycotina	Cystobasidiomycetes	Erythrobasidiales	Erythrobasidiaceae	GCA_001600175.1					11	20.9	9088	6201	This study
firebrick2	Dot	●	216	Erythrobasidium hasegawianum	JCM 1545	Dikarya	Basidiomycota	Pucciniomycotina	Cystobasidiomycetes	Erythrobasidiales	Erythrobasidiaceae	GCA_001972285.1					154	39.2	16123	6713	This study
firebrick2	Dot	●	223	Erythrobasidium elongatum	JCM 5354	Dikarya	Basidiomycota	Pucciniomycotina	Cystobasidiomycetes	Erythrobasidiales	Erythrobasidiaceae	BSKC00000000					62	19	7636	5692	This study
Deeppink	Filled diamond	◆	211	Cystobasidiopsis lactophila	JCM 7595	Dikarya	Basidiomycota	Pucciniomycotina	Agaricostilbomycetes	Agaricostilbales	Chionosphaeraceae	GCA_001599975.1					19	22.2	9424	6123	This study
Deeppink	Filled diamond	◆	212	Kondoa malvinella	JCM 3789	Dikarya	Basidiomycota	Pucciniomycotina	Agaricostilbomycetes	Agaricostilbales	Kondoaceae	BCIM00000000					45	19.2	8277	5707	This study
Deeppink	Filled diamond	◆	213	Kondoa subrosea	JCM 5735	Dikarya	Basidiomycota	Pucciniomycotina	Agaricostilbomycetes	Agaricostilbales	Kondoaceae	BCIN00000000					27	18.9	8150	5668	This study
magenta	Filled square	■	224	Mixia osmundae	IAM 14324	Dikarya	Basidiomycota	Pucciniomycotina	Mixiomycetes	Mixiales	Mixiaceae	GCA_000708205.1					156	13.6	6858	5260	77
Saddlebrown	Cross	❌	242	Moesziomyces antarcticus	JCM 10317	Dikarya	Basidiomycota	Ustilaginomycotina	Ustilaginomycetes	Ustilaginales	Ustilaginaceae	GCA_000747765.1					197	18.1	6766	5194	78
Saddlebrown	Cross	❌	240	Ustilago hordei	Uh4857-4	Dikarya	Basidiomycota	Ustilaginomycotina	Ustilaginomycetes	Ustilaginales	Ustilaginaceae	GCA_000286035.1					713	21.2	7111	5101	79
Saddlebrown	Cross	❌	239	Mycosarcoma maydis	521	Dikarya	Basidiomycota	Ustilaginomycotina	Ustilaginomycetes	Ustilaginales	Ustilaginaceae				ustilago_maydis_1_proteins.fasta	http://www.broad.mit.edu/annotation/genome/ustilago_maydis/Downloads.html	274	19.7	6522	4915	80
Saddlebrown	Cross	❌	238	Farysia acheniorum	JCM 8976	Dikarya	Basidiomycota	Ustilaginomycotina	Ustilaginomycetes	Ustilaginales	Anthracoideaceae	BCHR00000000					23	13	6159	4780	This study
Chocolate	Plus	➕	227	Meira nashicola	JCM 18503	Dikarya	Basidiomycota	Ustilaginomycotina	Exobasidiomycetes	Exobasidiales	Brachybasidiaceae	GCA_001600355.1					58	18	7787	5542	This study
Chocolate	Plus	➕	229	Tilletiaria anomala	UBC 951	Dikarya	Basidiomycota	Ustilaginomycotina	Exobasidiomycetes	Georgefischeriales	Tilletiariaceae	GCA_000711695.1					289	18.7	6808	5346	81
Chocolate	Plus	➕	228	Golubevia pallescens	JCM 5230	Dikarya	Basidiomycota	Ustilaginomycotina	Exobasidiomycetes	Golubeviales	Golubeviaceae	GCA_001599655.1					63	27.8	9297	5560	This study
Chocolate	Plus	➕	236	Pseudomicrostroma phylloplanum	JCM 9035	Dikarya	Basidiomycota	Ustilaginomycotina	Exobasidiomycetes	Microstromatales	Exobasidiomycetidae	BCHS00000000					21	17.1	6298	4753	This study
Chocolate	Plus	➕	234	Microstroma bacarum	JCM 3928	Dikarya	Basidiomycota	Ustilaginomycotina	Exobasidiomycetes	Microstromatales	Microstromataceae	BCHN00000000					35	16.2	6527	4924	This study
Chocolate	Plus	➕	235	Sympodiomycopsis paphiopedili	JCM 8318	Dikarya	Basidiomycota	Ustilaginomycotina	Exobasidiomycetes	Microstromatales	Microstromataceae	BCHQ00000000					14	18.2	6883	5195	This study
Chocolate	Plus	➕	237	Tilletia caries	DAOMC 238032	Dikarya	Basidiomycota	Ustilaginomycotina	Exobasidiomycetes	Tilletiales	Tilletiaceae	GCA_001645005.1					2888	29.5	10204	6137	82
Darkgoldenrod	Dot	●	230	Malassezia dermatis	JCM 11348	Dikarya	Basidiomycota	Ustilaginomycotina	Malasseziomycetes	Malasseziales	Malasseziaceae	GCA_001600775.1					18	7.6	4186	3455	This study
Darkgoldenrod	Dot	●	231	Malassezia japonica	JCM 11963	Dikarya	Basidiomycota	Ustilaginomycotina	Malasseziomycetes	Malasseziales	Malasseziaceae	GCA_001600795.1					16	8.4	4563	3742	This study
Darkgoldenrod	Dot	●	232	Malassezia nana	JCM 12085	Dikarya	Basidiomycota	Ustilaginomycotina	Malasseziomycetes	Malasseziales	Malasseziaceae	GCA_001600835.1					13	7.6	4222	3459	This study
Darkgoldenrod	Dot	●	233	Malassezia globosa	CBS 7966	Dikarya	Basidiomycota	Ustilaginomycotina	Malasseziomycetes	Malasseziales	Malasseziaceae		Malgl1	-			67	9	4286	3325	83
Dimgray	Filled diamond	◆	250	Diversispora epigaea	IT104	Mucoromyceta	Glomeromycota	Glomeromycotina	Glomeromycetes	Diversisporales	Diversisporaceae	GCA_003547095.1					731	156.6	28348	12641	84
Dimgray	Filled diamond	◆	257	Rhizopus arrhizus	99–880	Mucoromyceta	Mucoromycota	Mucoromycotina	Mucoromycetes	Mucorales	Rhizopodaceae		Rhior3	v1.0			81	46.1	17467	7103	85
Dimgray	Filled diamond	◆	252	Mucor circinelloides	CBS 277.49	Mucoromyceta	Mucoromycota	Mucoromycotina	Mucoromycetes	Mucorales	Mucorineae		Mucci2	v1.0			21	36.6	11709	6166	86
Dimgray	Filled diamond	◆	258	Mucor circinelloides	JCM 22480	Mucoromyceta	Mucoromycota	Mucoromycotina	Mucoromycetes	Mucorales	Mucoraceae	GCA_001599575.1					401	36.6	14158	7423	This study
Dimgray	Filled diamond	◆	259	Actinomucor elegans	JCM 22485	Mucoromyceta	Mucoromycota	Mucoromycotina	Mucoromycetes	Mucorales	Mucoraceae	GCA_001599635.1					192	34.2	12653	7280	This study
Dimgray	Filled diamond	◆	251	Podila verticillata	NRRL 6337	Mucoromyceta	Mortierellomycota	Mortierellomycotina	Mortierellomycetes	Mortierellales	Mortierellaceae	GCA_000739165.1					55	41.9	12595	6827
darkslategray	Filled square	■	253	Basidiobolus meristosporus	CBS 931.73	Basidiobolomyceta	Basidiobolomycota	Basidiobolomycotina	Basidiobolomycetes	Basidiobolales	Basidiobolaceae	GCA_002104905.1					1366	89.5	16110	6723	54
Slategray	Cross	❌	255	Linderina pennispora	ATCC 12442	Zoopagomyceta	Kickxellomycota	Kickxellomycotina	Kickxellomycete	Kickxellales	Kickxellaceae		Linpe1	v1.0			227	26.2	9350	6083	54
Slategray	Cross	❌	254	Conidiobolus coronatus	NRRL 28638	Zoopagomyceta	Entomophthoromycota	Entomophthoromycotina	Entomophthoromycetes	Entomophthorales	Conidiobolaceae	GCA_001566745.1					1050	39.9	10572	5567	87
Slategray	Cross	❌	256	Thamnocephalis sphaerospora	RSA 1356	Zoopagomyceta	Zoopagomycota	Zoopagomycotina	Zoopagomycetes	Zoopagales	Sigmoideomycetaceae		Thasp1	v1.0			1385	18.2	6857	4397	88
Steelblue	Plus	➕	245	Gonapodya prolifera	JEL478	Chytridiomyceta	Monoblepharomycota	Monoblepharomycotina	Monoblepharidomycetes	Monoblepharidale	Gonapodyaceae		Ganpr1	v1.0			352	48.8	13831	8294	87
Steelblue	Plus	➕	244	Spizellomyces punctatus	DAOM BR117	Chytridiomyceta	Chytridiomycota	Chytridiomycotina	Chytridiomycetes	Spizellomycetales	Spizellomycetaceae	GCA_000182565.2					38	24.1	9422	6336	89
Steelblue	Plus	➕	246	Piromyces finnis	finn	Chytridiomyceta	Neocallimastigomycota	Neocallimastigomycotina	Neocallimastigomycetes	Neocallimastigales	Piromycetaceae		finn v3.0	v3.0			232	56.5	10978	6189	90
Black	Dot	●	243	Allomyces macrogynus	ATCC 38327	Blastocladiomyceta	Blastocladiomycota	Blastocladiomycotina	Blastocladiomycetes	Blastocladiales	Blastocladiaceae	GCA_000151295.1					101	57.1	19447	8307
Gray	Filled diamond	◆	247	Rozella allomycis	CSF55	Rozellomyceta	Rozellomycota	Rozellomycotina	Incertae sedis	Incertae sedis	Incertae sedis	GCA_000442015.1					1059	11.9	6350	4704	91
gray85	Filled square	■	248	Encephalitozoon cuniculi	GB-M1		Microsporidia	Apansporoblastina	Incertae sedis	Incertae sedis	Incertae sedis	GCA_000091225.1					11	2.5	1996	1641	92
gray85	Filled square	■	249	Edhazardia aedis	USNM 41457		Microsporidia	Incertae sedis	Incertae sedis	Incertae sedis	Incertae sedis	GCA_000230595.3					1429	51.3	4190	3562	93
Classification data is from Mycobank (https://www.mycobank.org/) and Index Fungorum (https://indexfungorum.org/).
For the Candida species shown in square brackets, classification is from the NCBI taxonomy database.
1, see Materials and Methods.
